# Supplementary material for: Chiral N,N′-dioxide-Sc(NTf2)3 complex-catalyzed asymmetric bromoamination of chalones with N-bromosuccinimide as both bromine and amide source
Source: Royal Society of Chemistry journal article supplement (doi:10.1039/c7cc00470b), 2017-01-01
Supplement: c7cc00470b1.pdf [file c7cc00470b1.pdf]

## Electronic Supplementary Information

### Chiral *N,N'*-Dioxide-Sc(NTf<sub>2</sub>)<sub>3</sub>-Complex-Catalyzed Asymmetric Bromoamination of Chalones with *N*-Bromosuccinimide as Both Bromine and Amide Sources

Zhengmeng Wang,<sup>a</sup> Lili Lin,<sup>\*a</sup> Pengfei Zhou,<sup>a</sup> Xiaohua Liu<sup>a</sup> and Xiaoming Feng<sup>\*ab</sup>

- a. Key Laboratory of Green Chemistry & Technology, Ministry of Education, College of Chemistry, Sichuan University, Chengdu 610064, P. R. China
- b. Collaborative Innovation Center of Chemical Science and Engineering, Tianjin, P. R. China

Fax: (+86)28-85418249

E-mail: [lililin@scu.edu.cn](mailto:lililin@scu.edu.cn); [xmfeng@scu.edu.cn](mailto:xmfeng@scu.edu.cn)

#### Contents:

|                                                                                                                                                        |           |
|--------------------------------------------------------------------------------------------------------------------------------------------------------|-----------|
| <b>1. General method .....</b>                                                                                                                         | <b>2</b>  |
| <b>2. General procedure of the catalytic reactions.....</b>                                                                                            | <b>2</b>  |
| <b>3. Gram scale experiment.....</b>                                                                                                                   | <b>2</b>  |
| <b>4. The asymmetric haloamination of chalone with <i>N</i>-iodosuccinimide and <i>N</i>-chlorosuccinimide as both halogen and amide sources. ....</b> | <b>3</b>  |
| <b>5. Control experiments.....</b>                                                                                                                     | <b>4</b>  |
| <b>6. Product characterization datas.....</b>                                                                                                          | <b>5</b>  |
| <b>7. Copies of <sup>1</sup>H NMR and <sup>13</sup>C NMR spectra for products.....</b>                                                                 | <b>36</b> |
| <b>8. Copies of CD spectra in methanol .....</b>                                                                                                       | <b>67</b> |
| <b>9. References .....</b>                                                                                                                             | <b>70</b> |

## 1. General method

$^1\text{H}$  NMR spectra were recorded on commercial instruments (400 MHz). Chemical shifts were reported in ppm from tetramethylsilane with the solvent resonance as the internal standard ( $\text{CDCl}_3$ ,  $\delta = 7.26$ ). Spectra were reported as follows: chemical shift ( $\delta$  ppm), multiplicity (s = singlet, d = doublet, t = triplet, q = quartet, m = multiplet), coupling constants (Hz), integration and assignment.  $^{13}\text{C}$  NMR spectra were collected on commercial instruments (100 MHz) with complete proton decoupling. Chemical shifts are reported in ppm from the tetramethylsilane with the solvent resonance as internal standard ( $\text{CDCl}_3$ ,  $\delta = 77.0$ ). Reactions were carried out using commercial available reagents in over-dried apparatus.  $\text{CH}_2\text{Cl}_2$  was dried over powdered  $\text{CaH}_2$  and distilled under nitrogen just before use. Enantiomeric excesses (*ee*) were determined by HPLC analysis using the corresponding commercial chiral column as stated in the experimental procedures at 25 °C with UV detector at 254 nm. Diastereoselectivity (*dr*) was determined by  $^1\text{H}$  NMR spectra. HRMS was recorded on a commercial apparatus (ESI Source) and  $^{78,9183}\text{Br}$  and  $^{80,9163}\text{Br}$  were chosen as references to calculate the exact mass. Chiral *N,N'*-dioxide ligand were prepared using literature method<sup>1</sup>. Optical rotations were reported at indicated wavelength as follows:  $[\alpha]_D^{25} = (c \text{ g}/100\text{mL}, \text{ in solvent})$ . NBS and NCS were recrystallized from acetone and petroleum ether.

## 2. General procedure of the catalytic reactions

**L-RaPr<sub>2</sub>** (7.0 mg, 0.01 mmol), **Sc(NTf<sub>2</sub>)<sub>3</sub>** (8.8 mg, 0.01 mmol), 3 Å molecular sieve (40 mg) and chalone analogs (0.10 mmol) were added to an over-dried reaction tube under nitrogen atmosphere. 0.3 mL Anhydrous  $\text{CH}_2\text{Cl}_2$  was added and the solution was stirred at 35 °C for 30 minutes. Subsequently, NBS **2** (0.12 mmol) was added and the reaction mixture continued stirring for 36-48 hours. The products were purified by a flash chromatography on silica gel (petroleum ether/ethyl acetate = 4:1-2:1).

## 3. Gram scale experiment

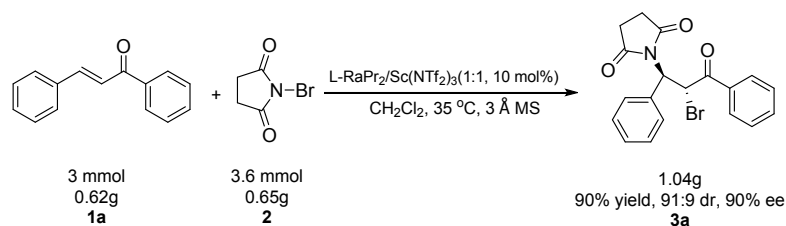

To a dry round-bottom flask, **L-RaPr<sub>2</sub>** (210 mg, 0.30 mmol), Sc(NTf<sub>2</sub>)<sub>3</sub> (264 mg, 0.30 mmol), 3 Å molecular sieve (600 mg) and chalone (624 mg, 3.0 mmol) were added under nitrogen atmosphere. 6.0 mL Anhydrous CH<sub>2</sub>Cl<sub>2</sub> was added and the solution was stirred at 35 °C for 30 minutes. Next, NBS **2** (650 mg, 3.6 mmol) was added and the reaction mixture continued stirring for 40 hours at 35 °C. The residue was purified by a flash chromatography on silica gel (petroleum ether/ethyl acetate = 4:1-2:1) to afford the product **3a** in 1.04 g with 90% yield, 90% ee, and 91:9 dr.

#### 4. The asymmetric haloamination of chalone with *N*-iodosuccinimide and *N*-chlorosuccinimide as both halogen and amide sources

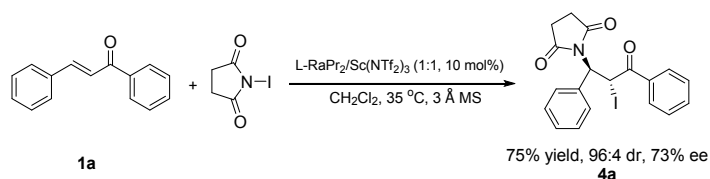

**L-RaPr<sub>2</sub>** (7.0 mg, 0.01 mmol), Sc(NTf<sub>2</sub>)<sub>3</sub> (8.8 mg, 0.01 mmol), 3 Å molecular sieve (40 mg) and chalone **1a** (20.8 mg, 0.10 mmol) were added to an over-dried reaction tube under nitrogen atmosphere. 0.3 mL Anhydrous CH<sub>2</sub>Cl<sub>2</sub> was added and the solution was stirred at 35 °C for 30 minutes. Then, NIS (26.9 mg, 0.12 mmol) was added and the reaction mixture continued stirring for 36 hours at 35 °C. The residue was purified by a flash chromatography on silica gel (petroleum ether/ethyl acetate = 4:1-2:1) to afford the product **4a** in 32.5 mg with 75% yield, 96:4 dr and 73% ee.

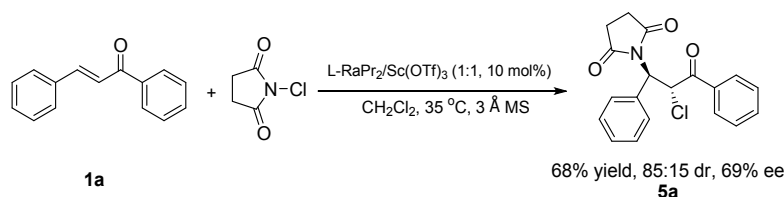

**L-RaPr<sub>2</sub>** (7.0 mg, 0.01 mmol), Sc(OTf)<sub>3</sub> (4.9 mg, 0.01 mmol), 3 Å molecular sieve (40 mg) and chalone **1a** (20.8 mg, 0.10 mmol) were added to an over-dried reaction tube under nitrogen atmosphere. 0.3 mL Anhydrous CH<sub>2</sub>Cl<sub>2</sub> was added and the solution was stirred at 35 °C for 30 minutes. Then, NCS (16.0 mg, 0.12 mmol) was added and the reaction mixture continued stirring for 36 hours at 35 °C. The residue was purified by a flash chromatography on silica gel (petroleum ether/ethyl acetate = 4:1-2:1) to afford the product **5a** in 23.2 mg with 68% yield, 85:15 dr and 69% ee.

## 5. Control experiments

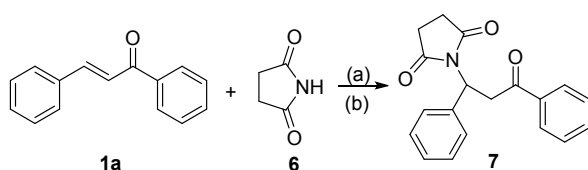

(a) L-RaPr<sub>2</sub>/Sc(NTf<sub>2</sub>)<sub>3</sub> (1:1, 10 mol%), CH<sub>2</sub>Cl<sub>2</sub>, 35 °C, 3 Å MS

(b) The additional base

(1) without base: trace

(2) base: TEA yield: 21%, ee: 75%

(3) base: DIPA yield: 15%, ee: 33%

**L-RaPr<sub>2</sub>** (7.0 mg, 0.01 mmol), Sc(NTf<sub>2</sub>)<sub>3</sub> (8.8 mg, 0.01 mmol), 3 Å molecular sieve (40 mg) and chalone (20.8 mg, 0.10 mmol) were added to an over-dried reaction tube under nitrogen atmosphere. 0.3 mL Anhydrous CH<sub>2</sub>Cl<sub>2</sub> was added and the solution was stirred at 35 °C for 30 minutes. Then, succinimide **6** (11.9 mg, 0.12 mmol) and the corresponding base (0.10 mmol) were added under these conditions. The reaction mixture continued stirring for 24 hours. The residue was purified by a flash chromatography on silica gel (petroleum ether/ethyl acetate = 3:1-2:1) to afford the product **7**.

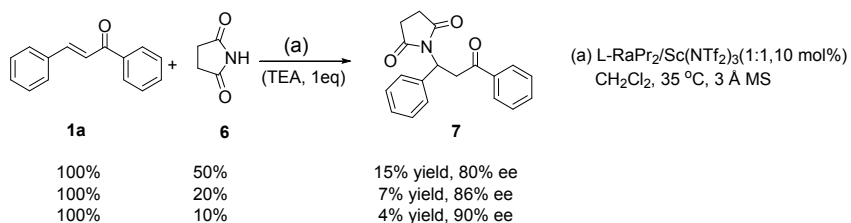

**L-RaPr<sub>2</sub>** (7.0 mg, 0.01 mmol), Sc(NTf<sub>2</sub>)<sub>3</sub> (8.8 mg, 0.01 mmol), 3 Å molecular sieve (40 mg) and chalone (20.8 mg, 0.10 mmol) were added to an over-dried reaction tube under nitrogen atmosphere. 0.3 mL Anhydrous CH<sub>2</sub>Cl<sub>2</sub> was added and the solution was stirred at 35 °C for 30 minutes. Then, succinimide **6** (11.9 mg, 0.12 mmol) and the corresponding base TEA (0.10 mmol) were added under these conditions. The reaction mixture continued stirring for 24 hours. The residue was purified by a flash chromatography on silica gel (petroleum ether/ethyl acetate = 3:1-2:1) to afford the product **7**.

## 6. Product characterization data

### 1-((1*R*,2*R*)-2-Bromo-3-oxo-1,3-diphenylpropyl)pyrrolidine-2,5-dione

3a

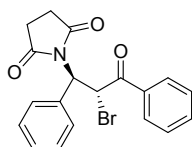

Yield: 33.6 mg (87%), white amorphous solid, 91:9 dr [determined by the ratio of area at  $\delta$  6.02 (d,  $J = 11.6$  Hz, 0.09H) and  $\delta$  5.81 (d,  $J = 11.2$  Hz, 0.91H) in  $^1\text{H}$  NMR]; 91% ee;  $[\alpha]^{24.9}_{\text{D}} = 64.0$  ( $c = 0.73$ ,  $\text{CH}_2\text{Cl}_2$ ); HPLC (Daicel chiralcel IE, *n*-hexane/ *i*-PrOH 90/10, 1.0 mL/min, 254 nm)  $t_{\text{R}(\text{major})} = 19.93$  min,  $t_{\text{R}(\text{minor})} = 24.91$  min;  $^1\text{H}$  NMR (400 MHz,  $\text{CDCl}_3$ )  $\delta = 8.04$  (d,  $J = 7.2$  Hz, 1.82H), 7.94 (d,  $J = 7.6$  Hz, 0.18H), 7.67 – 7.48 (m, 5H), 7.39 (d, 2.74H), 7.24 (d, 0.26H), 6.83 (d,  $J = 11.2$  Hz, 0.09H), 6.63 (d,  $J = 11.2$  Hz, 0.91H), 6.02 (d,  $J = 11.6$  Hz, 0.09H), 5.81 (d,  $J = 11.2$  Hz, 0.91H), 2.73 – 2.49 (m, 4H).  $^{13}\text{C}$  NMR (100 MHz,  $\text{CDCl}_3$ )  $\delta = 192.0$ , 176.6, 136.7, 134.0, 133.8, 129.0, 128.9, 57.4, 44.5, 28.0. ESI-HRMS: calcd for  $[\text{C}_{19}\text{H}_{16}^{78,9183}\text{BrNO}_3 + \text{Na}^+]$  408.0206, found 408.0212; ESI-HRMS: calcd for  $[\text{C}_{19}\text{H}_{16}^{80,9163}\text{BrNO}_3 + \text{Na}^+]$  410.0186, found 410.0196.

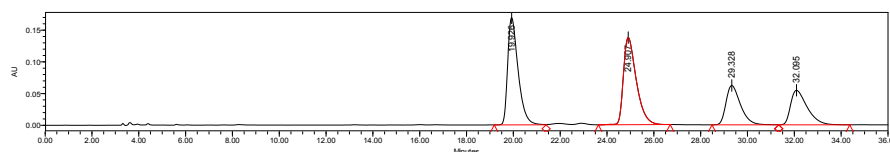

|   | Retention Time | % Area |
|---|----------------|--------|
| 1 | 19.926         | 33.22  |
| 2 | 24.907         | 33.06  |
| 3 | 29.328         | 16.86  |
| 4 | 32.095         | 16.86  |

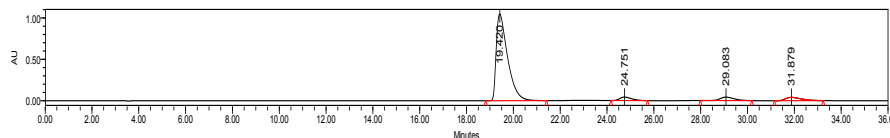

|   | Retention Time | % Area |
|---|----------------|--------|
| 1 | 19.420         | 87.37  |
| 2 | 24.751         | 3.75   |
| 3 | 29.083         | 4.22   |
| 4 | 31.879         | 4.66   |

**1-((1R,2R)-2-Bromo-3-oxo-3-phenyl-1-(o-tolyl)propyl)pyrrolidine-2,5-dione**

**3b**

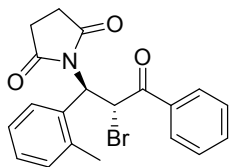

Yield: 32.7 mg (82%), white amorphous solid, 89:11 dr [determined by the ratio of area at  $\delta$  6.25 (d,  $J = 11.2$  Hz, 0.11 H) and  $\delta$  6.11 (d,  $J = 11.2$  Hz, 0.89 H) in  $^1\text{H NMR}$ ], 90% ee;  $[\alpha]^{24.9}_{\text{D}} = 99.0$  ( $c = 0.63$ ,  $\text{CH}_2\text{Cl}_2$ ); HPLC (Daicel chiralcel IE, *n*-hexane/*i*-PrOH 90/10, 1.0 mL/min, 254 nm)  $t_{\text{R}(\text{major})} = 20.45$  min,  $t_{\text{R}(\text{minor})} = 22.70$  min;  $^1\text{H NMR}$  (400 MHz,  $\text{CDCl}_3$ )  $\delta = 8.04$  (d,  $J = 7.6$  Hz, 1.78 H),  $\delta 7.91$  (d,  $J = 7.6$  Hz, 0.22 H), 7.82 – 7.80 (m, 1 H), 7.62 – 7.59 (m, 1H), 7.56 – 7.41 (m, 2 H), 7.26 – 7.02 (m, 3H), 6.88 (d,  $J = 11.2$  Hz, 0.11 H), 6.61 (d,  $J = 11.2$  Hz, 0.89 H), 6.25 (d,  $J = 11.2$  Hz, 0.11 H), 6.11 (d,  $J = 11.2$  Hz, 0.89 H), 2.67 (s, 3H), 2.66 – 2.51 (m, 4H).  $^{13}\text{C NMR}$  (100 MHz,  $\text{CDCl}_3$ )  $\delta = 192.1$ , 177.3, 138.2, 136.4, 134.0, 133.7, 130.8, 128.9, 128.8, 127.5, 126.8, 53.2, 46.7, 28.0, 20.2. ESI-HRMS calcd for  $[\text{C}_{20}\text{H}_{18}^{78,9183}\text{BrNO}_3 + \text{Na}^+]$  422.0363, found 422.0369; ESI-HRMS: calcd for  $[\text{C}_{20}\text{H}_{18}^{80,9163}\text{BrNO}_3 + \text{Na}^+]$  424.0342, found 424.0346.

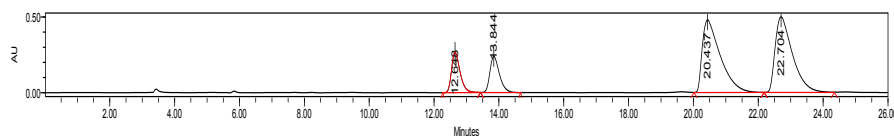

|   | Retention Time | % Area |
|---|----------------|--------|
| 1 | 12.648         | 10.48  |
| 2 | 13.844         | 10.41  |
| 3 | 20.437         | 39.46  |
| 4 | 22.704         | 39.65  |

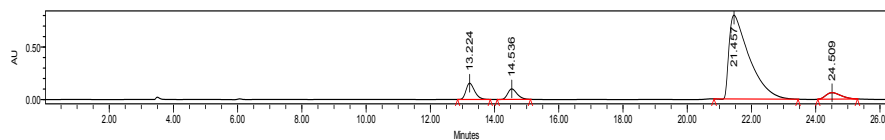

|   | Retention Time | % Area |
|---|----------------|--------|
| 1 | 13.224         | 6.91   |
| 2 | 14.536         | 4.88   |
| 3 | 21.457         | 83.41  |
| 4 | 24.509         | 4.80   |

**1-((1R,2R)-2-Bromo-3-oxo-3-phenyl-1-(m-tolyl)propyl)pyrrolidine-2,5-dione**

**3c**

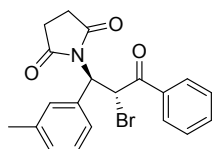

Yield: 35.9 mg (90%), white amorphous solid, 88:12 dr [determined by the ratio of area at  $\delta$  5.98 (d,  $J$  = 11.2 Hz , 0.12H) and  $\delta$  5.76 (d,  $J$  = 10.8 Hz, 0.88H) in  $^1\text{H}$  NMR], 86% ee;  $[\alpha]^{24.9}_{\text{D}}$  = 74.9 ( $c$  = 0.85,  $\text{CH}_2\text{Cl}_2$ ); HPLC (Daicel chiralcel ID,  $n$ -hexane/ $i$ -PrOH 90/10, 1.0 mL/min, 254 nm)  $t_{\text{R(major)}}$  = 17.20 min,  $t_{\text{R(minor)}}$  = 25.20 min;  $^1\text{H}$  NMR (400 MHz,  $\text{CDCl}_3$ )  $\delta$  = 8.06 – 7.94 (m, 2H), 7.63 – 7.58 (m, 1H), 7.53 – 7.27 (m, 5H), 7.19 – 7.03 (m, 1H), 6.81 (d,  $J$  = 11.2 Hz, 0.12H), 6.62 (d,  $J$  = 11.2 Hz , 0.88H), 5.98 (d,  $J$  = 11.2 Hz , 0.12H), 5.76 (d,  $J$  = 10.8 Hz, 0.88H), 2.74 – 2.52 (m, 4H), 2.39 (s, 3H).  $^{13}\text{C}$  NMR (100 MHz,  $\text{CDCl}_3$ )  $\delta$  = 192.0, 176.7, 138.6, 136.6, 134.0, 133.9, 129.8, 129.6, 128.9, 128.7, 126.0, 57.4, 28.0, 21.5. ESI-HRMS calcd for  $[\text{C}_{20}\text{H}_{18}^{78,9183}\text{BrNO}_3+\text{Na}^+]$  422.0363, found 422.0374; ESI-HRMS: calcd for  $[\text{C}_{20}\text{H}_{18}^{80,9163}\text{BrNO}_3+\text{Na}^+]$  424.0342, found 424.0359.

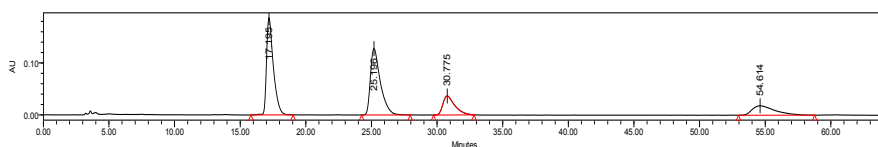

|   | Retention Time | % Area |
|---|----------------|--------|
| 1 | 17.195         | 37.59  |
| 2 | 25.196         | 37.44  |
| 3 | 30.775         | 12.81  |
| 4 | 54.614         | 12.15  |

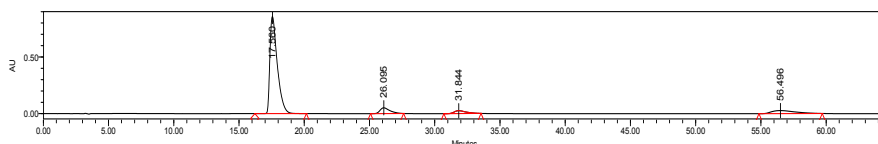

|   | Retention Time | % Area |
|---|----------------|--------|
| 1 | 17.560         | 81.52  |
| 2 | 26.095         | 6.46   |
| 3 | 31.844         | 3.88   |
| 4 | 56.496         | 8.14   |

**1-((1R,2R)-2-Bromo-3-oxo-3-phenyl-1-(p-tolyl)propyl)pyrrolidine-2,5-dione**

**3d**

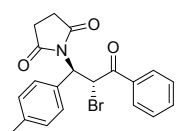

Yield: 35.5 mg (89%), white amorphous solid, 90:10 dr [determined by the ratio of area at  $\delta$  6.00 (d,  $J$  = 11.6 Hz, 0.10H) and  $\delta$  5.79 (d,  $J$  = 11.2 Hz, 0.90H) in

$^1\text{H}$  NMR], 91% ee;  $[\alpha]^{28.0}_{\text{D}} = 83.7$  ( $c = 0.10$ ,  $\text{CH}_2\text{Cl}_2$ ); HPLC (Daicel chiralcel IE, *n*-hexane/*i*-PrOH 90/10, 1.0 mL/min, 254 nm)  $t_{\text{R}(\text{major})} = 21.35$  min,  $t_{\text{R}(\text{minor})} = 27.67$  min;  $^1\text{H}$  NMR (400 MHz,  $\text{CDCl}_3$ )  $\delta = 8.04$  (d,  $J = 7.6$  Hz, 1.80H), 8.04 (d,  $J = 7.6$  Hz, 0.20H), 7.63 – 7.43 (m, 5H), 7.21 (d,  $J = 7.6$  Hz, 1.80H), 7.21 (d,  $J = 7.6$  Hz, 0.20H), 6.80 (d,  $J = 11.6$  Hz, 0.10H), 6.62 (d,  $J = 10.8$  Hz, 0.90H), 6.00 (d,  $J = 11.6$  Hz, 0.10H), 5.79 (d,  $J = 11.2$  Hz, 0.90H), 2.74 – 2.54 (m, 4H), 2.37 (s, 3H).  $^{13}\text{C}$  NMR (100 MHz,  $\text{CDCl}_3$ )  $\delta = 192.1, 176.1, 138.9, 133.8, 129.5, 128.9, 57.1, 44.6, 28.0, 21.3$ . ESI-HRMS: calcd for  $[\text{C}_{20}\text{H}_{18}^{78,9183}\text{BrNO}_3 + \text{Na}^+]$  422.0363, found 422.0362; ESI-HRMS: calcd for  $[\text{C}_{20}\text{H}_{18}^{80,9163}\text{BrNO}_3 + \text{Na}^+]$  424.0342, found 424.0344.

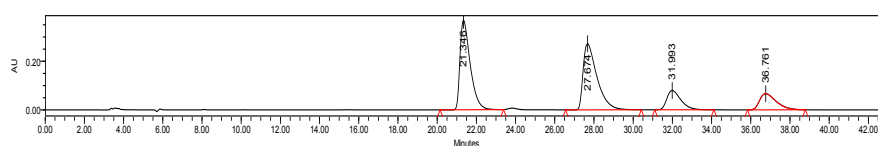

|   | Retention Time | % Area |
|---|----------------|--------|
| 1 | 21.346         | 38.67  |
| 2 | 27.674         | 38.57  |
| 3 | 31.993         | 11.44  |
| 4 | 36.761         | 11.33  |

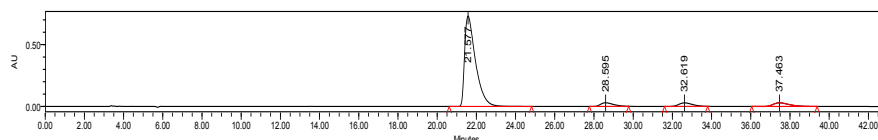

|   | Retention Time | % Area |
|---|----------------|--------|
| 1 | 21.577         | 86.61  |
| 2 | 28.595         | 4.06   |
| 3 | 32.619         | 4.19   |
| 4 | 37.463         | 5.14   |

**1-((1*R*,2*R*)-2-Bromo-1-(4-fluorophenyl)-3-oxo-3-phenylpropyl)pyrrolidine-2,5-dione 3e**

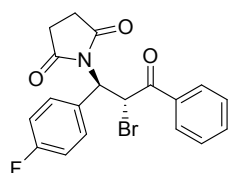

Yield: 33.8 mg (84%), white amorphous solid, 90:10 dr [determined by the ratio of area at  $\delta 6.00$  (d,  $J = 11.6$  Hz, 0.10H) and  $\delta 5.81$  (d,  $J = 11.2$  Hz, 0.90H) in  $^1\text{H}$  NMR], 91% ee;  $[\alpha]^{28.0}_{\text{D}} = 129.2$  ( $c = 0.13$ ,  $\text{CH}_2\text{Cl}_2$ ); HPLC (Daicel chiralcel IE, *n*-hexane/*i*-PrOH 90/10, 1.0 mL/min, 254 nm)  $t_{\text{R}(\text{major})} = 15.20$  min,  $t_{\text{R}(\text{minor})} =$



20.88 min;  $^1\text{H}$  NMR (400 MHz,  $\text{CDCl}_3$ )  $\delta$  = 8.03 (d,  $J$  = 8.0 Hz, 1.80H), 7.94 (d,  $J$  = 8.0 Hz, 0.20H), 7.65 – 7.49 (m, 5H), 7.08 (t,  $J$  = 8.8 Hz, 1.80H), 6.92 (t,  $J$  = 8.4 Hz, 0.20H), 6.76 (d,  $J$  = 11.2 Hz, 0.10H), 6.58 (d,  $J$  = 10.8 Hz, 0.90H), 6.00 (d,  $J$  = 11.6 Hz, 0.10H), 5.81 (d,  $J$  = 11.2 Hz, 0.90H), 2.76 – 2.51 (m, 4H).  $^{13}\text{C}$  NMR (100 MHz,  $\text{CDCl}_3$ )  $\delta$  = 191.8, 176.7, 164.1, 161.7, 134.1, 132.6, 130.9, 130.8, 128.9, 128.9, 115.9, 115.7, 56.7, 44.4, 28.0. ESI-HRMS: calcd for  $[\text{C}_{19}\text{H}_{15}^{78,9183}\text{BrFNO}_3+\text{Na}^+]$  426.0112, found 426.0121; ESI-HRMS: calcd for  $[\text{C}_{19}\text{H}_{15}^{80,9163}\text{BrClNO}_3+\text{Na}^+]$  428.0092, found 428.0103.

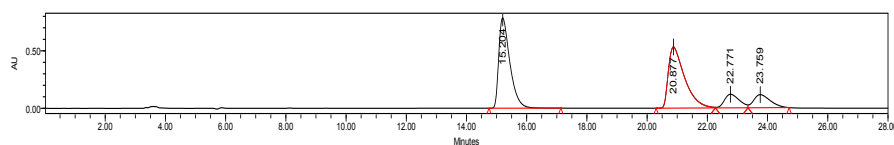

|   | Retention Time | % Area |
|---|----------------|--------|
| 1 | 15.204         | 41.58  |
| 2 | 20.877         | 41.05  |
| 3 | 22.771         | 8.38   |
| 4 | 23.759         | 9.00   |

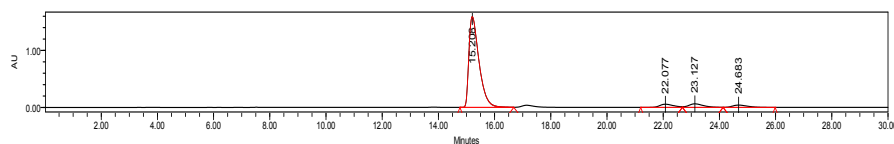

|   | Retention Time | % Area |
|---|----------------|--------|
| 1 | 15.208         | 87.67  |
| 2 | 22.077         | 4.19   |
| 3 | 23.127         | 4.91   |
| 4 | 24.683         | 3.24   |

### 1-((1*R*,2*R*)-2-Bromo-1-(3-chlorophenyl)-3-oxo-3-phenylpropyl)pyrrolidine-2,5-dione **3f**

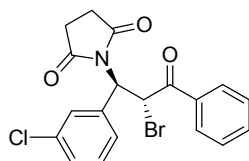

Yield: 38.4 mg (92%), white amorphous solid, 89:11 dr [determined by the ratio of area of  $\delta$  5.98 (d,  $J$  = 10.8 Hz, 0.11H) and 5.78 (d,  $J$  = 11.2 Hz, 0.89H) in  $^1\text{H}$  NMR], 86% ee;  $[\alpha]^{24.9}_{\text{D}}$  = 123.4 ( $c$  = 0.09,  $\text{CH}_2\text{Cl}_2$ ); HPLC (Daicel chiralcel IE,  $n$ -hexane/ $i$ -PrOH 90/10, 1.0 mL/min, 254 nm)  $t_{\text{R}(\text{major})}$  = 15.18 min,  $t_{\text{R}(\text{minor})}$  = 18.48 min;  $^1\text{H}$  NMR (400 MHz,  $\text{CDCl}_3$ )  $\delta$  = 8.04 (d,  $J$  = 7.6 Hz, 1.78H), 7.96 (d,  $J$  = 7.6

Hz, 0.22H), 7.67 – 6.47 (m, 5H), 7.35 – 7.31 (m, 1.78H), 7.21 – 7.15 (m, 0.22H), 6.76 (d,  $J = 11.2$  Hz 0.11H), 6.57 (d,  $J = 11.2$  Hz 0.89H), 5.98 (d,  $J = 10.8$  Hz, 0.11H), 5.78 (d,  $J = 11.2$  Hz, 0.89H), 2.17 – 2.58 (m, 4H).  $^{13}\text{C}$  NMR (100 MHz,  $\text{CDCl}_3$ )  $\delta = 191.7, 176.6, 138.6, 134.7, 134.1, 133.6, 130.1, 129.3, 128.9, 127.5, 56.9, 44.1, 28.0$ . ESI-HRMS: calcd for  $[\text{C}_{19}\text{H}_{15}^{78,9183}\text{BrClNO}_3+\text{Na}^+]$  441.9817, found 441.9825; ESI-HRMS: calcd for  $[\text{C}_{19}\text{H}_{15}^{80,9163}\text{BrClNO}_3+\text{Na}^+]$  443.9796, found 443.9799.

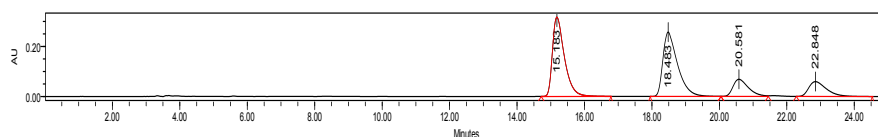

|   | Retention Time | % Area |
|---|----------------|--------|
| 1 | 15.183         | 39.20  |
| 2 | 18.483         | 38.93  |
| 3 | 20.581         | 10.97  |
| 4 | 22.848         | 10.89  |

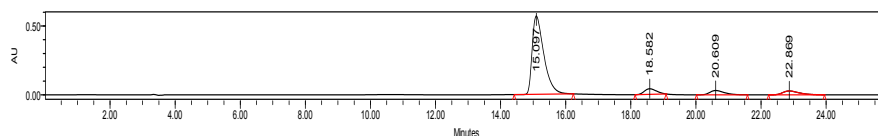

|   | Retention Time | % Area |
|---|----------------|--------|
| 1 | 15.097         | 82.55  |
| 2 | 18.582         | 6.10   |
| 3 | 20.609         | 5.57   |
| 4 | 22.869         | 5.78   |

### 1-((1*R*,2*R*)-2-Bromo-1-(4-chlorophenyl)-3-oxo-3-phenylpropyl)pyrrolidine-2,5-dione **3g**

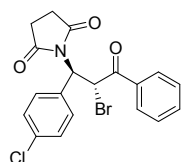

Yield: 35.5 mg (85%), white amorphous solid, 91:9 dr [determined by the ratio of area at  $\delta$  5.99 (d,  $J = 11.2$  Hz, 0.09H) and  $\delta$  5.78 (d,  $J = 10.8$  Hz, 0.91H) in  $^1\text{H}$  NMR], 92% ee;  $[\alpha]^{24.9}_{\text{D}} = 54.8$  ( $c = 0.75$ ,  $\text{CH}_2\text{Cl}_2$ ); HPLC (Daicel chiralcel ID, *n*-hexane/*i*-PrOH 90/10, 1.0 mL/min, 254 nm)  $t_{\text{R}(\text{major})} = 16.29$  min,  $t_{\text{R}(\text{minor})} = 25.33$  min;  $^1\text{H}$  NMR (400 MHz,  $\text{CDCl}_3$ )  $\delta = 8.03$  (d,  $J = 7.2$  Hz, 1.82H), 7.94 (d,  $J = 7.6$  Hz, 0.18H), 7.64 – 7.44 (m, 5H), 7.37 (d,  $J = 8.4$  Hz, 1.82H), 7.20 (d,  $J = 8.4$  Hz, 0.18H), 6.75 (d,  $J = 11.6$  Hz,

0.09H), 6.58 (d,  $J = 10.8$  Hz, 0.91H), 5.99 (d,  $J = 11.2$  Hz, 0.09H), 5.78 (d,  $J = 10.8$  Hz, 0.91H), 2.76 – 2.50 (m, 4H).  $^{13}\text{C}$  NMR (100 MHz,  $\text{CDCl}_3$ )  $\delta = 191.7, 176.6, 135.2, 134.9, 134.1, 133.7, 130.4, 129.1, 129.0, 128.9, 56.7, 44.1, 28.0$ . ESI-HRMS: calcd for  $[\text{C}_{19}\text{H}_{15}^{78.9183}\text{BrClNO}_3 + \text{Na}^+]$  441.9817, found 441.9824; ESI-HRMS: calcd for  $[\text{C}_{19}\text{H}_{15}^{80.9163}\text{BrClNO}_3 + \text{Na}^+]$  443.9796, found 443.9795.

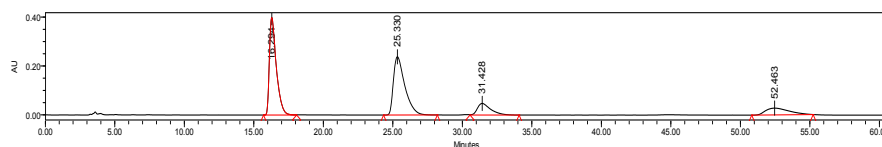

|   | Retention Time | % Area |
|---|----------------|--------|
| 1 | 16.294         | 40.76  |
| 2 | 25.330         | 40.21  |
| 3 | 31.428         | 9.32   |
| 4 | 52.463         | 9.71   |

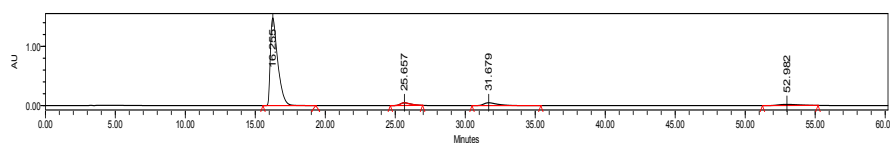

|   | Retention Time | % Area |
|---|----------------|--------|
| 1 | 16.255         | 87.67  |
| 2 | 25.657         | 4.09   |
| 3 | 31.679         | 4.71   |
| 4 | 52.982         | 3.53   |

### 1-((1*R*,2*R*)-2-Bromo-1-(4-bromophenyl)-3-oxo-3-phenylpropyl)pyrrolidine-2,5-dione **3h**

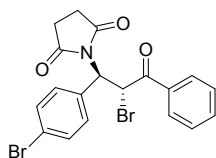

Yield: 38.8 mg (84%), white amorphous solid, 90:10 dr [determined by the ratio of area at  $\delta$  5.97 (d,  $J = 11.2$  Hz, 0.10H) and  $\delta$  5.78 (d,  $J = 11.6$  Hz, 0.90H) in  $^1\text{H}$  NMR], 92% ee;  $[\alpha]^{28.0}_{\text{D}} = 59.6$  ( $c = 0.10, \text{CH}_2\text{Cl}_2$ ); HPLC (Daicel chiralcel ID, *n*-hexane/ *i*-PrOH 90/10, 1.0 mL/min, 254 nm)  $t_{\text{R}(\text{major})} = 18.49$  min,  $t_{\text{R}(\text{minor})} = 29.11$  min;  $^1\text{H}$  NMR (400 MHz,  $\text{CDCl}_3$ )  $\delta = 8.03$  (d,  $J = 7.6$  Hz, 1.80H), 7.94(d,  $J = 7.6$  Hz, 0.20H), 7.64 – 7.35 (m, 7H), 6.75 (d,  $J = 11.6$  Hz, 0.10H), 6.58 (d,  $J = 10.8$  Hz, 0.90H), 5.97 (d,  $J = 11.2$  Hz, 0.10H), 5.78 (d,  $J = 11.6$  Hz, 0.90H), 2.76 – 2.51 (m, 4H).  $^{13}\text{C}$  NMR (100 MHz,  $\text{CDCl}_3$ )

$\delta = 191.7, 176.6, 135.7, 134.1, 133.7, 132.1, 130.7, 129.0, 128.9, 123.2, 56.8, 44.0, 28.0$ . ESI-HRMS calcd for  $[\text{C}_{19}\text{H}_{15}^{78,9183}\text{Br}_2\text{NO}_3+\text{Na}^+]$  485.9311, found 485.9317; ESI-HRMS: calcd for  $[\text{C}_{19}\text{H}_{15}^{78,9183}\text{Br}^{80,9163}\text{BrNO}_3+\text{Na}^+]$  487.9291, found 487.9288; ESI-HRMS: calcd for  $[\text{C}_{19}\text{H}_{15}^{80,9163}\text{Br}_2\text{NO}_3+\text{Na}^+]$  489.9270, found 489.9274.

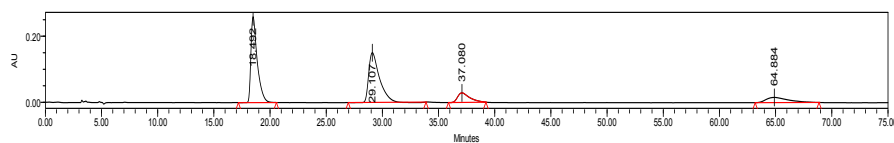

|   | Retention Time | % Area |
|---|----------------|--------|
| 1 | 18.492         | 41.36  |
| 2 | 29.107         | 41.16  |
| 3 | 37.080         | 8.77   |
| 4 | 64.884         | 8.71   |

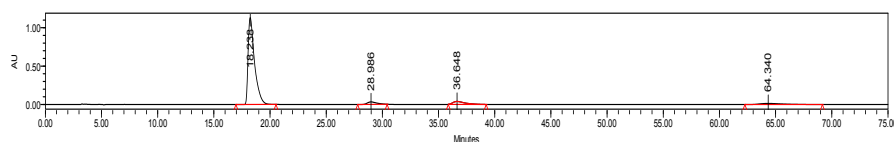

|   | Retention Time | % Area |
|---|----------------|--------|
| 1 | 18.238         | 87.01  |
| 2 | 28.986         | 3.61   |
| 3 | 36.648         | 5.59   |
| 4 | 64.340         | 3.79   |

#### 4-((1*R*,2*R*)-2-Bromo-1-(2,5-dioxopyrrolidin-1-yl)-3-oxo-3-phenylpropyl)benzonitrile 3i

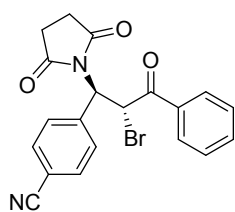

Yield: 29.9 mg (73%), white amorphous solid, 91:9 dr [determined by the ratio of area at  $\delta$  6.04 (d,  $J = 11.6$  Hz, 0.09H) and  $\delta$  5.86 (d,  $J = 10.8$  Hz, 0.91H) in  $^1\text{H}$  NMR], 94% ee;  $[\alpha]^{24.9}_{\text{D}} = 50.4$  ( $c = 0.71$ ,  $\text{CH}_2\text{Cl}_2$ ); HPLC (Daicel chiralcel IE, *n*-hexane/*i*-PrOH 90/10, 1.0 mL/min, 254 nm)  $t_{\text{R}(\text{major})} = 44.98$  min,  $t_{\text{R}(\text{minor})} = 81.49$  min;  $^1\text{H}$  NMR (400 MHz,  $\text{CDCl}_3$ )  $\delta = 8.03$  (d,  $J = 7.2$  Hz, 1.82H), 7.95 (d,  $J = 7.6$  Hz, 0.18H), 7.79 (d, 2H), 7.71 – 7.62 (m, 3H), 7.54 – 7.46 (m, 2H), 6.77 (d,  $J = 11.6$  Hz, 0.09H), 6.60 (d,  $J = 10.8$  Hz, 0.91H), 6.04 (d,  $J = 11.6$  Hz, 0.09H), 5.86 (d,  $J = 10.8$  Hz, 0.91H), 2.79 – 2.55 (m, 4H).  $^{13}\text{C}$  NMR (100 MHz,  $\text{CDCl}_3$ )  $\delta = 191.4, 176.6, 141.6, 133.5, 129.9,$

128.9, 118.3, 113.0, 55.9, 43.3, 28.0. ESI-HRMS: calcd for  $[C_{20}H_{15}^{78,9183}BrN_2O_3+Na^+]$  433.0159, found 433.0165; ESI-HRMS: calcd for  $[C_{20}H_{15}^{80,9163}BrN_2O_3+Na^+]$  435.0138, found 435.0147.

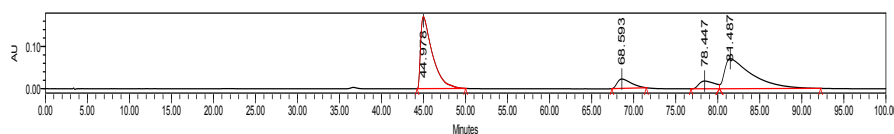

|   | Retention Time | % Area |
|---|----------------|--------|
| 1 | 44.978         | 44.37  |
| 2 | 68.593         | 6.83   |
| 3 | 78.447         | 6.22   |
| 4 | 81.487         | 42.58  |

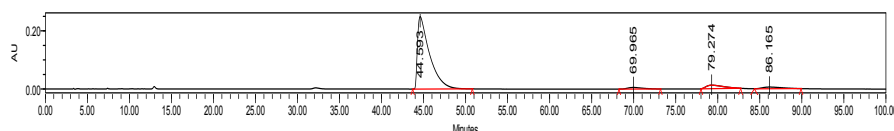

|   | Retention Time | % Area |
|---|----------------|--------|
| 1 | 44.593         | 88.33  |
| 2 | 69.965         | 2.26   |
| 3 | 79.274         | 6.08   |
| 4 | 86.165         | 3.34   |

### 1-((1R,2R)-2-Bromo-1-(4-nitrophenyl)-3-oxo-3-phenylpropyl)pyrrolidine-2,5-dione 3j

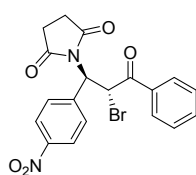

Yield: 32.3 mg (75%), white amorphous solid, 91:9 dr [determined by the ratio of area at  $\delta = 6.10$  (d,  $J = 11.2$  Hz, 0.09H) and  $\delta 5.93$  (d,  $J = 10.8$  Hz, 0.91H) in  $^1H$  NMR ], 92% ee;  $[\alpha]^{28.0}_D = 58.4$  ( $c = 0.65$ ,  $CH_2Cl_2$ ); HPLC (Daicel chiralcel IE, *n*-hexane/*i*-PrOH 80/20, 1.0 mL/min, 254 nm)  $t_{R(major)} = 19.18$  min,  $t_{R(minor)} = 32.48$  min;  $^1H$  NMR (400 MHz,  $CDCl_3$ )  $\delta$  8.23 (d, 2H), 8.04 (d,  $J = 7.6$  Hz, 1.82H), 7.95 (d,  $J = 7.6$  Hz, 0.18H), 7.85 (d,  $J = 8.4$  Hz, 1.82H), 7.75 (d,  $J = 8.8$  Hz, 0.18H), 7.66 – 7.45 (m, 3H), 6.80 (d,  $J = 11.6$  Hz, 0.09H), 6.63 (d,  $J = 10.8$  Hz, 0.91H), 6.10 (d,  $J = 11.2$  Hz, 0.09H), 5.93 (d,  $J = 10.8$  Hz, 0.91H), 2.81 – 2.58 (m, 4H).  $^{13}C$  NMR (100 MHz,  $CDCl_3$ )  $\delta = 191.3, 176.6, 148.1, 143.4, 130.2, 129.0, 129.0, 124.1, 56.6, 43.3, 28.0$ . ESI-HRMS: calcd for  $[C_{19}H_{15}^{78,9183}BrN_2O_5+Na^+]$  453.0057, found 453.0060; ESI-HRMS: calcd for  $[C_{19}H_{15}^{80,9163}BrN_2O_5+Na^+]$  455.0037, found 455.0052.

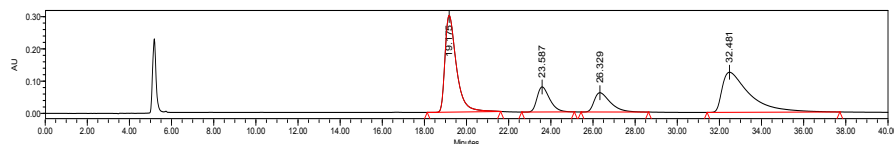

|   | Retention Time | % Area |
|---|----------------|--------|
| 1 | 19.175         | 38.87  |
| 2 | 23.587         | 11.19  |
| 3 | 26.329         | 11.05  |
| 4 | 32.481         | 38.89  |

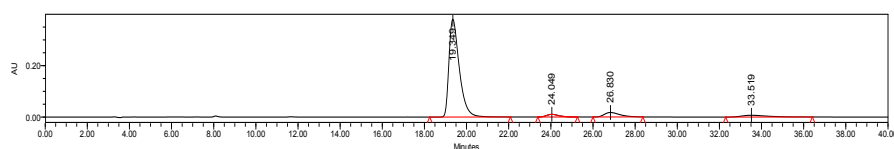

|   | Retention Time | % Area |
|---|----------------|--------|
| 1 | 19.349         | 87.22  |
| 2 | 24.049         | 2.78   |
| 3 | 26.830         | 6.09   |
| 4 | 33.519         | 3.90   |

### 1-((1*R*,2*R*)-2-Bromo-1-(naphthalen-2-yl)-3-oxo-3-phenylpropyl)pyrrolidine-2,5-dione **3k**

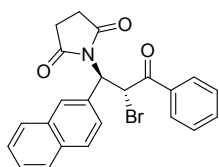

Yield: 34.4 mg (79%), white amorphous solid, 88:12 dr [determined by the ratio of area at  $\delta$  6.20 (d,  $J = 11.6$  Hz, 0.12H) and  $\delta$  5.99 (d,  $J = 11.2$  Hz, 0.88H) in  $^1\text{H}$  NMR], 88% ee; HPLC (Daicel chiralcel ID, *n*-hexane/*i*-PrOH 90/10, 1.0 mL/min, 254 nm)  $t_{\text{R(major)}}$  = 15.45 min,  $t_{\text{R(minor)}}$  = 20.50 min;  $^1\text{H}$  NMR (400 MHz,  $\text{CDCl}_3$ )  $\delta$  = 8.12 – 7.94 (m, 3H), 7.90 – 7.60 (m, 5H), 7.54 – 7.40 (m, 4H), 6.95 (d,  $J = 11.6$  Hz, 0.12 H), 6.76 (d,  $J = 11.2$  Hz, 0.88 H), 6.20 (d,  $J = 11.6$  Hz, 0.12H), 5.99 (d,  $J = 11.2$  Hz, 0.88H), 2.73 – 2.48 (m, 4H).  $^{13}\text{C}$  NMR (100 MHz,  $\text{CDCl}_3$ )  $\delta$  = 192.0, 176.8, 134.1, 134.0, 133.8, 133.4, 133.1, 128.9, 128.8, 128.5, 128.3, 127.7, 128.5, 128.3, 127.7, 127.5, 126.7, 126.5, 125.9, 57.6, 44.4, 28.0. ESI-HRMS: calcd for  $[\text{C}_{23}\text{H}_{18}^{78,9183}\text{BrNO}_3 + \text{Na}^+]$  458.0363, found 458.0365; ESI-HRMS: calcd for  $[\text{C}_{23}\text{H}_{18}^{80,9163}\text{BrNO}_3 + \text{Na}^+]$  460.0342, found 460.0348.

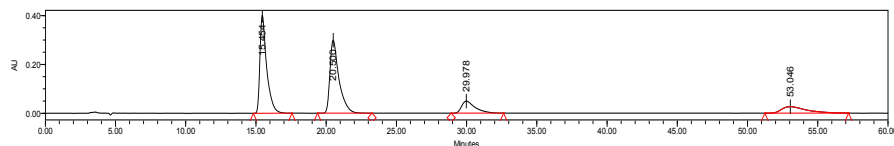

|   | Retention Time | % Area |
|---|----------------|--------|
| 1 | 15.454         | 40.30  |
| 2 | 20.500         | 40.09  |
| 3 | 29.978         | 9.85   |
| 4 | 53.046         | 9.76   |

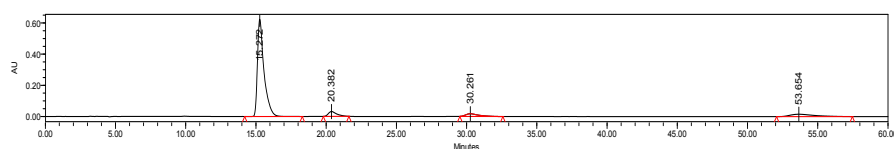

|   | Retention Time | % Area |
|---|----------------|--------|
| 1 | 15.272         | 82.74  |
| 2 | 20.382         | 5.34   |
| 3 | 30.261         | 4.46   |
| 4 | 53.654         | 7.45   |

### 1-((1*R*,2*R*)-2-Bromo-3-oxo-3-phenyl-1-(thiophen-3-yl)propyl)pyrrolidine-2,5-dione 3l

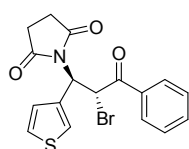

Yield: 34.1 mg (87%), white amorphous solid, 90:10 dr [determined by the ratio of area at  $\delta$  6.15 (d,  $J$  = 11.2 Hz, 0.10H) and  $\delta$  5.96 (d,  $J$  = 11.2 Hz, 0.90H) in  $^1\text{H}$  NMR], 92% ee; HPLC (Daicel chiralcel IE, *n*-hexane/*i*-PrOH 90/10, 1.0 mL/min, 254 nm)  $t_{\text{R(major)}}$  = 23.05 min,  $t_{\text{R(minor)}}$  = 30.24 min;  $^1\text{H}$  NMR (400 MHz,  $\text{CDCl}_3$ )  $\delta$  = 8.03 – 7.93 (m, 2H), 7.64 – 7.46 (m, 4H), 7.37 – 7.33 (m, 1.76H), 7.21 – 7.16 (m, 0.23H), 6.65 (d,  $J$  = 11.2 Hz, 0.10 H), 6.57 (d,  $J$  = 11.2 Hz, 0.90 H), 6.15 (d,  $J$  = 11.2 Hz, 0.10H), 5.96 (d,  $J$  = 11.2 Hz, 0.90H), 2.77 – 2.53 (m, 4H).  $^{13}\text{C}$  NMR (100 MHz,  $\text{CDCl}_3$ )  $\delta$  = 192.0, 176.4, 136.7, 134.1, 133.8, 128.9, 128.8, 127.5, 126.4, 125.8, 52.2, 44.4, 27.9. ESI-HRMS: calcd for  $[\text{C}_{17}\text{H}_{14}^{78,9183}\text{BrNO}_3\text{S}+\text{Na}^+]$  413.9770, found 413.9771; ESI-HRMS: calcd for  $[\text{C}_{17}\text{H}_{148}^{80,9163}\text{BrNO}_3\text{S}+\text{Na}^+]$  415.9750, found 415.9752.

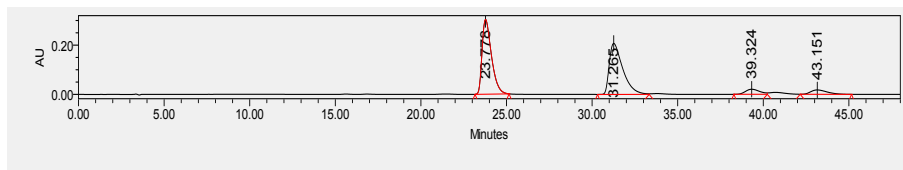

|   | Retention Time | % Area |
|---|----------------|--------|
| 1 | 23.778         | 45.61  |
| 2 | 31.265         | 44.90  |
| 3 | 39.324         | 4.75   |
| 4 | 43.151         | 4.73   |

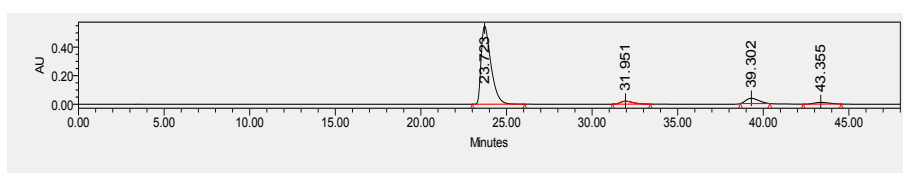

|   | Retention Time | % Area |
|---|----------------|--------|
| 1 | 23.723         | 85.44  |
| 2 | 31.951         | 4.21   |
| 3 | 39.302         | 7.56   |
| 4 | 43.355         | 2.79   |

**1-((2*R*,3*R*)-2-Bromo-1-oxo-1-phenyloctan-3-yl)pyrrolidine-2,5-dione**

**3m**

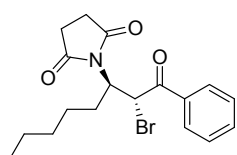

Yield: 34.2 mg (90%), white amorphous solid, 80:20 dr [determined by the ratio of area at  $\delta$  4.95 (td,  $J = 3.2$  Hz, 10.8 Hz, 0.2H) and  $\delta$  4.79 (td,  $J = 3.2$  Hz, 10.8 Hz, 0.8H) in  $^1\text{H}$  NMR], 11% ee; HPLC (Daicel chiralcel IE, *n*-hexane/*i*-PrOH 90/10, 1.0 mL/min, 254 nm)  $t_{\text{R(major)}}$  = 14.47 min,  $t_{\text{R(minor)}}$  = 20.09 min;  $^1\text{H}$  NMR (400 MHz,  $\text{CDCl}_3$ )  $\delta$  = 8.05 – 7.92 (m, 2H), 7.63 – 7.45 (m, 3H), 6.02 (d, 1H), 4.95 (td,  $J = 3.2$  Hz, 10.8 Hz, 0.2H), 4.79 (td,  $J = 3.2$  Hz, 10.8 Hz, 0.8H), 2.80 – 2.58 (m, 4H), 2.24 – 2.04 (m, 2H), 1.36 – 1.20 (m, 6H), 0.90 – 0.81 (m, 3H).  $^{13}\text{C}$  NMR (100 MHz,  $\text{CDCl}_3$ )  $\delta$  = 192.3, 176.8, 133.9, 128.9, 128.9, 53.2, 45.2, 31.3, 29.1, 27.9, 25.6, 22.5, 14.0. ESI-HRMS: calcd for  $[\text{C}_{18}\text{H}_{22}^{78.9183}\text{BrNO}_3+\text{Na}^+]$  402.0676, found 402.0677; ESI-HRMS: calcd for  $[\text{C}_{18}\text{H}_{22}^{80.9163}\text{BrNO}_3+\text{Na}^+]$  404.0655, found 404.0663.



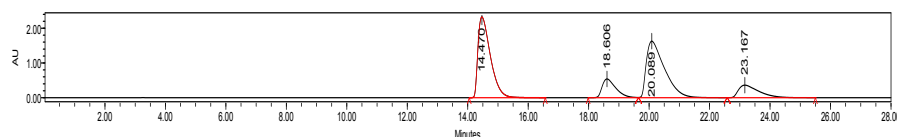

|   | Retention Time | % Area |
|---|----------------|--------|
| 1 | 14.470         | 39.50  |
| 2 | 18.606         | 10.07  |
| 3 | 20.089         | 40.39  |
| 4 | 23.167         | 10.04  |

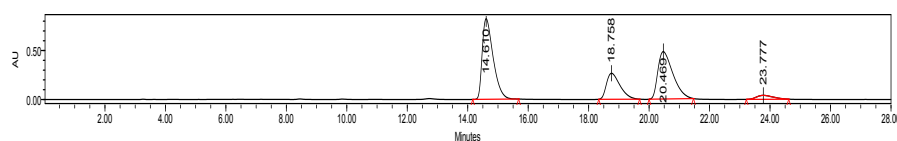

|   | Retention Time | % Area |
|---|----------------|--------|
| 1 | 14.610         | 43.86  |
| 2 | 18.758         | 17.46  |
| 3 | 20.469         | 35.42  |
| 4 | 23.777         | 3.26   |

**(2*R*,3*R*)-Tert-butyl 3-bromo-2-(2,5-dioxopyrrolidin-1-yl)-4-oxo-4-phenylbutanoate 3n**

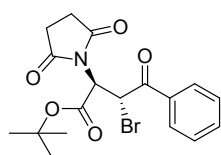

Yield: 26.2 mg (64%), white amorphous solid, 70:30 dr [determined by the ratio of area at  $\delta$  5.72 (d,  $J$  = 10.8 Hz, 0.3H) and  $\delta$  5.32 (d,  $J$  = 10.4 Hz, 0.7H) in  $^1\text{H}$  NMR], 30% ee; HPLC (Daicel chiralcel IE, *n*-hexane/*i*-PrOH 90/10, 1.0 mL/min, 254 nm)  $t_{\text{R(major)}}$  = 27.81 min,  $t_{\text{R(minor)}}$  = 38.76 min;  $^1\text{H}$  NMR (400 MHz,  $\text{CDCl}_3$ )  $\delta$  = 8.07 – 7.96 (m, 2H), 7.63 – 7.47 (m, 3H), 6.30 (d,  $J$  = 10.0 Hz, 0.7H), 5.99 (d,  $J$  = 10.8 Hz, 0.3H), 5.72 (d,  $J$  = 10.8 Hz, 0.3H), 5.32 (d,  $J$  = 10.4 Hz, 0.7H), 2.86 – 2.61 (m, 4H), 1.51 (s, 9H).  $^{13}\text{C}$  NMR (100 MHz,  $\text{CDCl}_3$ )  $\delta$  = 191.0, 190.7, 175.8, 165.8, 164.6, 134.1, 134.0, 133.6, 129.0, 128.9, 84.7, 84.0, 55.7, 53.8, 41.5, 40.4, 28.0, 27.9, 27.6. ESI-HRMS: calcd for  $[\text{C}_{18}\text{H}_{20}^{78,9183}\text{BrNO}_5 + \text{Na}^+]$  432.0418, found 432.0418; ESI-HRMS: calcd for  $[\text{C}_{18}\text{H}_{22}^{80,9163}\text{BrNO}_3 + \text{Na}^+]$  434.0397, found 434.0394.

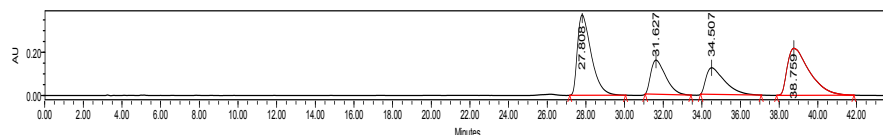

|   | Retention Time | % Area |
|---|----------------|--------|
| 1 | 27.808         | 35.18  |
| 2 | 31.627         | 16.13  |
| 3 | 34.507         | 15.71  |
| 4 | 38.759         | 32.98  |

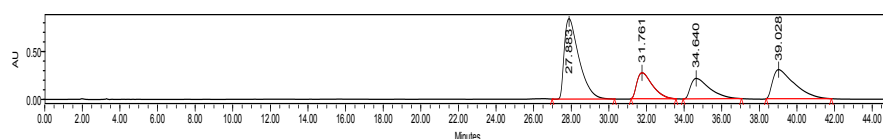

|   | Retention Time | % Area |
|---|----------------|--------|
| 1 | 27.883         | 45.39  |
| 2 | 31.761         | 15.44  |
| 3 | 34.640         | 15.03  |
| 4 | 39.028         | 24.14  |

**1-((1*R*,2*R*)-2-Bromo-3-(2-methoxyphenyl)-3-oxo-1-phenylpropyl)pyrrolidine-2,5-dione **3o****

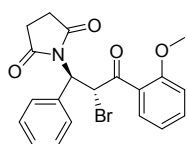

Yield: 30.3 mg (72%), white amorphous solid, 90:10 dr [determined by the ratio of area at  $\delta$  5.97 (d,  $J = 11.6$  Hz, 0.10H) and  $\delta$  5.82 (d,  $J = 11.2$  Hz, 0.90H) in  $^1\text{H NMR}$ ], 88% ee;  $[\alpha]^{28.0}_{\text{D}} = 125.7$  ( $c = 0.35$ ,  $\text{CH}_2\text{Cl}_2$ ); HPLC (Daicel chiralcel IE, *n*-hexane/*i*-PrOH 90/10, 1.0 mL/min, 254 nm)  $t_{\text{R(major)}} = 37.86$  min,  $t_{\text{R(minor)}} = 49.76$  min;  $^1\text{H NMR}$  (400 MHz,  $\text{CDCl}_3$ )  $\delta = 7.84 - 7.81$  (m, 1H), 7.66 - 7.58 (m, 2H), 7.54 - 7.49 (m, 1H), 7.41 - 7.33 (m, 2.8H), 7.19 - 7.16 (m, 0.20H), 7.05 - 6.96 (m, 2H), 6.94 - 6.84 (m, 1H),  $\delta$  5.97 (d,  $J = 11.6$  Hz, 0.10H),  $\delta$  5.82 (d,  $J = 11.2$  Hz, 0.90H), 4.01 (s, 3H), 2.56 - 2.52 (m, 4H).  $^{13}\text{C NMR}$  (100 MHz,  $\text{CDCl}_3$ )  $\delta = 193.0, 176.5, 158.9, 136.9, 134.8, 131.5, 129.3, 128.7, 128.6, 124.7, 120.9, 112.2, 57.2, 56.0, 49.4, 27.9$ . ESI-HRMS: calcd for  $[\text{C}_{20}\text{H}_{18}^{78,9183}\text{BrNO}_4 + \text{Na}^+]$  438.0312, found 438.0321; ESI-HRMS: calcd for  $[\text{C}_{20}\text{H}_{18}^{80,9163}\text{BrNO}_4 + \text{Na}^+]$  440.0291, found 440.0301.

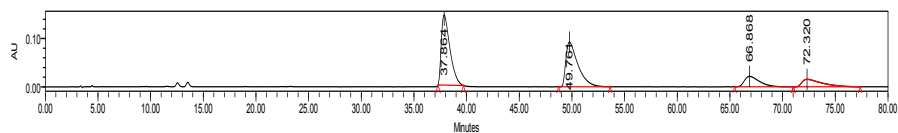

|   | Retention Time | % Area |
|---|----------------|--------|
| 1 | 37.864         | 41.72  |
| 2 | 49.761         | 37.14  |
| 3 | 66.868         | 10.90  |
| 4 | 72.320         | 10.24  |

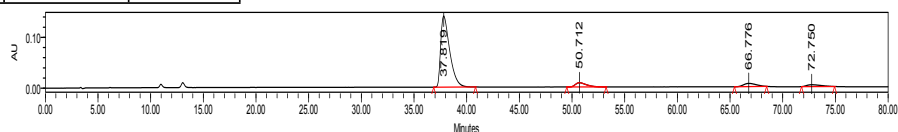

|   | Retention Time | % Area |
|---|----------------|--------|
| 1 | 37.819         | 84.98  |
| 2 | 50.712         | 6.18   |
| 3 | 66.776         | 5.33   |
| 4 | 72.750         | 3.51   |

**1-((1*R*,2*R*)-2-Bromo-3-(3-methoxyphenyl)-3-oxo-1-phenylpropyl)pyrrolidine-2,5-dione 3p**

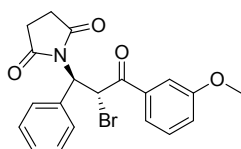

Yield: 34.5 mg (83%), white amorphous solid, 91:9 dr [determined by the ratio of area at  $\delta$  6.01 (d,  $J$  = 11.6 Hz, 0.09H) and  $\delta$  5.80 (d,  $J$  = 11.2 Hz, 0.91H) in  $^1\text{H NMR}$  ], 90% ee;  $[\alpha]^{28.0}_{\text{D}} = 73.0$  ( $c$  = 0.53,  $\text{CH}_2\text{Cl}_2$ );

HPLC (Daicel chiralcel IE,  $n$ -hexane/  $i$ -PrOH 80/20, 1.0 mL/min, 254 nm)  $t_{\text{R}(\text{major})} = 27.72$  min,  $t_{\text{R}(\text{minor})} = 32.55$  min;  $^1\text{H NMR}$  (400 MHz,  $\text{CDCl}_3$ )  $\delta$  = 7.80 – 7.57 (m, 4H), 7.44 – 7.35 (m, 4H), 7.17 – 7.13 (m, 1H), 6.80 (d,  $J$  = 11.2 Hz, 0.09H), 6.60 (d,  $J$  = 11.2 Hz, 0.91H), 6.01 (d,  $J$  = 11.6 Hz, 0.09H), 5.80 (d,  $J$  = 11.2 Hz, 0.91H), 3.87 (s, 3H), 2.75 – 2.51 (m, 4H),  $^{13}\text{C NMR}$  (100 MHz,  $\text{CDCl}_3$ )  $\delta$  = 191.9, 160.0, 136.7, 135.1, 128.9, 120.6, 113.2, 57.4, 55.5, 44.6, 28.0. ESI-HRMS: calcd for  $[\text{C}_{20}\text{H}_{18}^{78,9183}\text{BrNO}_4 + \text{Na}^+]$  38.0312, found 438.0316; ESI-HRMS: calcd for  $[\text{C}_{20}\text{H}_{18}^{80,9163}\text{BrNO}_4 + \text{Na}^+]$  440.0291, found 440.0294.

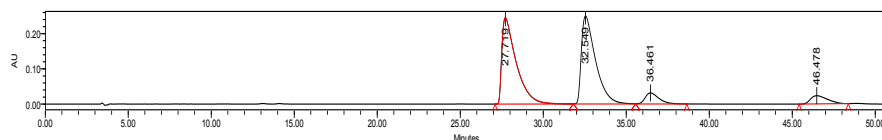

|   | Retention Time | % Area |
|---|----------------|--------|
| 1 | 27.719         | 44.61  |
| 2 | 32.549         | 44.99  |
| 3 | 36.461         | 5.49   |
| 4 | 46.478         | 4.92   |

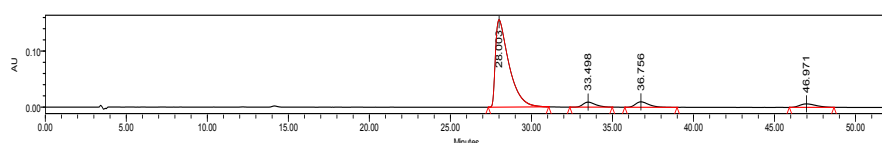

|   | Retention Time | % Area |
|---|----------------|--------|
| 1 | 28.003         | 86.09  |
| 2 | 33.498         | 4.50   |
| 3 | 36.756         | 5.29   |
| 4 | 46.971         | 4.12   |

### 1-((1*R*,2*R*)-2-Bromo-3-(4-methoxyphenyl)-3-oxo-1-phenylpropyl)pyrrolidine-2,5-dione **3q**

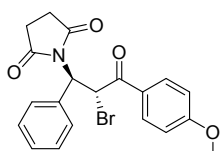

Yield: 36.1 mg (87%), white amorphous solid, 92:8 dr [determined by the ratio of area at  $\delta$  6.02 (d,  $J$  = 11.2 Hz, 0.08H) and  $\delta$  5.82 (d,  $J$  = 11.2 Hz, 0.92H) in  $^1\text{H}$  NMR], 91% ee;  $[\alpha]^{24.9}_{\text{D}} = 40.6$  ( $c$  = 0.66,  $\text{CH}_2\text{Cl}_2$ ); HPLC (Daicel chiralcel IE, *n*-hexane/ *i*-PrOH 80/20, 1.0 mL/min, 254 nm)  $t_{\text{R(major)}}$  = 31.96 min,  $t_{\text{R(minor)}}$  = 35.27 min;  $^1\text{H}$  NMR (400 MHz,  $\text{CDCl}_3$ )  $\delta$  8.03 (d,  $J$  = 8.8 Hz 1.84H), 7.94 (d,  $J$  = 8.8 Hz 0.16H), 7.67 – 7.53 (m, 2H), 7.42 – 7.35 (m, 2.76H), 7.23 – 7.21 (m, 0.24H), 6.97 (d,  $J$  = 9.2 Hz, 1.84H), 6.92 (d,  $J$  = 8.8 Hz, 0.16H), 6.79 (d,  $J$  = 13.2 Hz, 0.08H), 6.61 (d,  $J$  = 11.2 Hz, 0.92H), 6.02 (d,  $J$  = 11.2 Hz, 0.08H), 5.82 (d,  $J$  = 11.2 Hz, 0.92H), 3.89 (s, 3H), 2.74-2.45 (m, 4H).  $^{13}\text{C}$  NMR (100 MHz,  $\text{CDCl}_3$ )  $\delta$  = 190.5, 176.7, 164.3, 136.8, 131.4, 129.1, 128.9, 128.8, 126.6, 114.2, 57.5, 55.6, 44.3, 28.0. ESI-HRMS: calcd for  $[\text{C}_{20}\text{H}_{18}^{78,9183}\text{BrNO}_4 + \text{Na}^+]$  438.0312, found 438.0304 ; ESI-HRMS: calcd for  $[\text{C}_{20}\text{H}_{18}^{80,9163}\text{BrNO}_4 + \text{Na}^+]$  440.0291, found 440.0284.

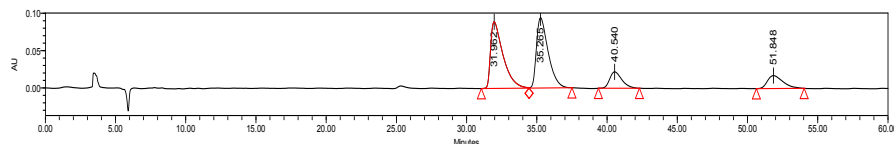

|   | Retention Time | % Area |
|---|----------------|--------|
| 1 | 31.962         | 40.49  |
| 2 | 35.265         | 39.98  |
| 3 | 40.540         | 9.70   |
| 4 | 51.848         | 9.83   |

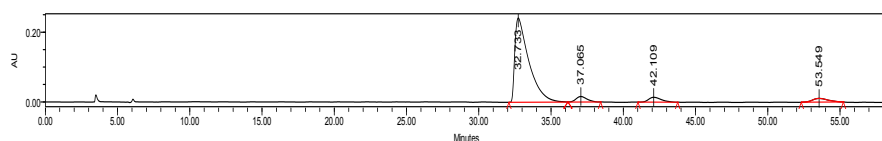

|   | Retention Time | % Area |
|---|----------------|--------|
| 1 | 32.733         | 86.71  |
| 2 | 37.065         | 4.49   |
| 3 | 42.109         | 4.50   |
| 4 | 53.549         | 4.30   |

### 1-((1*R*,2*R*)-2-Bromo-3-oxo-1-phenyl-3-(*m*-tolyl)propyl)pyrrolidine-2,5-dione

**3r**

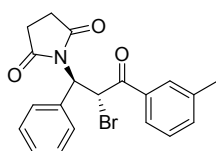

Yield: 33.9 mg (85%), white amorphous solid, 90/10 dr [determined by ratio of area at  $\delta$  6.02 (d,  $J = 11.6$  Hz, 0.10H) and  $\delta$  5.81 (d,  $J = 11.2$  Hz, 0.90H) in  $^1\text{H NMR}$ ], 91% ee;  $[\alpha]^{28.0}_{\text{D}} = 187.5$  ( $c = 0.10$ ,  $\text{CH}_2\text{Cl}_2$ ); HPLC (Daicel chiralcel IE, *n*-hexane/*i*-PrOH 90/10, 1.0 mL/min, 254 nm)  $t_{\text{R(major)}} = 20.86$  min,  $t_{\text{R(minor)}} = 27.62$  min;  $^1\text{H NMR}$  (400 MHz,  $\text{CDCl}_3$ )  $\delta = 7.85 - 7.74$  (m, 2H), 7.67 - 7.54 (m, 2H), 7.43 - 7.35 (m, 4.70H), 7.24 - 7.21 (m, 0.30H), 6.81 (d,  $J = 11.2$  Hz, 0.10H), 6.61 (d,  $J = 10.8$  Hz, 0.90H), 6.02 (d,  $J = 11.6$  Hz, 0.10H), 5.81 (d,  $J = 11.2$  Hz, 0.90H), 2.74 - 2.49 (m, 4H), 2.43(s, 3H).  $^{13}\text{C NMR}$  (100 MHz,  $\text{CDCl}_3$ )  $\delta = 192.2, 138.8, 136.7, 134.9, 133.8, 129.0, 128.8, 1126.2, 100.0, 57.4, 44.6, 28.0, 21.2$ . ESI-HRMS: calcd for  $[\text{C}_{20}\text{H}_{18}^{78,9183}\text{BrNO}_3 + \text{Na}^+]$  422.0363, found 422.0368; ESI-HRMS: calcd for  $[\text{C}_{20}\text{H}_{118}^{80,9163}\text{BrNO}_3 + \text{Na}^+]$  424.0342, found 424.0358.

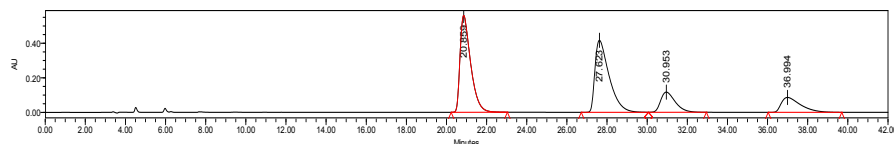

|   | Retention Time | % Area |
|---|----------------|--------|
| 1 | 20.859         | 38.97  |
| 2 | 27.623         | 38.88  |
| 3 | 30.953         | 11.23  |
| 4 | 36.994         | 10.92  |

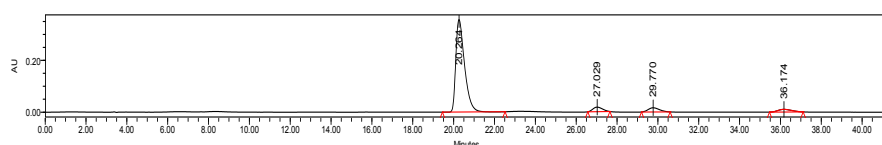

|   | Retention Time | % Area |
|---|----------------|--------|
| 1 | 20.264         | 86.45  |
| 2 | 27.029         | 4.66   |
| 3 | 29.770         | 5.00   |
| 4 | 36.174         | 3.89   |

**1-((1*R*,2*R*)-2-Bromo-3-oxo-1-phenyl-3-(*p*-tolyl)propyl)pyrrolidine-2,5-dione**

**3s**

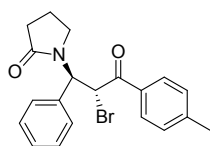

Yield: 34.2 mg (86%), white amorphous solid, 90:10 dr [determined by ratio of area at  $\delta$  6.01 (d,  $J$  = 11.6 Hz, 0.10H) and  $\delta$  5.81 (d,  $J$  = 11.2 Hz, 0.90H) in  $^1\text{H}$  NMR ], 91% ee;  $[\alpha]^{24.9}_{\text{D}}$  = 53.8 ( $c$  = 0.60,  $\text{CH}_2\text{Cl}_2$ ); HPLC (Daicel chiralcel IE, *n*-hexane/*i*-PrOH 90/10, 1.0 mL/min, 254 nm)  $t_{\text{R(major)}}$  = 20.11 min,  $t_{\text{R(minor)}}$  = 25.34 min;  $^1\text{H}$  NMR (400 MHz,  $\text{CDCl}_3$ )  $\delta$  = 7.94 (d,  $J$  = 8.0 Hz, 1.80H), 7.84 (d,  $J$  = 8.4 Hz, 0.20H), 7.67 – 7.65 (m, 2H), 7.39 – 7.29 (m, 4.6H), 7.23 – 7.20 (t, 0.4H), 6.80 (d,  $J$  = 11.2 Hz, 0.10H), 6.61 (d,  $J$  = 11.2 Hz, 0.90H), 6.01 (d,  $J$  = 11.6 Hz, 0.10H), 5.81 (d,  $J$  = 11.2 Hz, 0.90H), 2.58 – 2.49 (m, 4H), 2.42 (s, 3H).  $^{13}\text{C}$  NMR (100 MHz,  $\text{CDCl}_3$ )  $\delta$  = 191.6, 176.7, 145.1, 136.8, 131.3, 129.6, 129.1, 128.9, 128.8, 57.4, 44.5, 28.0, 21.8. ESI-HRMS: calcd for  $[\text{C}_{20}\text{H}_{18}^{78,91}\text{BrNO}_3 + \text{Na}^+]$  422.0363, found 422.0371; ESI-HRMS: calcd for  $[\text{C}_{20}\text{H}_{18}^{80,91}\text{BrNO}_3 + \text{Na}^+]$  424.0342, found 424.0352.

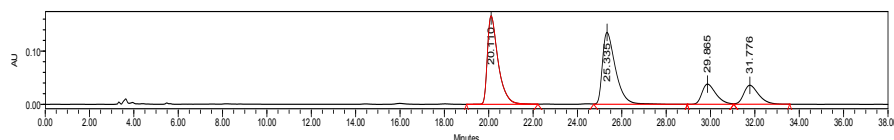

|   | Retention Time | % Area |
|---|----------------|--------|
| 1 | 20.110         | 38.57  |
| 2 | 25.335         | 38.34  |
| 3 | 29.865         | 11.55  |
| 4 | 31.776         | 11.54  |

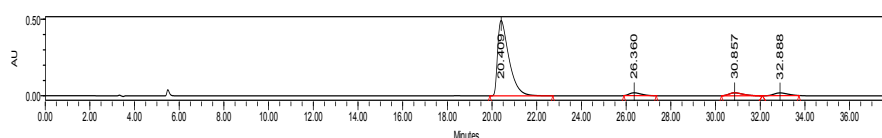

|   | Retention Time | % Area |
|---|----------------|--------|
| 1 | 20.409         | 88.42  |
| 2 | 26.360         | 3.60   |
| 3 | 30.857         | 4.18   |
| 4 | 32.888         | 3.80   |

**1-((1*R*,2*R*)-2-Bromo-3-(4-fluorophenyl)-3-oxo-1-phenylpropyl)pyrrolidine-2,5-dione 3t**

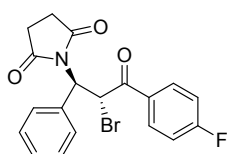

Yield: 32.6 mg (81%), white amorphous solid, 92:8 dr [determined by the ratio of area of  $\delta$  6.00 (d,  $J = 11.6$  Hz, 0.08H) and  $\delta$  5.79 (d,  $J = 11.2$  Hz, 0.92H) in  $^1\text{H NMR}$ ], 93% ee;  $[\alpha]^{24.9}_{\text{D}} = 43.8$  ( $c = 0.27$ ,  $\text{CH}_2\text{Cl}_2$ ); HPLC (Daicel chiralcel ID, *n*-hexane/*i*-PrOH 90/10, 1.0 mL/min, 254 nm)  $t_{\text{R(major)}}$  = 19.22 min,  $t_{\text{R(minor)}}$  = 24.71 min;  $^1\text{H NMR}$  (400 MHz,  $\text{CDCl}_3$ )  $\delta$  = 8.09 – 7.96(m, 2H), 7.65 – 7.39 (m, 5H), 7.23 – 7.10 (m, 2H), 6.78 (d,  $J = 11.6$  Hz, 0.08H), 6.58 (d,  $J = 10.8$  Hz, 0.92H), 6.00 (d,  $J = 11.6$  Hz, 0.08H), 5.79 (d,  $J = 11.2$  Hz, 0.92H), 2.75 – 2.49 (m, 4H).  $^{13}\text{C NMR}$  (100 MHz,  $\text{CDCl}_3$ )  $\delta$  = 190.5, 167.5, 165.0, 136.7, 131.8, 128.9, 116.3, 116.0, 57.5, 44.5, 28.0. ESI-HRMS: calcd for  $[\text{C}_{19}\text{H}_{15}^{78,9183}\text{BrFNO}_3+\text{Na}^+]$  426.0112, found 426.0116; ESI-HRMS: calcd for  $[\text{C}_{19}\text{H}_{15}^{80,9163}\text{BrClNO}_3+\text{Na}^+]$  428.0092, found 428.0096.

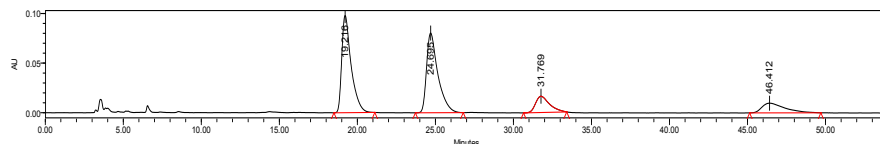

|   | Retention Time | % Area |
|---|----------------|--------|
| 1 | 19.216         | 40.36  |
| 2 | 24.695         | 39.88  |
| 3 | 31.769         | 9.99   |
| 4 | 46.412         | 9.78   |

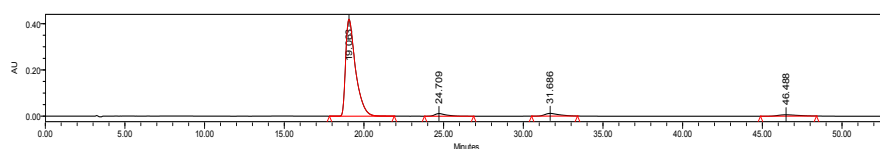

|   | Retention Time | % Area |
|---|----------------|--------|
| 1 | 19.063         | 91.09  |
| 2 | 24.709         | 2.87   |
| 3 | 31.686         | 3.61   |
| 4 | 46.488         | 2.43   |

**1-((1R,2R)-2-Bromo-3-(3-chlorophenyl)-3-oxo-1-phenylpropyl)pyrrolidine-2,5-dione **3u****

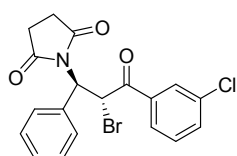

Yield: 33.4 mg (80%), white amorphous solid, 92:8 dr [determined by the ratio of area at  $\delta$  6.00 (d,  $J$  = 11.2 Hz, 0.08H) and  $\delta$  5.77 (d,  $J$  = 11.2 Hz, 0.92H) in  $^1\text{H}$  NMR], 97% ee;  $[\alpha]^{24.9}_{\text{D}} = 80.7$  ( $c$  = 0.27,  $\text{CH}_2\text{Cl}_2$ );

HPLC (Daicel chiralcel IE, *n*-hexane/*i*-PrOH 90/10, 1.0 mL/min, 254 nm)  $t_{\text{R}(\text{major})} = 15.21$  min,  $t_{\text{R}(\text{minor})} = 17.80$  min;  $^1\text{H}$  NMR (400 MHz,  $\text{CDCl}_3$ )  $\delta$  = 8.00 (s, 1H), 7.93 – 7.08 (m, 4H), 7.48 – 7.24 (m, 4H), 6.75 (d,  $J$  = 11.6 Hz, 0.08H), 6.55 (d,  $J$  = 10.8 Hz, 0.92H), 6.00 (d,  $J$  = 11.2 Hz, 0.08H), 5.77 (d,  $J$  = 11.2 Hz, 0.92H), 2.76 – 2.56 (m, 4H).  $^{13}\text{C}$  NMR (100 MHz,  $\text{CDCl}_3$ )  $\delta$  = 190.7, 176.7, 136.5, 135.4, 135.3, 133.9, 130.2, 129.1, 128.9, 127.0, 57.5, 44.7, 28.0. ESI-HRMS: calcd for  $[\text{C}_{19}\text{H}_{15}^{78,9183}\text{BrClNO}_3+\text{Na}^+]$  441.9817, found 441.9818; ESI-HRMS: calcd for  $[\text{C}_{19}\text{H}_{15}^{80,9163}\text{BrClNO}_3+\text{Na}^+]$  443.9796, found 443.9792.



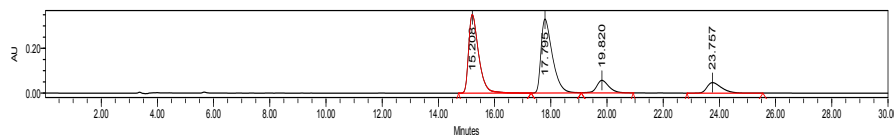

|   | Retention Time | % Area |
|---|----------------|--------|
| 1 | 15.208         | 40.69  |
| 2 | 17.795         | 43.42  |
| 3 | 19.820         | 7.97   |
| 4 | 23.757         | 7.92   |

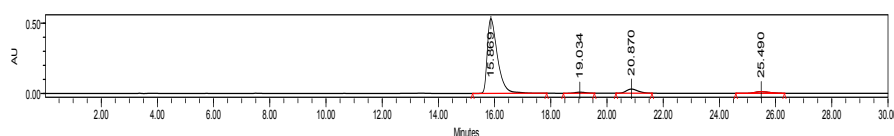

|   | Retention Time | % Area |
|---|----------------|--------|
| 1 | 15.869         | 90.22  |
| 2 | 19.034         | 1.22   |
| 3 | 20.870         | 5.77   |
| 4 | 25.490         | 2.79   |

**1-((1*R*,2*R*)-2-Bromo-3-(4-chlorophenyl)-3-oxo-1-phenylpropyl)pyrrolidine-2,5-dione 3v**

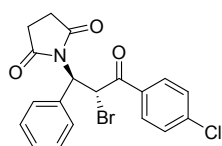

Yield: 34.7 mg (83%), white amorphous solid, 91/9 dr [determined by the ratio of area at  $\delta$  5.99 (d,  $J = 11.2$  Hz, 0.09H) and 5.78 (d,  $J = 11.2$  Hz, 0.91H) in  $^1\text{H NMR}$ ], 92% ee;  $[\alpha]^{24.9}_{\text{D}} = 51.1$  ( $c = 0.57$ ,  $\text{CH}_2\text{Cl}_2$ ); HPLC (Daicel chiralcel IE, *n*-hexane/*i*-PrOH 90/10, 1.0 mL/min, 254 nm)  $t_{\text{R(major)}}$  = 27.33 min,  $t_{\text{R(minor)}}$  = 31.25 min;  $^1\text{H NMR}$  (400 MHz,  $\text{CDCl}_3$ )  $\delta$  = 7.98 (d,  $J = 8.4$  Hz, 1.82H), 7.88 (d,  $J = 8.4$  Hz, 0.18H), 7.65 – 7.46 (m, 4H), 7.41 – 7.38 (m, 2.73H), 7.23 (d, 0.27H), 6.76 (d,  $J = 11.6$  Hz, 0.09H), 6.56 (d,  $J = 11.2$  Hz, 0.91H), 5.99 (d,  $J = 11.2$  Hz, 0.09H), 5.78 (d,  $J = 11.2$  Hz, 0.91H), 2.74 – 2.48 (m, 4H).  $^{13}\text{C NMR}$  (100 MHz,  $\text{CDCl}_3$ )  $\delta$  = 190.8, 176.7, 140.5, 136.6, 132.1, 130.3, 129.3, 129.0, 128.9, 57.5, 44.5, 28.0. ESI-HRMS: calcd for  $[\text{C}_{19}\text{H}_{15}^{78,9183}\text{BrClNO}_3 + \text{Na}^+]$  441.9817, found 441.9822; ESI-HRMS: calcd for  $[\text{C}_{19}\text{H}_{15}^{80,9163}\text{BrClNO}_3 + \text{Na}^+]$  443.9796, found 443.9801.

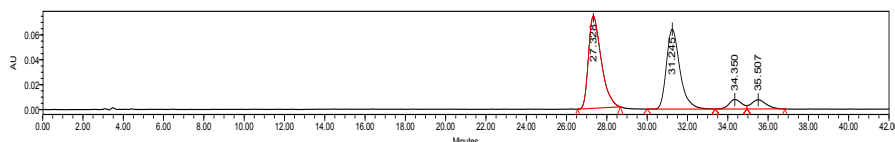

|   | Retention Time | % Area |
|---|----------------|--------|
| 1 | 27.328         | 46.87  |
| 2 | 31.245         | 42.87  |
| 3 | 34.350         | 4.84   |
| 4 | 35.507         | 5.42   |

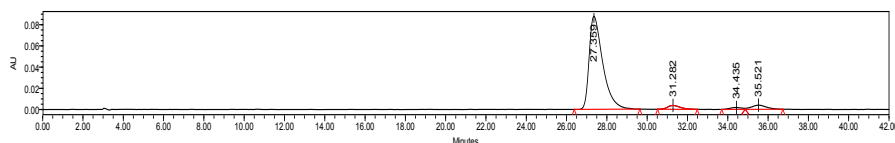

|   | Retention Time | % Area |
|---|----------------|--------|
| 1 | 27.359         | 90.42  |
| 2 | 31.282         | 3.49   |
| 3 | 34.435         | 1.62   |
| 4 | 35.521         | 4.46   |

### 1-((1*R*,2*R*)-2-Bromo-3-(4-bromophenyl)-3-oxo-1-phenylpropyl)pyrrolidine-2,5-dione **3w**

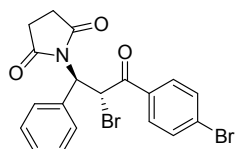

Yield: 36.5 mg (79%), white amorphous solid, 91/9 dr [determined by the ratio of area at  $\delta$  5.99 (d,  $J = 11.6$  Hz, 0.09H) and 5.77 (d,  $J = 11.2$  Hz, 0.91H) in  $^1\text{H NMR}$ ], 90% ee;  $[\alpha]^{24.6}_{\text{D}} = 57.3$  ( $c = 0.45$ ,  $\text{CH}_2\text{Cl}_2$ ); HPLC (Daicel chiralcel ID, *n*-hexane/*i*-PrOH 90/10, 1.0 mL/min, 254 nm)  $t_{\text{R}(\text{major})} = 26.52$  min,  $t_{\text{R}(\text{minor})} = 24.65$  min;  $^1\text{H NMR}$  (400 MHz,  $\text{CDCl}_3$ )  $\delta = 7.90$  (d,  $J = 8.8$  Hz, 1.82H), 7.79 (d,  $J = 8.4$  Hz, 0.18H), 7.65 – 7.52 (m, 4H), 7.41 – 7.38 (m, 2.73H), 7.23 (d, 0.23H), 6.76 (d,  $J = 11.6$  Hz, 0.09H), 6.56 (d,  $J = 11.2$  Hz, 0.91H), 5.99 (d,  $J = 11.6$  Hz, 0.09H), 5.77 (d,  $J = 11.2$  Hz, 0.91H), 2.74 – 2.47 (m, 4H).  $^{13}\text{C NMR}$  (100 MHz,  $\text{CDCl}_3$ )  $\delta = 191.0, 176.8, 136.6, 132.5, 132.3, 130.4, 129.4, 129.1, 129.0, 128.9, 57.5, 44.6, 28.0$ . ESI-HRMS: calcd for  $[\text{C}_{19}\text{H}_{15}^{78.9183}\text{Br}_2\text{NO}_3 + \text{Na}^+]$  485.9311, found 485.9313; ESI-HRMS: calcd for  $[\text{C}_{19}\text{H}_{15}^{78.9183}\text{Br}^{80.9163}\text{BrNO}_3 + \text{Na}^+]$  487.9291, found 487.9291; ESI-HRMS: calcd for  $[\text{C}_{19}\text{H}_{15}^{80.9163}\text{Br}_2\text{NO}_3 + \text{Na}^+]$  489.9270, found 489.9275.

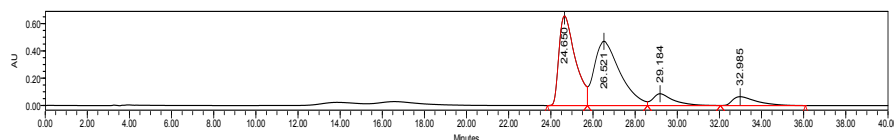

|   | Retention Time | % Area |
|---|----------------|--------|
| 1 | 24.650         | 40.76  |
| 2 | 26.521         | 46.43  |
| 3 | 29.184         | 6.86   |
| 4 | 32.985         | 5.96   |

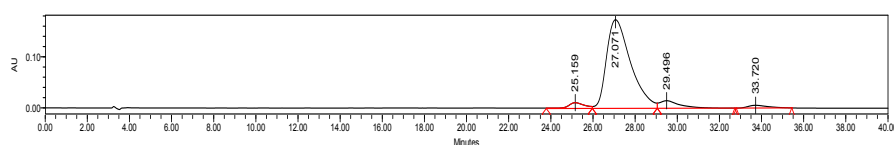

|   | Retention Time | % Area |
|---|----------------|--------|
| 1 | 25.159         | 3.63   |
| 2 | 27.071         | 88.23  |
| 3 | 29.496         | 5.89   |
| 4 | 33.720         | 2.25   |

**4-((2R,3R)-2-Bromo-3-(2,5-dioxopyrrolidin-1-yl)-3-phenylpropanoyl)benzotrile 3x**

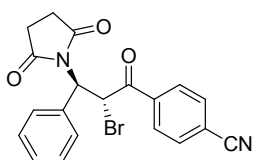

Yield: 29.5 mg (72%), white amorphous solid, 92:8 dr [determined by the ratio of area at  $\delta$  5.98 (d,  $J$  = 11.2 Hz, 0.08H) and  $\delta$  5.76 (d,  $J$  = 11.2 Hz, 0.92H) in  $^1\text{H}$  NMR], 94% ee;  $[\alpha]^{24.9}_{\text{D}}$  = 103.7 ( $c$  = 0.38,  $\text{CH}_2\text{Cl}_2$ );

HPLC (Daicel chiralcel ID, *n*-hexane /*i*-PrOH 85/15, 1.0 mL/min, 254 nm)  $t_{\text{R(major)}}$  = 34.06 min,  $t_{\text{R(minor)}}$  = 39.00 min;  $^1\text{H}$  NMR (400 MHz,  $\text{CDCl}_3$ )  $\delta$  = 8.13 (d,  $J$  = 8.4 Hz, 1.84H), 8.02 (d,  $J$  = 8.4 Hz, 0.16H), 7.81 (d,  $J$  = 8.4 Hz, 1.84H), 7.75 (d,  $J$  = 8.4 Hz, 0.16H), 7.63 – 7.61 (m, 2H), 7.42 – 7.38 (m, 2.76H), 7.25 – 7.24 (m, 0.24H), 6.78 (d,  $J$  = 11.6 Hz, 0.08H), 6.57 (d,  $J$  = 10.8 Hz, 0.92H), 5.98 (d,  $J$  = 11.2 Hz, 0.08H), 5.76 (d,  $J$  = 11.2 Hz, 0.92H), 2.76 – 2.53 (m, 4H),  $^{13}\text{C}$  NMR (100 MHz,  $\text{CDCl}_3$ )  $\delta$  = 190.7, 176.9, 137.1, 136.4, 132.7, 129.3, 129.2, 129.0, 128.8, 117.8, 111.7, 57.6, 45.0, 28.0. ESI-HRMS: calcd for  $[\text{C}_{20}\text{H}_{15}^{78.9183}\text{BrN}_2\text{O}_3+\text{Na}^+]$  433.0159, found 433.0162; ESI-HRMS: calcd for  $[\text{C}_{20}\text{H}_{15}^{80.9163}\text{BrN}_2\text{O}_3+\text{Na}^+]$  435.0138, found 435.0138.

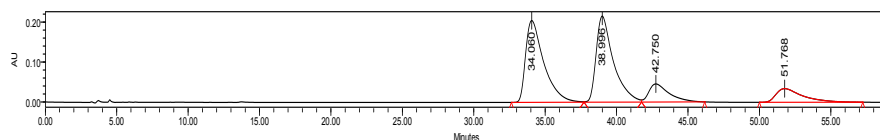

|   | Retention Time | % Area |
|---|----------------|--------|
| 1 | 34.060         | 40.19  |
| 2 | 38.996         | 40.13  |
| 3 | 42.750         | 9.84   |
| 4 | 51.768         | 9.83   |

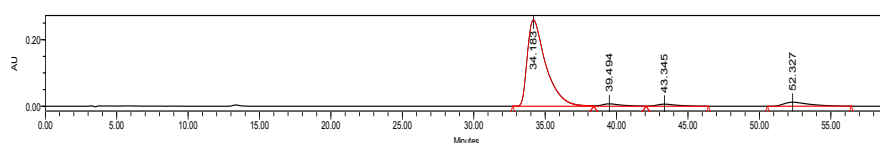

|   | Retention Time | % Area |
|---|----------------|--------|
| 1 | 34.183         | 89.26  |
| 2 | 39.494         | 2.61   |
| 3 | 43.345         | 2.32   |
| 4 | 52.327         | 5.81   |

### 1-((1*R*,2*R*)-2-Bromo-3-(4-nitrophenyl)-3-oxo-1-phenylpropyl)pyrrolidine-2,5-dione **3y**

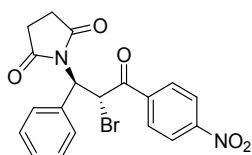

Yield: 32.2mg (75%), white amorphous solid, 91/9 dr [determined by ratio of area at  $\delta$  5.99 (d,  $J = 11.6$  Hz, 0.09H) and  $\delta$  5.76 (d,  $J = 11.2$  Hz, 0.91H) in  $^1\text{H NMR}$ ], 92% ee;  $[\alpha]^{28.0}_{\text{D}} = 63.2$  ( $c = 0.74$ ,  $\text{CH}_2\text{Cl}_2$ ); HPLC (Daicel chiralcel IE, *n*-hexane/*i*-PrOH 80/20, 1.0 mL/min, 254 nm)  $t_{\text{R(major)}} = 35.49$  min,  $t_{\text{R(minor)}} = 48.56$  min;  $^1\text{H NMR}$  (400 MHz,  $\text{CDCl}_3$ )  $\delta = 8.37 - 8.28$  (m, 2H), 8.22 - 8.08 (m, 2H), 7.64 - 7.54 (m, 2H), 7.44 - 7.37 (m, 2.79H), 7.25 (d, 0.21H), 6.81 (d,  $J = 11.6$  Hz 0.09H), 6.59 (d,  $J = 11.2$  Hz, 0.91H), 5.99 (d,  $J = 11.6$  Hz, 0.09H), 5.76 (d,  $J = 11.2$  Hz, 0.91H), 2.78 - 2.55 (m, 4H),  $^{13}\text{C NMR}$  (100 MHz,  $\text{CDCl}_3$ )  $\delta = 191.3, 176.6, 148.2, 143.4, 133.5, 130.0, 129.0, 124.1, 56.6, 43.3, 28.0$ . ESI-HRMS calcd for  $[\text{C}_{19}\text{H}_{15}^{78.9183}\text{BrN}_2\text{O}_5 + \text{Na}^+]$  453.0057, found 453.0067; ESI-HRMS: calcd for  $[\text{C}_{19}\text{H}_{15}^{80.9163}\text{BrN}_2\text{O}_5 + \text{Na}^+]$  455.0037, found 455.0045.

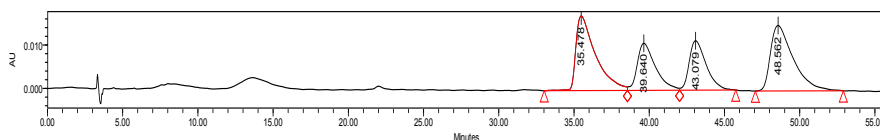

|   | Retention Time | % Area |
|---|----------------|--------|
| 1 | 35.478         | 31.57  |
| 2 | 39.640         | 18.41  |
| 3 | 43.079         | 18.00  |
| 4 | 48.562         | 32.02  |

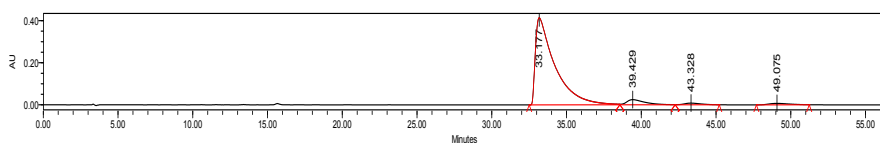

|   | Retention Time | % Area |
|---|----------------|--------|
| 1 | 33.177         | 91.89  |
| 2 | 39.429         | 5.11   |
| 3 | 43.328         | 1.45   |
| 4 | 49.075         | 1.55   |

### 1-((1*R*,2*R*)-2-Bromo-3-(3,4-dichlorophenyl)-3-oxo-1-phenylpropyl)pyrrolidine-2,5-dione **3z**

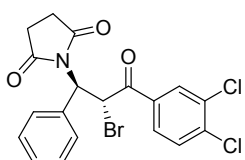

Yield: 34.5 mg (76%), white amorphous solid, 93:7 dr [determined by the ratio of area at  $\delta$  5.98 (d,  $J$  = 11.2 Hz, 0.07H)) and  $\delta$  5.75 (d,  $J$  = 11.2 Hz, 0.93H) in  $^1\text{H}$  NMR], 92% ee;  $[\alpha]^{24.6}_{\text{D}} = 74.0$  ( $c$  = 0.48,  $\text{CH}_2\text{Cl}_2$ ); HPLC (Daicel chiralcel IE, *n*-hexane/*i*-PrOH 90/10, 1.0 mL/min, 254 nm)  $t_{\text{R(major)}}$  = 13.51 min,  $t_{\text{R(minor)}}$  = 15.08 min;  $^1\text{H}$  NMR (400 MHz,  $\text{CDCl}_3$ )  $\delta$  = 8.11 (d,  $J$  = 2.0 Hz, 0.93H), 8.00 (d,  $J$  = 2.4 Hz, 0.07H), 7.88 – 7.75 (m, 1H), 7.64 – 7.37 (m, 5.79H), 7.25 – 7.24 (t, 0.21H), 6.72 (d,  $J$  = 11.6 Hz, 0.07H), 6.50 (d,  $J$  = 11.2 Hz, 0.93H), 5.98 (d,  $J$  = 11.2 Hz, 0.07H), 5.75 (d,  $J$  = 11.2 Hz, 0.93H) 2.76 – 2.52 (m, 4H).  $^{13}\text{C}$  NMR (100 MHz,  $\text{CDCl}_3$ )  $\delta$  = 189.8, 176.8, 138.7, 136.5, 133.7, 133.3, 131.0, 130.8, 129.1, 129.0, 128.9, 127.9, 57.5, 44.7, 28.0. ESI-HRMS: calcd for  $[\text{C}_{19}\text{H}_{14}^{78.9183}\text{BrCl}_2\text{NO}_3+\text{Na}^+]$  475.9427, found 475.9424; ESI-HRMS: calcd for  $[\text{C}_{19}\text{H}_{14}^{80.9163}\text{BrCl}_2\text{NO}_3+\text{Na}^+]$  477.9406, found 477.9389.

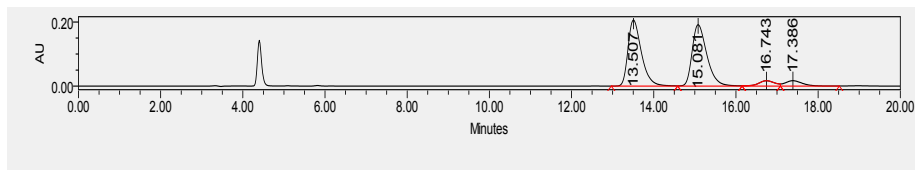

|   | Retention Time | % Area |
|---|----------------|--------|
| 1 | 13.507         | 45.02  |
| 2 | 15.081         | 45.87  |
| 3 | 16.743         | 4.38   |
| 4 | 17.386         | 4.72   |

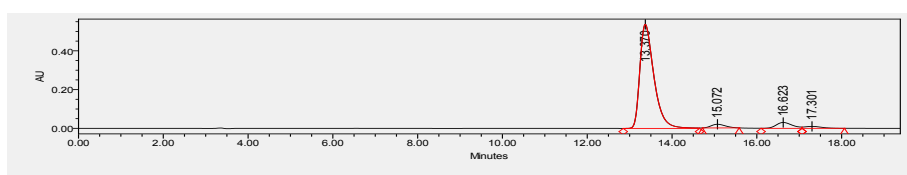

|   | Retention Time | % Area |
|---|----------------|--------|
| 1 | 13.370         | 89.07  |
| 2 | 15.072         | 3.16   |
| 3 | 16.623         | 5.78   |
| 4 | 17.301         | 1.98   |

### 1-((1*R*,2*R*)-2-Bromo-3-(naphthalen-2-yl)-3-oxo-1-phenylpropyl)pyrrolidine-2,5-dione **3aa**

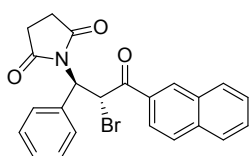

Yield: 35.7 mg (82%), white amorphous solid, 91:9 dr [determined by the ratio of area at  $\delta$  6.10 (d,  $J$  = 11.6 Hz, 0.09H) and  $\delta$  5.88 (d,  $J$  = 11.2 Hz, 0.91H) in  $^1\text{H NMR}$ ], 91% ee;  $[\alpha]^{24.9}_{\text{D}} = 9.6$  ( $c = 0.36$ ,  $\text{CH}_2\text{Cl}_2$ ); HPLC (Daicel chiralcel IE, *n*-hexane/*i*-PrOH 90/10, 1.0 mL/min, 254 nm)  $t_{\text{R(major)}}$  = 48.05 min,  $t_{\text{R(minor)}}$  = 45.02 min;  $^1\text{H NMR}$  (400 MHz,  $\text{CDCl}_3$ )  $\delta$  = 8.60 (s, 1H), 8.06 – 7.70 (m, 6H), 7.62 – 7.50 (m, 2H), 7.43 – 7.36 (m, 2.73H), 7.24 – 7.19 (m, 0.26H), 7.00 (d,  $J$  = 11.6 Hz, 0.09H), 6.81 (d,  $J$  = 11.2 Hz, 0.91H), 6.10 (d,  $J$  = 11.6 Hz, 0.09H), 5.88 (d,  $J$  = 11.2 Hz, 0.91H), 2.73 – 2.47 (m, 4H).  $^{13}\text{C NMR}$  (100 MHz,  $\text{CDCl}_3$ )  $\delta$  = 192.0, 176.8, 136.8, 136.0, 132.5, 131.1, 130.9, 129.9, 129.0, 128.9, 127.8, 127.0, 124.2, 57.5, 44.6, 28.0. ESI-HRMS: calcd for  $[\text{C}_{23}\text{H}_{18}^{78,9183}\text{BrNO}_3 + \text{Na}^+]$  458.0363, found 458.0371; ESI-HRMS: calcd for  $[\text{C}_{23}\text{H}_{18}^{80,9163}\text{BrNO}_3 + \text{Na}^+]$  460.0342, found 460.0343.

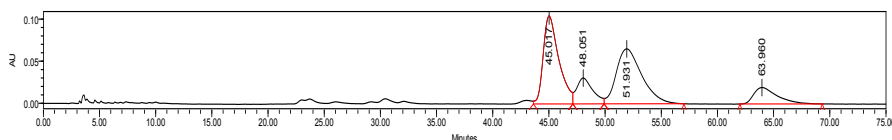

|   | Retention Time | % Area |
|---|----------------|--------|
| 1 | 45.017         | 38.28  |
| 2 | 48.051         | 11.69  |
| 3 | 51.931         | 39.16  |
| 4 | 63.960         | 10.87  |

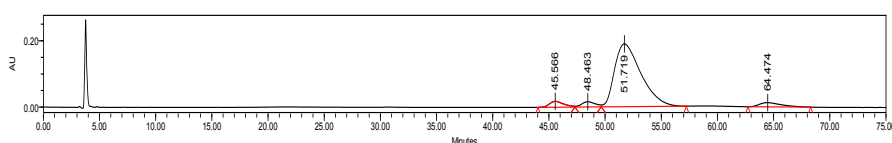

|   | Retention Time | % Area |
|---|----------------|--------|
| 1 | 45.566         | 4.46   |
| 2 | 48.463         | 3.82   |
| 3 | 51.719         | 86.87  |
| 4 | 64.474         | 4.85   |

**1-((1R,2R,E)-2-Bromo-3-oxo-1,5-diphenylpent-4-en-1-yl)pyrrolidine-2,5-dione **3ab****

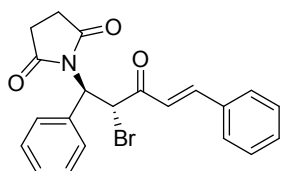

Yield: 34.5 mg (84%), white amorphous solid, 85/15 dr [determined by ratio of area at  $\delta$  5.87 (d,  $J$  = 12.0 Hz, 0.15H) and  $\delta$  5.72 (d,  $J$  = 11.2 Hz, 0.85H) in  $^1\text{H}$  NMR], 86% ee;  $[\alpha]^{24.6}_{\text{D}} = 56.4$  ( $c = 0.57$ ,  $\text{CH}_2\text{Cl}_2$ ); HPLC (Daicel chiralcel ID,  $n$ -hexane/ $i$ -PrOH 85/15, 1.0 mL/min, 254 nm)  $t_{\text{R(major)}}$  = 23.10 min,  $t_{\text{R(minor)}}$  = 27.86 min;  $^1\text{H}$  NMR (400 MHz,  $\text{CDCl}_3$ )  $\delta$  7.75 (d, 1H), 7.61 – 7.36 (m, 10H), 6.92 (d,  $J$  = 16.0 Hz, 0.85H), 6.82 (d,  $J$  = 16.0 Hz, 0.15H), 6.21 (d,  $J$  = 11.6 Hz, 0.15H), 6.01 (d,  $J$  = 11.6 Hz, 0.85H), 5.87 (d,  $J$  = 12.0 Hz, 0.15H), 5.72 (d,  $J$  = 11.2 Hz, 0.85H), 2.74 – 2.55 (m, 4H).  $^{13}\text{C}$  NMR (100 MHz,  $\text{CDCl}_3$ )  $\delta$  = 191.0, 176.6, 145.5, 131.2, 128.9, 128.8, 122.4, 57.2, 48.4, 28.0. ESI-HRMS: calcd for  $[\text{C}_{21}\text{H}_{18}^{78,9183}\text{BrNO}_3 + \text{Na}^+]$  434.0363, found 434.0371; ESI-HRMS: calcd for  $[\text{C}_{21}\text{H}_{18}^{80,9163}\text{BrNO}_3 + \text{Na}^+]$  436.0342, found 436.0354.

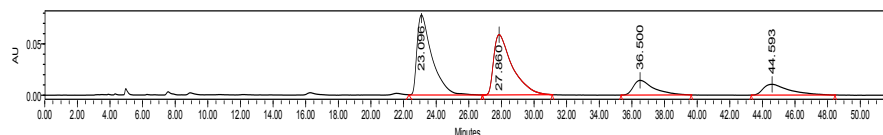

|   | Retention Time | % Area |
|---|----------------|--------|
| 1 | 23.096         | 41.42  |
| 2 | 27.860         | 38.53  |
| 3 | 36.500         | 10.38  |
| 4 | 44.593         | 9.67   |

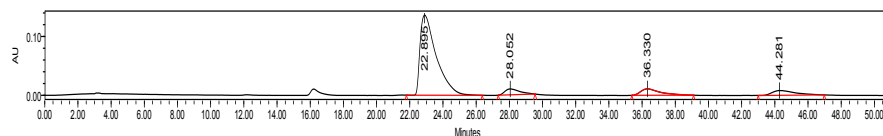

|   | Retention Time | % Area |
|---|----------------|--------|
| 1 | 22.895         | 80.02  |
| 2 | 28.052         | 5.40   |
| 3 | 36.330         | 7.89   |
| 4 | 44.281         | 6.68   |

### 1-((1*R*,2*R*)-2-Iodo-3-oxo-1,3-diphenylpropyl)pyrrolidine-2,5-dione

4a

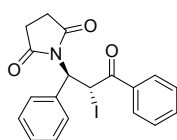

Yield: 32.5 mg (75%), white amorphous solid, 96/4 dr [determined by ratio of area at  $\delta$  6.01 (d,  $J = 11.6$  Hz, 0.04H) and  $\delta$  5.88 (d,  $J = 11.6$  Hz, 0.96H) in  $^1\text{H}$  NMR], 73% ee; HPLC (Daicel chiralcel IE, *n*-hexane/ *i*-PrOH 90/10, 1.0 mL/min, 254 nm)  $t_{\text{R(major)}}$  = 24.78 min,  $t_{\text{R(minor)}}$  = 31.33 min;  $^1\text{H}$  NMR (400 MHz,  $\text{CDCl}_3$ )  $\delta$  8.03 – 7.92 (m, 2H), 7.68 – 7.37 (m, 8H), 7.10 (d,  $J = 11.6$  Hz, 0.04H), 6.85 (d,  $J = 11.6$  Hz, 0.96H), 6.01 (d,  $J = 11.6$  Hz, 0.04H), 5.88 (d,  $J = 11.6$  Hz, 0.96H), 2.76 – 2.49 (m, 4H).  $^{13}\text{C}$  NMR (100 MHz,  $\text{CDCl}_3$ )  $\delta$  = 193.6, 176.6, 137.5, 133.8, 133.6, 129.1, 129.0, 128.9, 128.7, 58.7, 27.9, 25.1. ESI-HRMS: calcd for  $[\text{C}_{19}\text{H}_{16}\text{INO}_3 + \text{Na}^+]$  456.0068, found 456.0081.

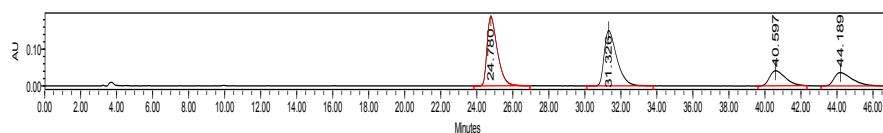

| Retention Time | % Area |
|----------------|--------|
|                |        |



|   |        |       |
|---|--------|-------|
| 1 | 24.780 | 37.81 |
| 2 | 31.326 | 36.90 |
| 3 | 40.597 | 12.63 |
| 4 | 44.189 | 12.67 |

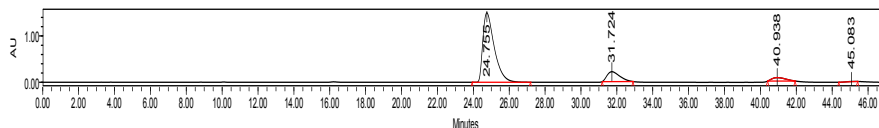

|   | Retention Time | % Area |
|---|----------------|--------|
| 1 | 24.755         | 82.07  |
| 2 | 31.724         | 12.87  |
| 3 | 40.938         | 4.83   |
| 4 | 45.083         | 0.23   |

### 1-((1*R*,2*R*)-2-Chloro-3-oxo-1,3-diphenylpropyl)pyrrolidine-2,5-dione

5a

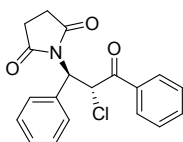

Yield: 23.2 mg (68%), white amorphous solid, 85/15 dr [determined by ratio of area at  $\delta$  5.96 (d,  $J = 11.2$  Hz, 0.15H) and  $\delta$  5.71 (d,  $J = 10.8$  Hz, 0.85H) in  $^1\text{H NMR}$ ], 69% ee;  $[\alpha]^{28.0}_{\text{D}} = 55.1$  ( $c = 0.65$ ,  $\text{CH}_2\text{Cl}_2$ ); HPLC (Daicel chiralcel IE, *n*-hexane/ *i*-PrOH 90/10, 1.0 mL/min, 254 nm)  $t_{\text{R}}(\text{major}) = 17.38$  min,  $t_{\text{R}}(\text{minor}) = 22.47$  min;  $^1\text{H NMR}$  (400 MHz,  $\text{CDCl}_3$ )  $\delta$  8.06 – 8.04 (m, 2H), 7.67 – 7.45 (m, 5H), 7.40 – 7.37 (m, 2.70H), 7.23 – 7.21 (m, 0.30H), 6.72 (d,  $J = 11.6$  Hz, 0.15H), 6.60 (d,  $J = 11.2$  Hz, 0.85H), 5.96 (d,  $J = 11.2$  Hz, 0.15H), 5.71 (d,  $J = 10.8$  Hz, 0.85H), 2.75 – 2.50 (m, 4H).  $^{13}\text{C NMR}$  (100 MHz,  $\text{CDCl}_3$ )  $\delta = 191.9, 176.8, 136.3, 134.1, 133.8, 129.1, 129.0, 128.8, 122.4, 57.3, 53.7, 28.0$ . ESI-HRMS: calcd for  $[\text{C}_{19}\text{H}_{16}\text{ClNO}_3 + \text{Na}^+]$  364.0711, found 364.0712.

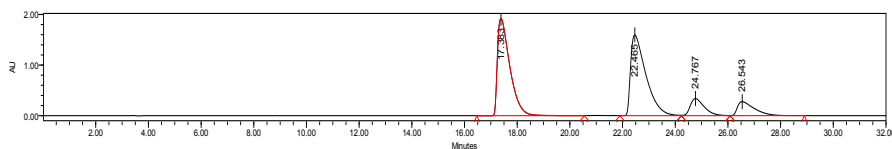

|   | Retention Time | % Area |
|---|----------------|--------|
| 1 | 17.383         | 41.24  |
| 2 | 22.465         | 42.40  |
| 3 | 24.767         | 8.23   |
| 4 | 26.543         | 8.13   |

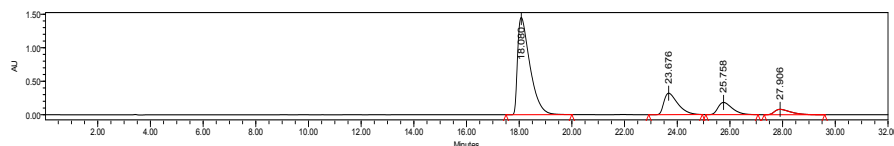

|   | Retention Time | % Area |
|---|----------------|--------|
| 1 | 18.080         | 68.28  |
| 2 | 23.676         | 16.96  |
| 3 | 25.758         | 9.91   |
| 4 | 27.906         | 4.85   |

### 1-(3-oxo-1,3-Diphenylpropyl)pyrrolidine-2,5-dione

7

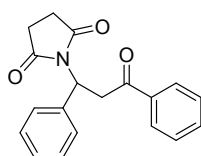

(1) without base, yield: trace; (2) base Et<sub>3</sub>N, yield: 6.45 mg (21%), ee: 75%;

(3) base DIPA, yield: 4.6 mg (15%), ee: 33%, white amorphous solid, <sup>1</sup>H

NMR (400 MHz, CDCl<sub>3</sub>) δ 7.96 (d, 2H), 7.67 – 7.56 (d, 3H), 7.45 (t, 2H),

7.36 – 7.29 (m, 3H), 5.90 – 5.86 (d, 1H), 4.62 – 4.55 (d, 1H), 3.70 – 3.64 (d, 1H), 2.62 (s, 4H).

<sup>13</sup>C NMR (100 MHz, CDCl<sub>3</sub>) δ = 197.0, 177.4, 138.8, 136.4, 133.5, 128.8, 128.7, 128.3, 128.1,

128.0, 51.2, 39.2, 28.0. ESI-HRMS: calcd for [C<sub>19</sub>H<sub>16</sub>ClNO<sub>3</sub>+Na<sup>+</sup>] 330.1101, found 330.1108.

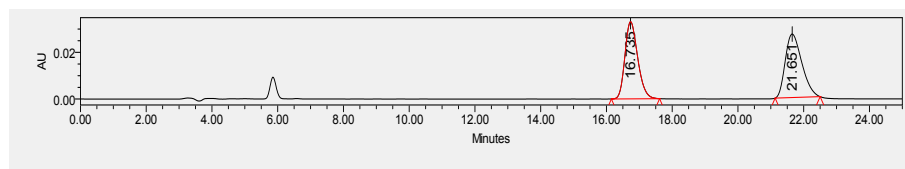

|   | Retention Time | % Area |
|---|----------------|--------|
| 1 | 16.735         | 48.40  |
| 2 | 21.651         | 51.60  |

(2) base: TEA

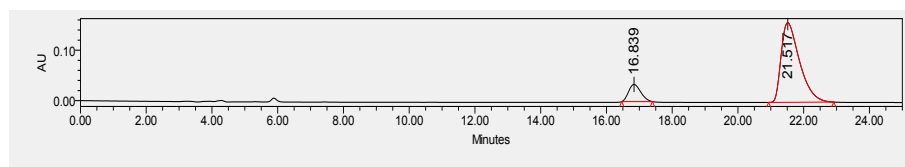

|   | Retention Time | % Area |
|---|----------------|--------|
| 1 | 16.839         | 12.39  |

|   |        |       |
|---|--------|-------|
| 2 | 21.517 | 87.61 |
|---|--------|-------|

(3) base: DIPA

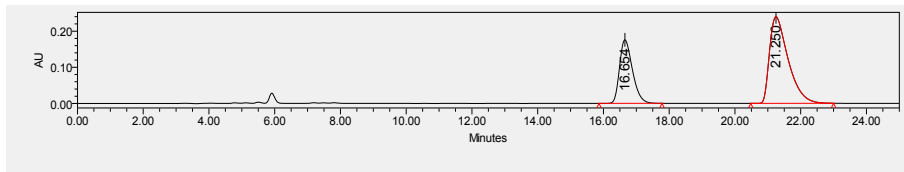

|   | Retention Time | % Area |
|---|----------------|--------|
| 1 | 16.654         | 33.78  |
| 2 | 21.250         | 66.22  |

## 7. Copies of $^1\text{H}$ NMR and $^{13}\text{C}$ NMR Spectra for Product

3a

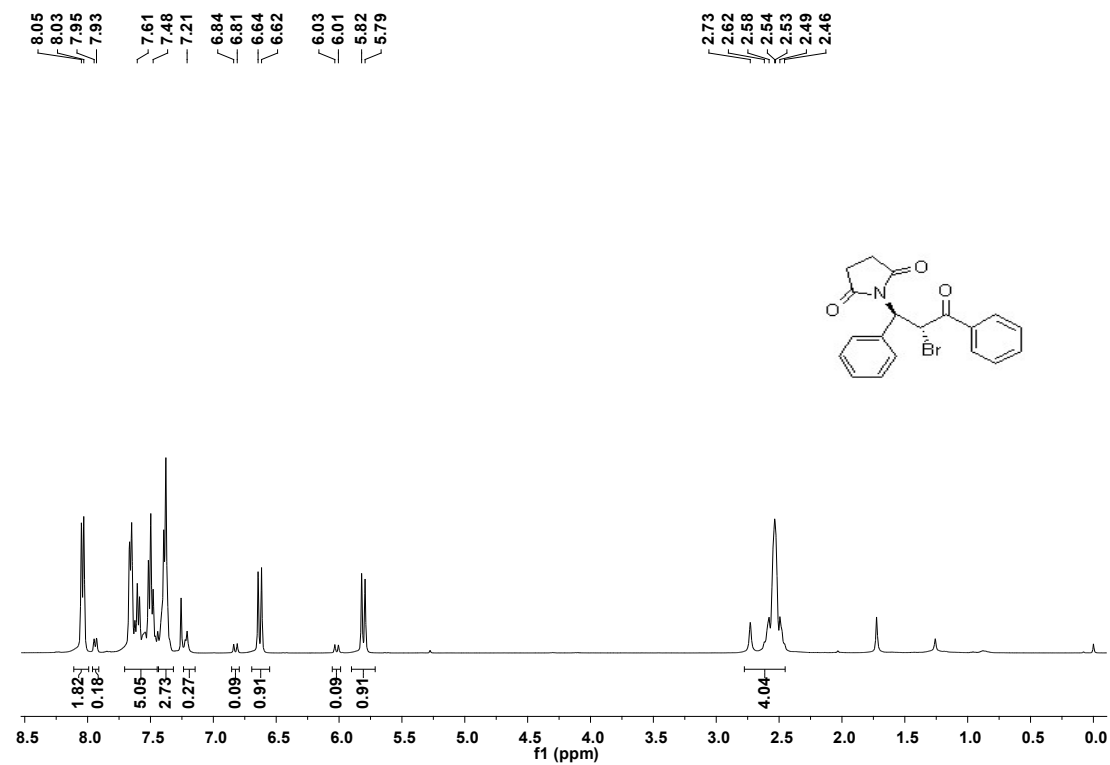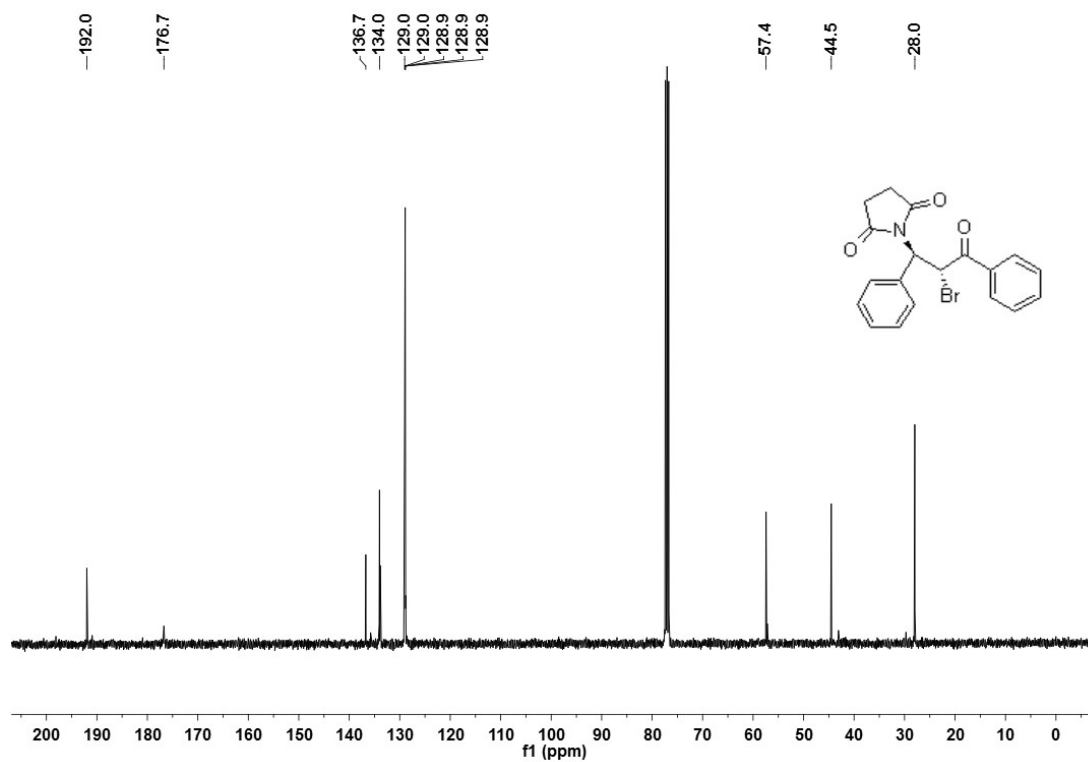

3b

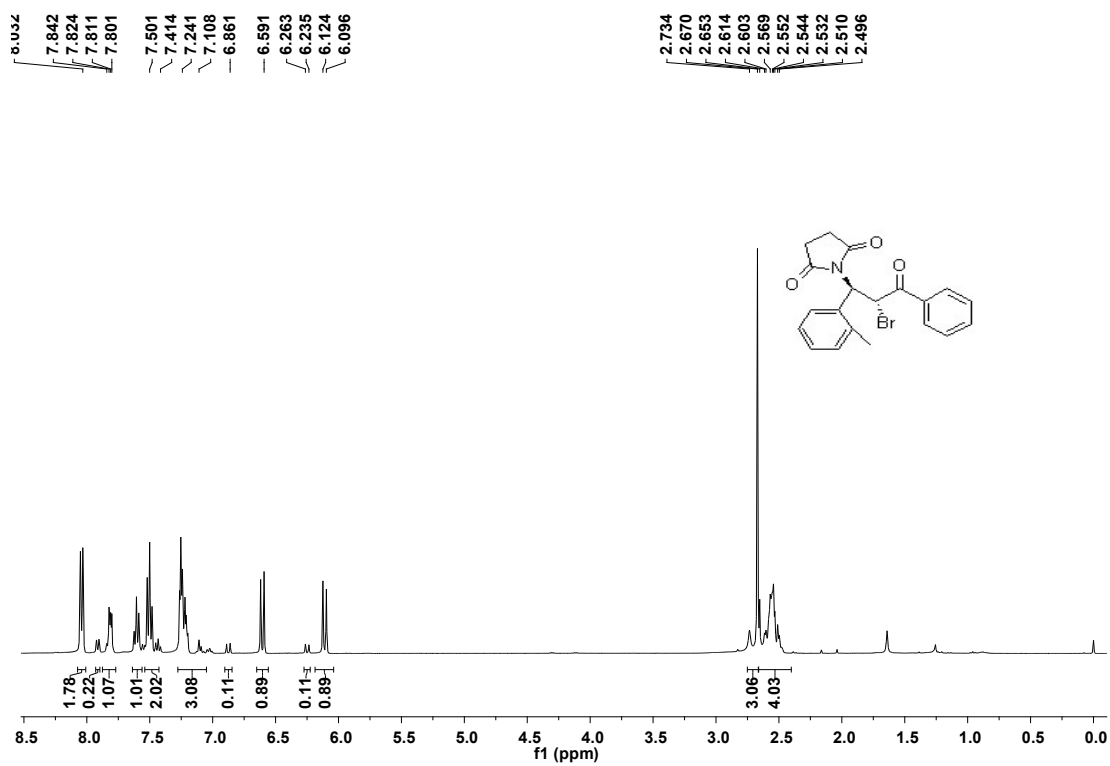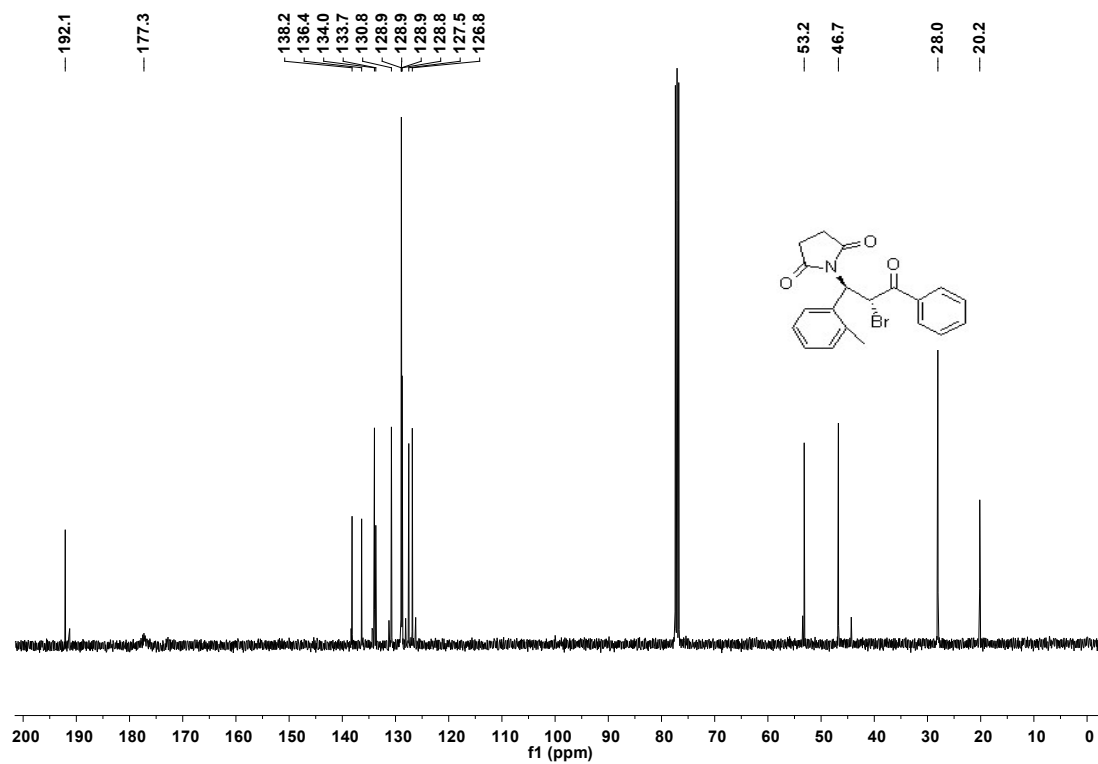

3c

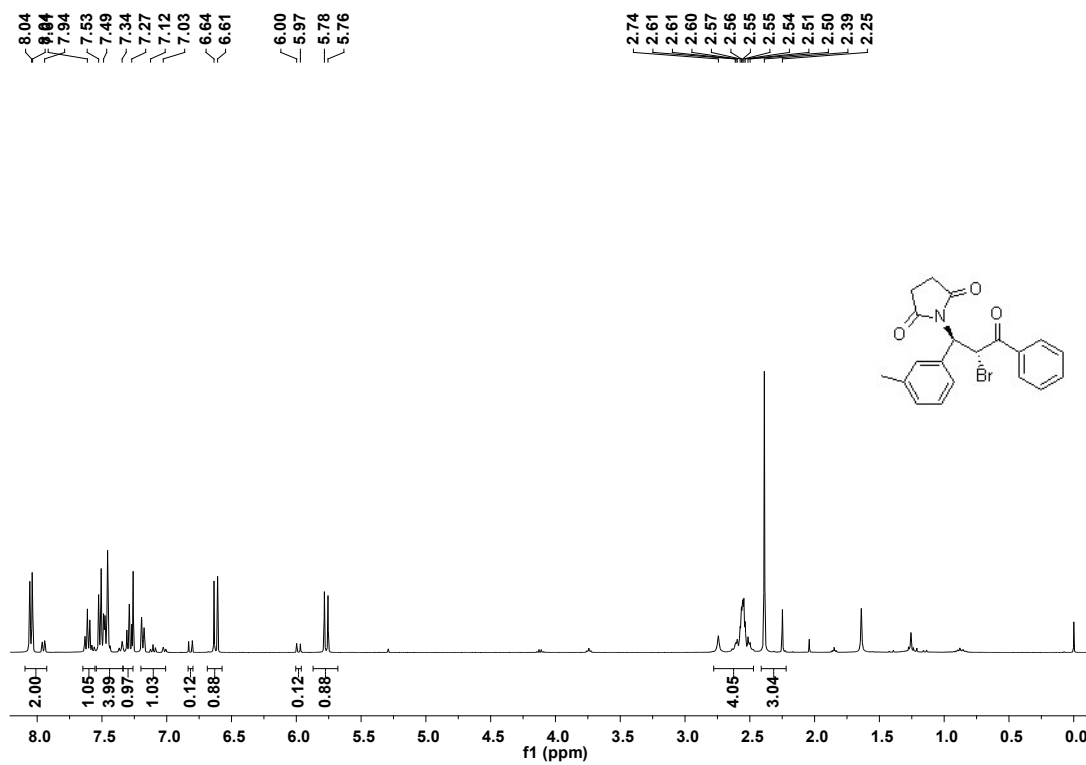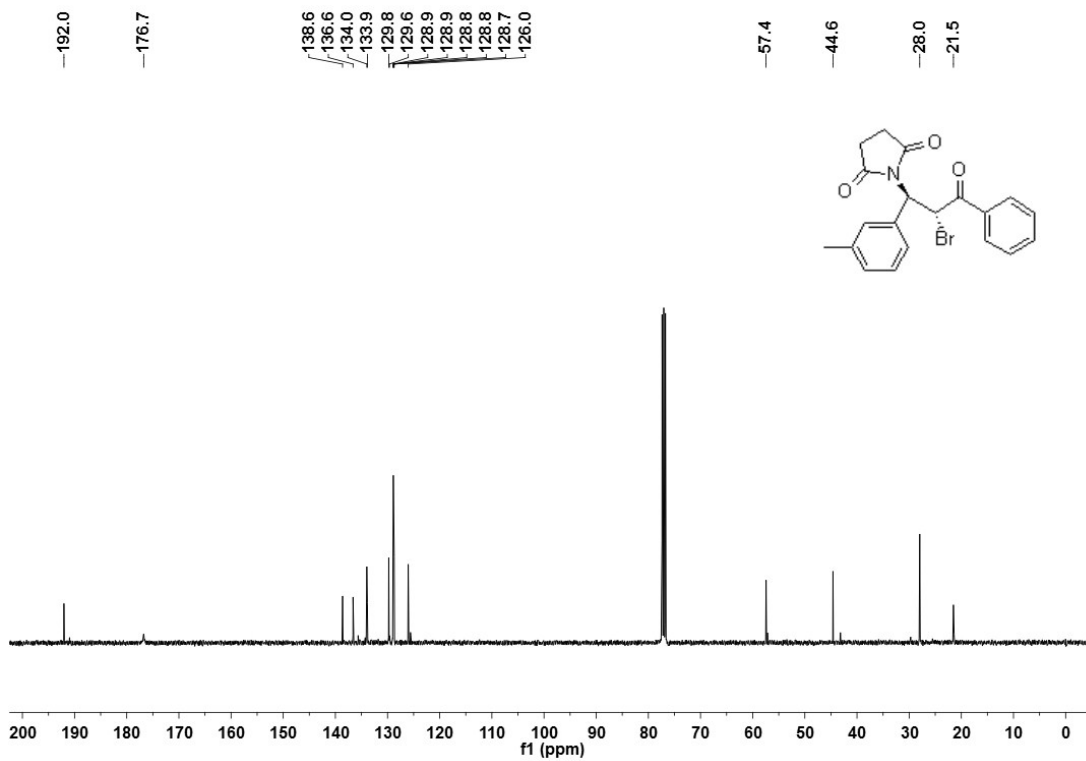

3d

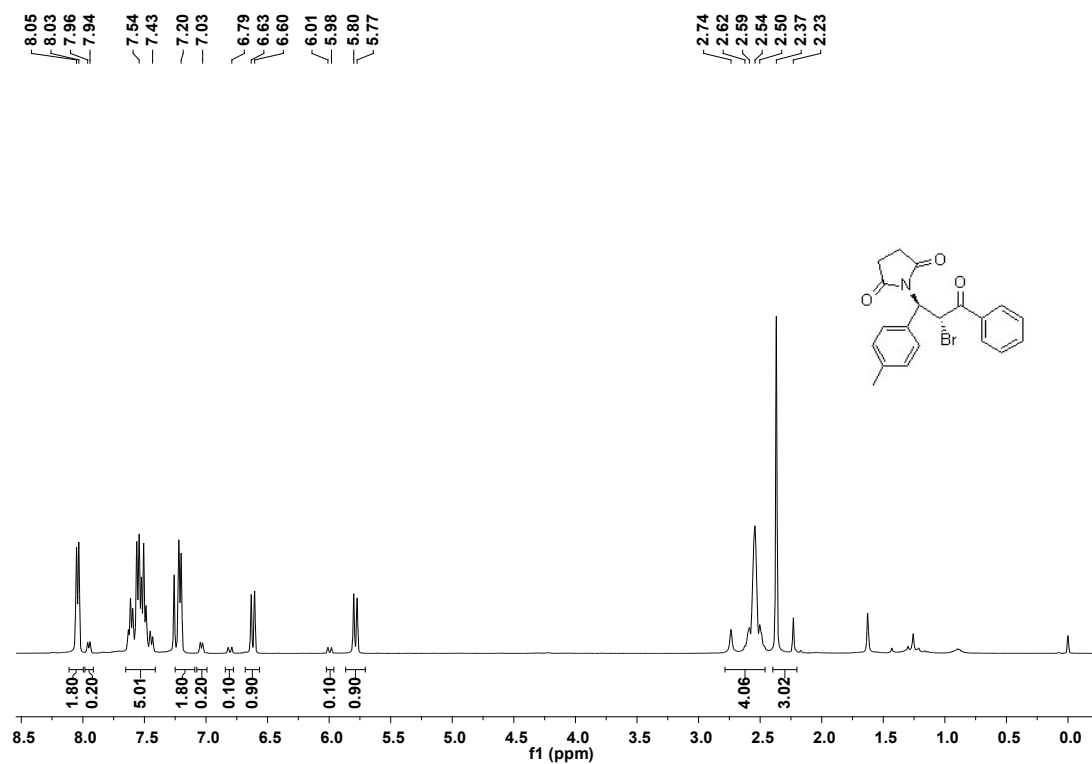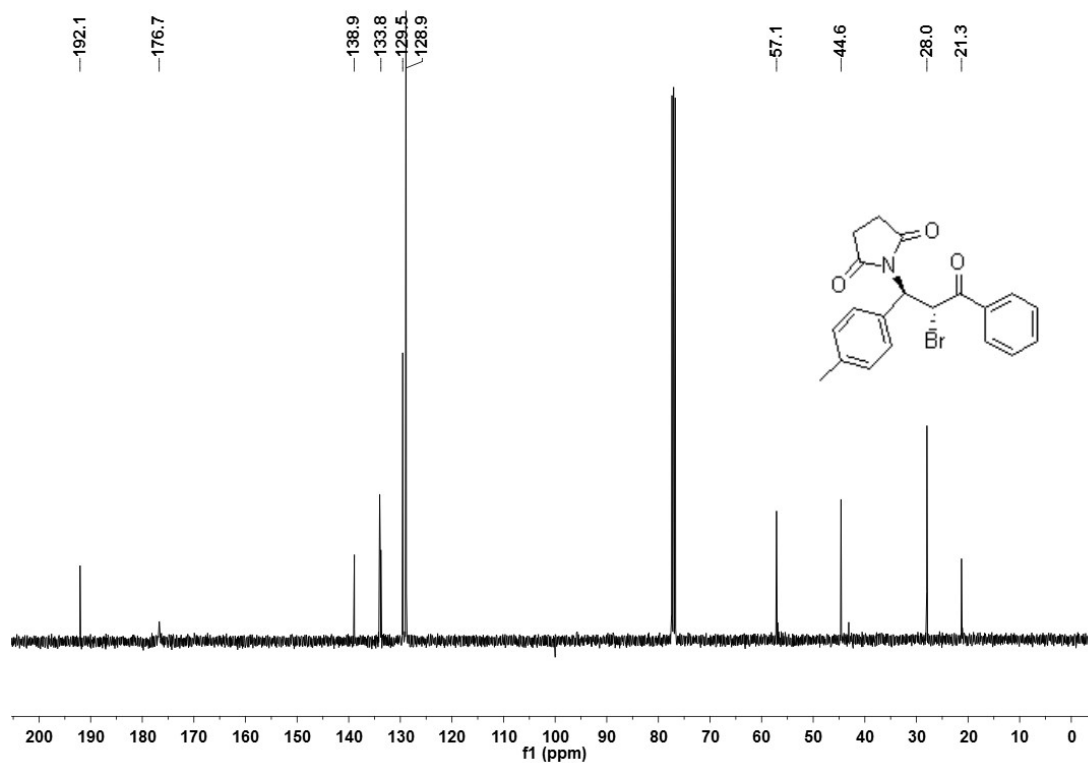

3e

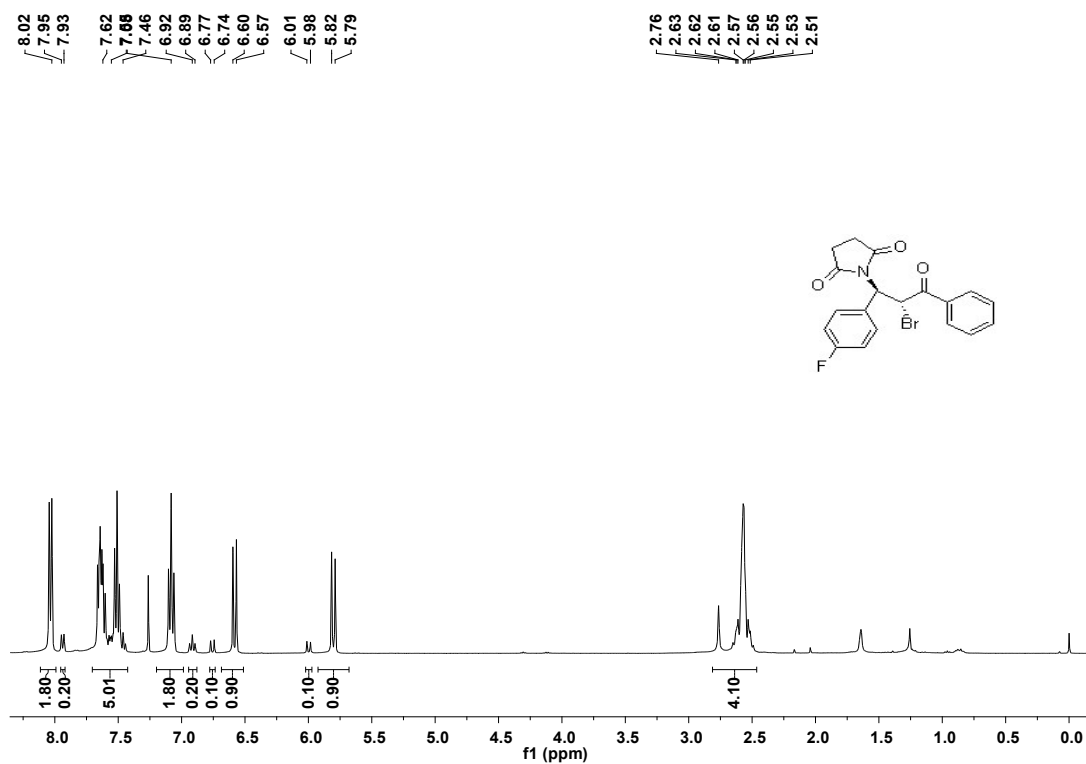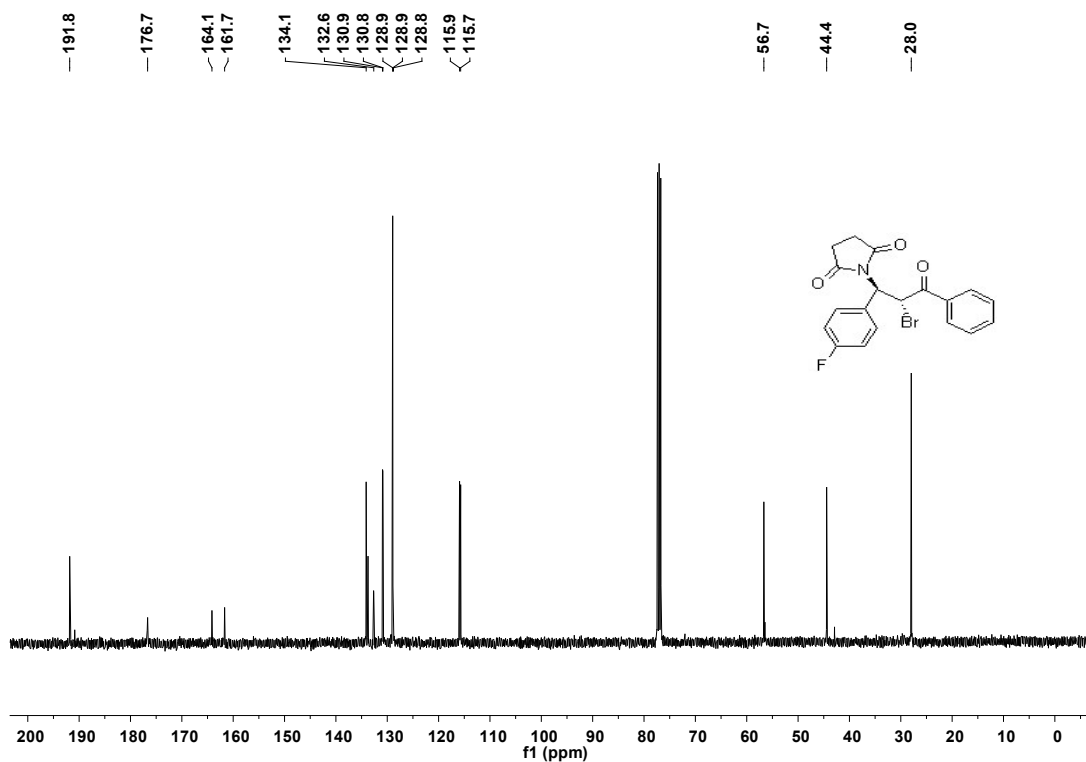



3f

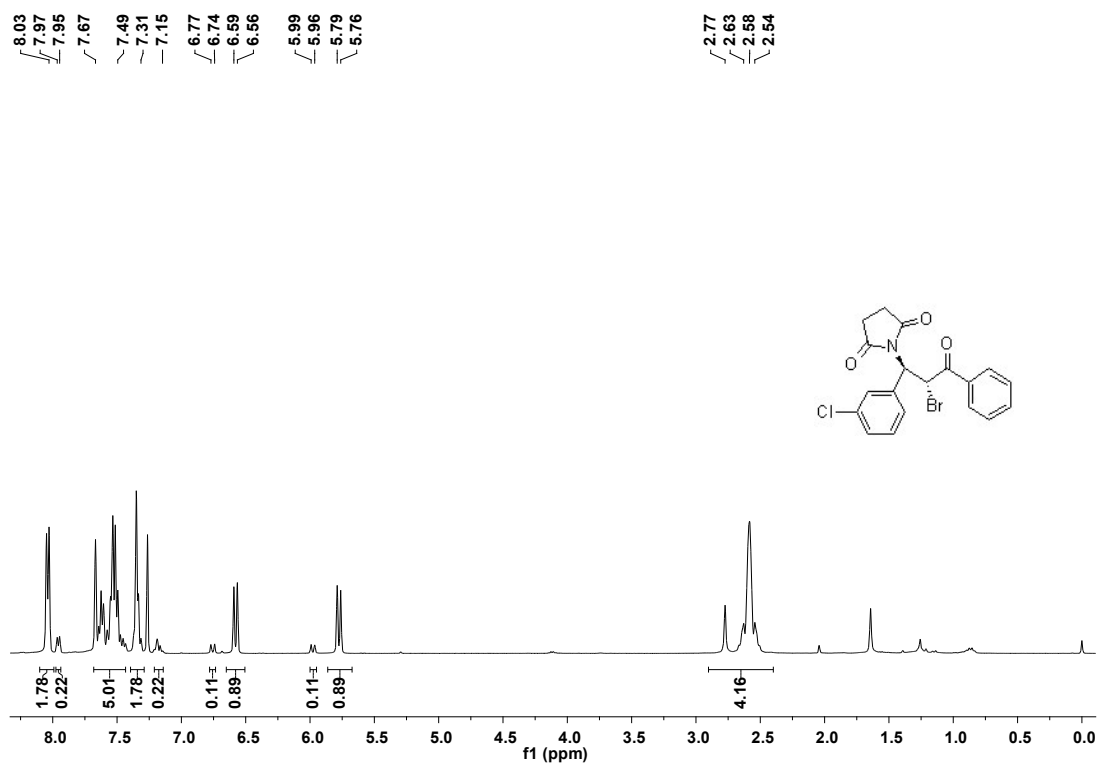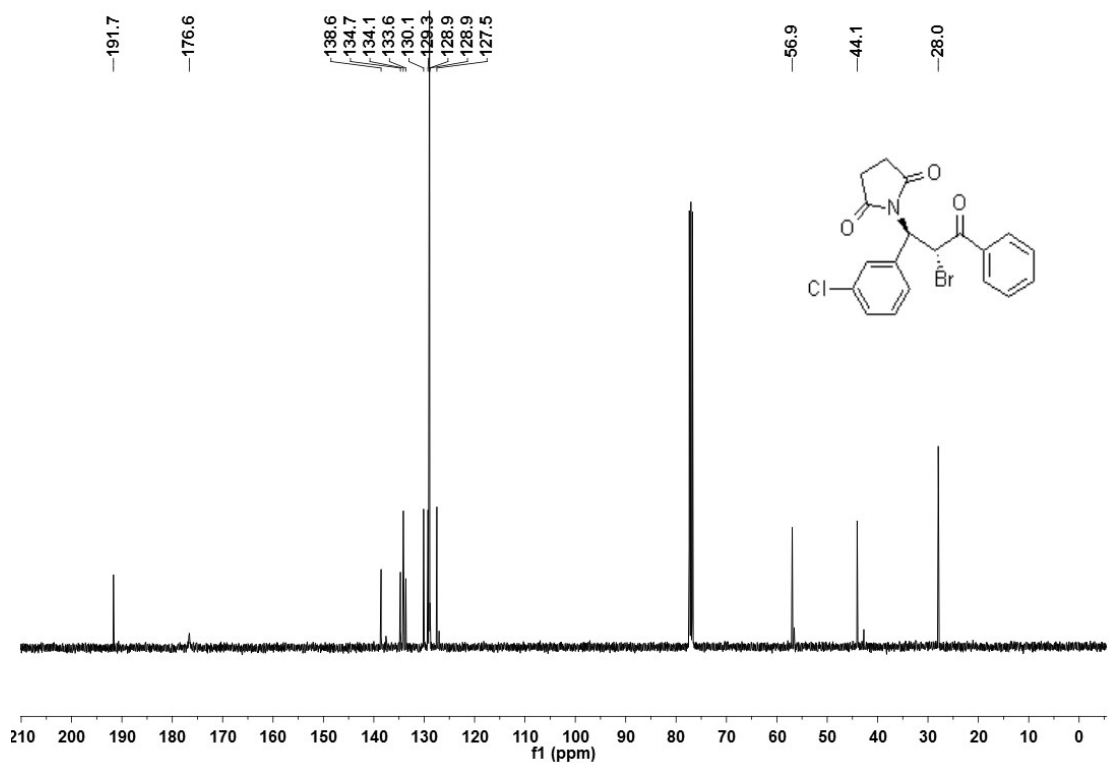

3g

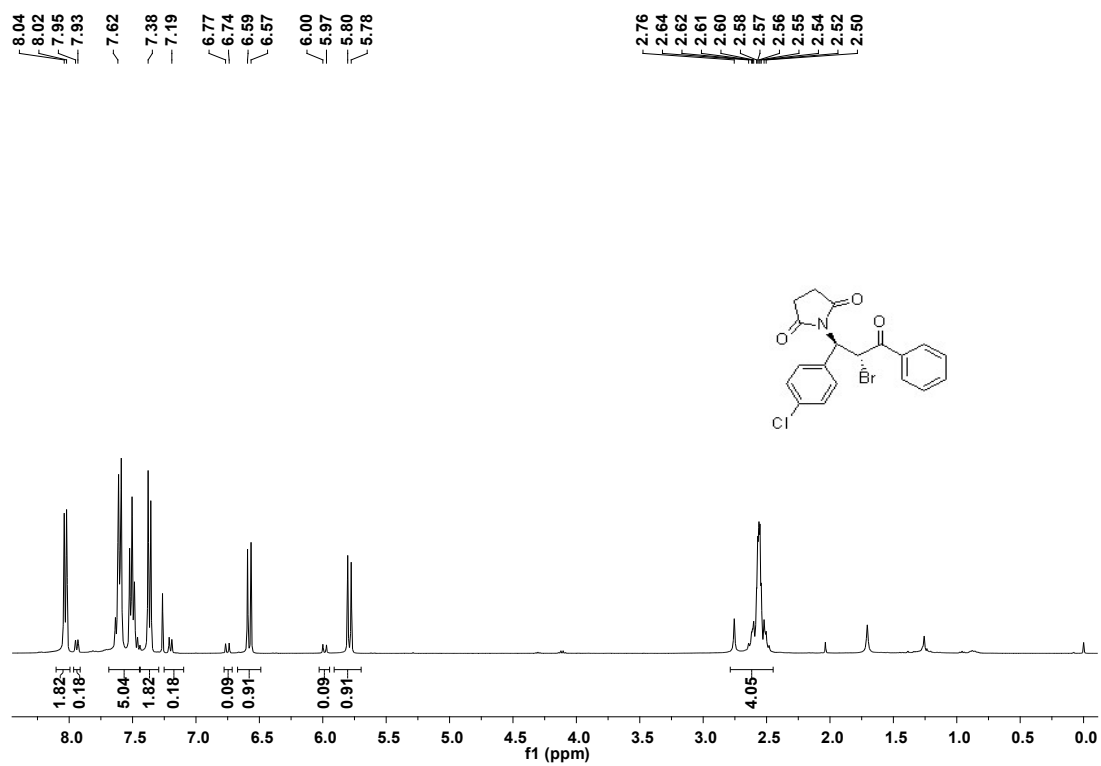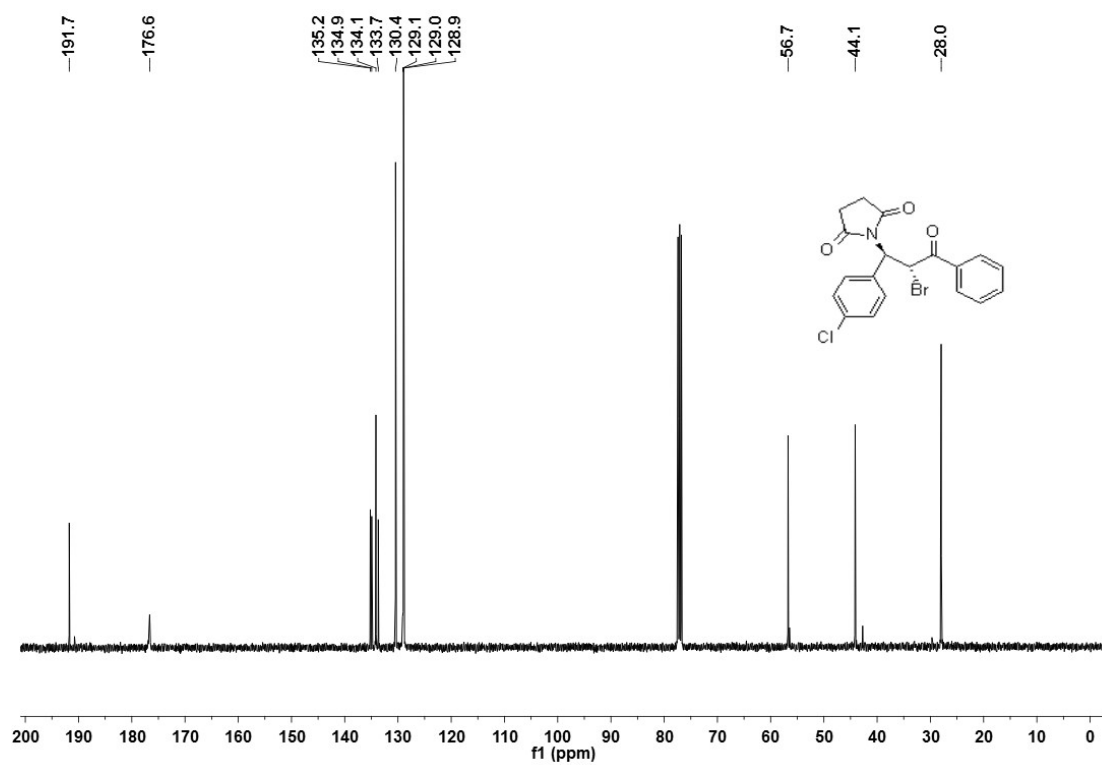

3h

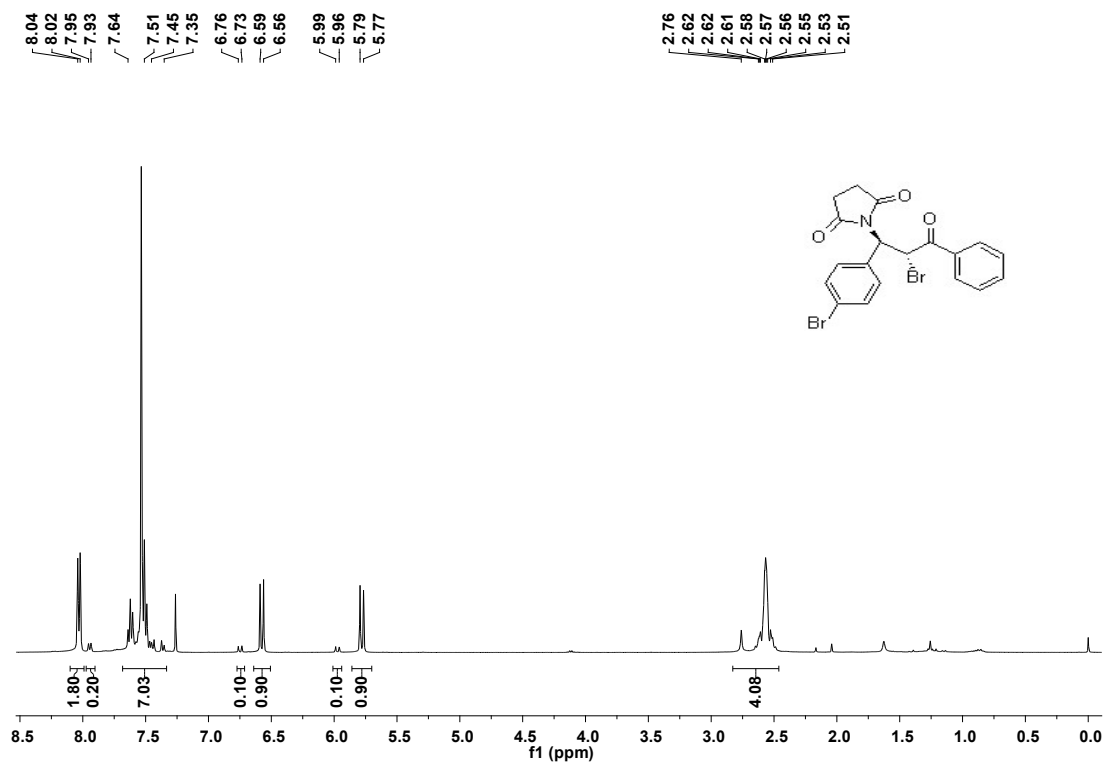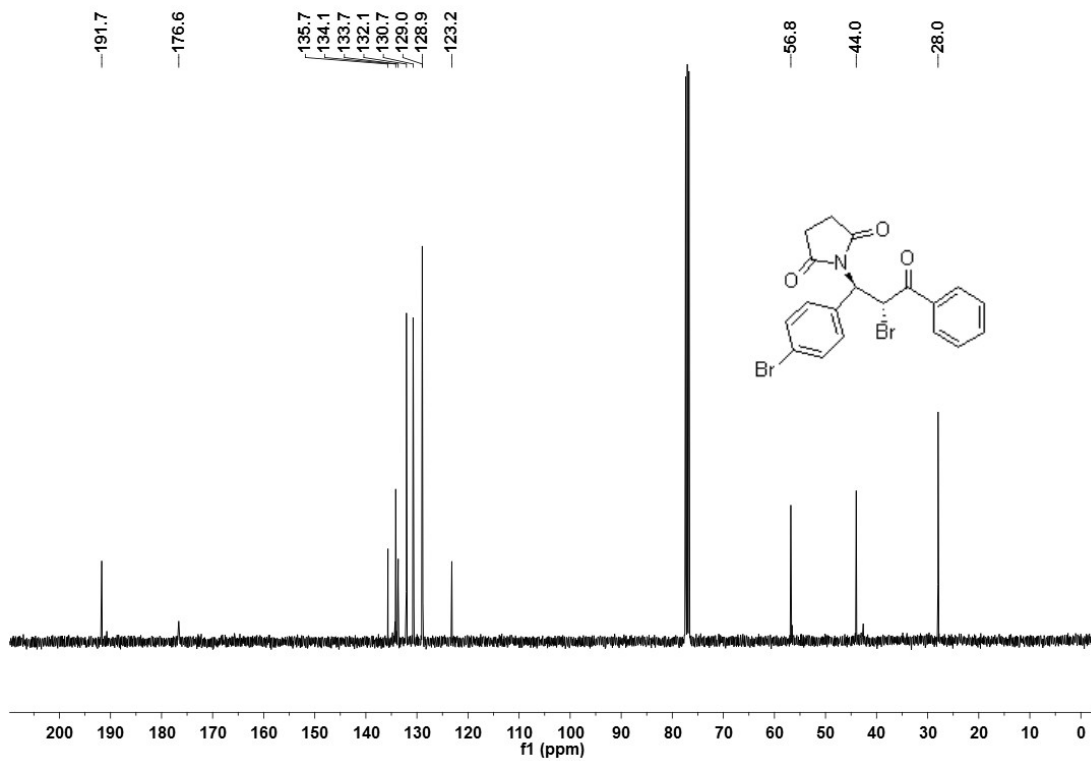

3i

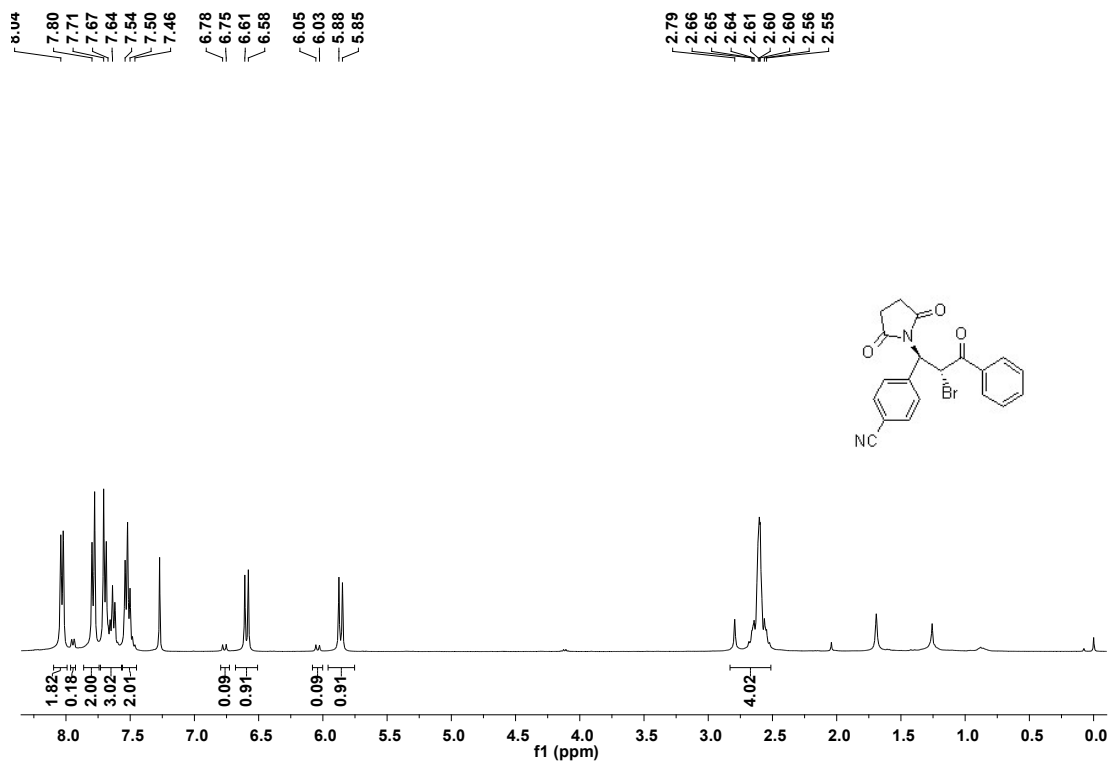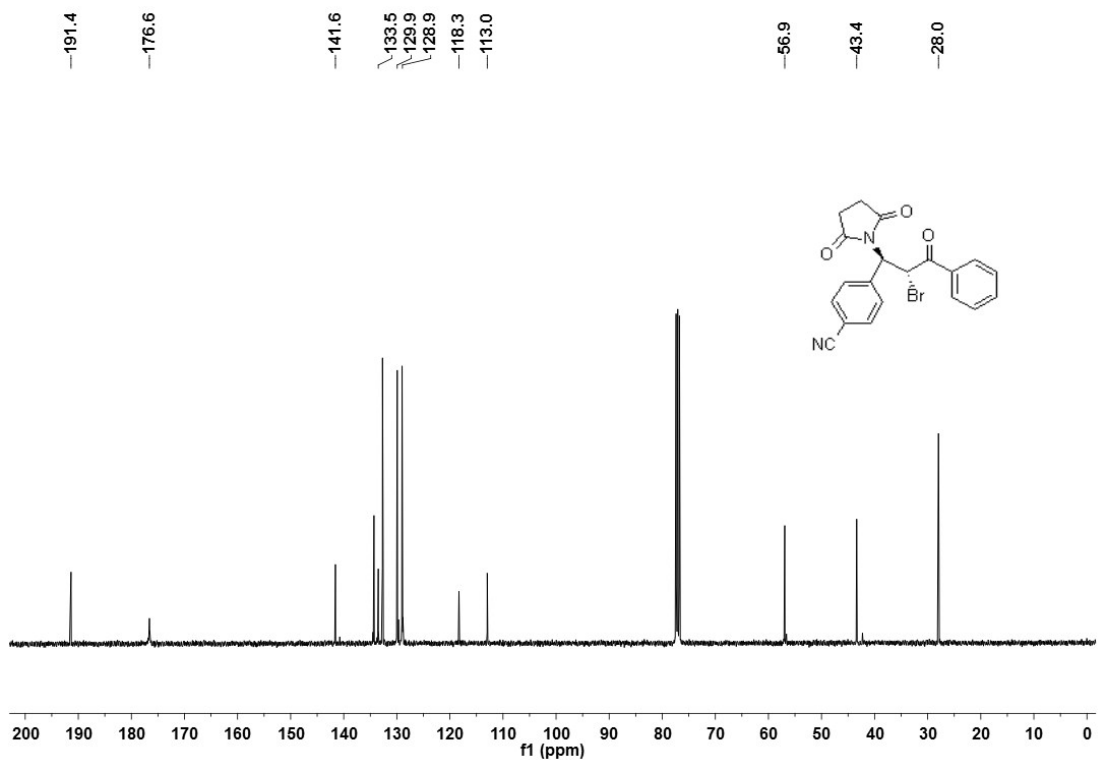

3j

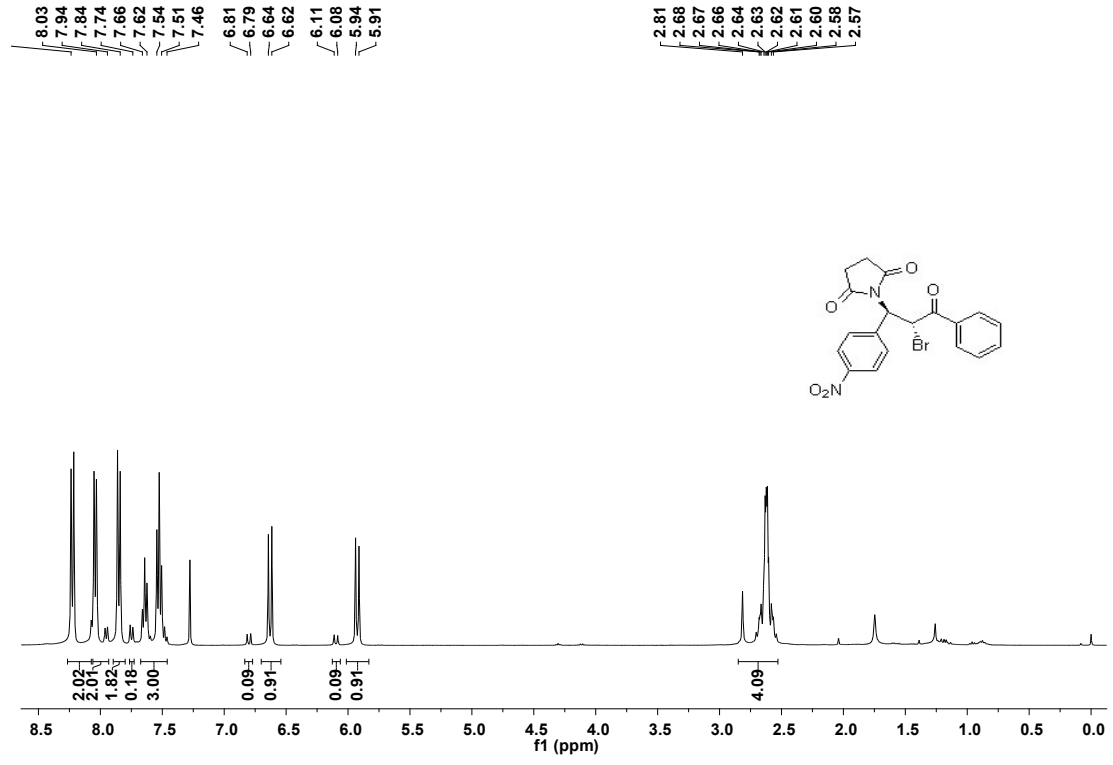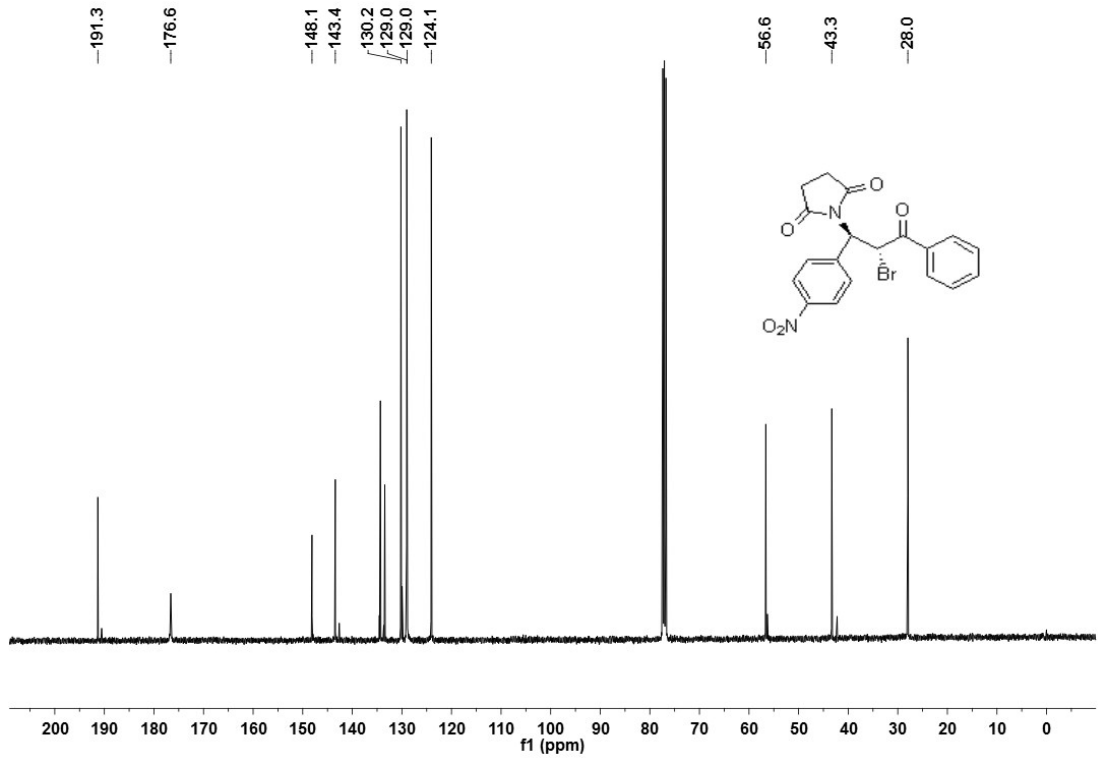

3k

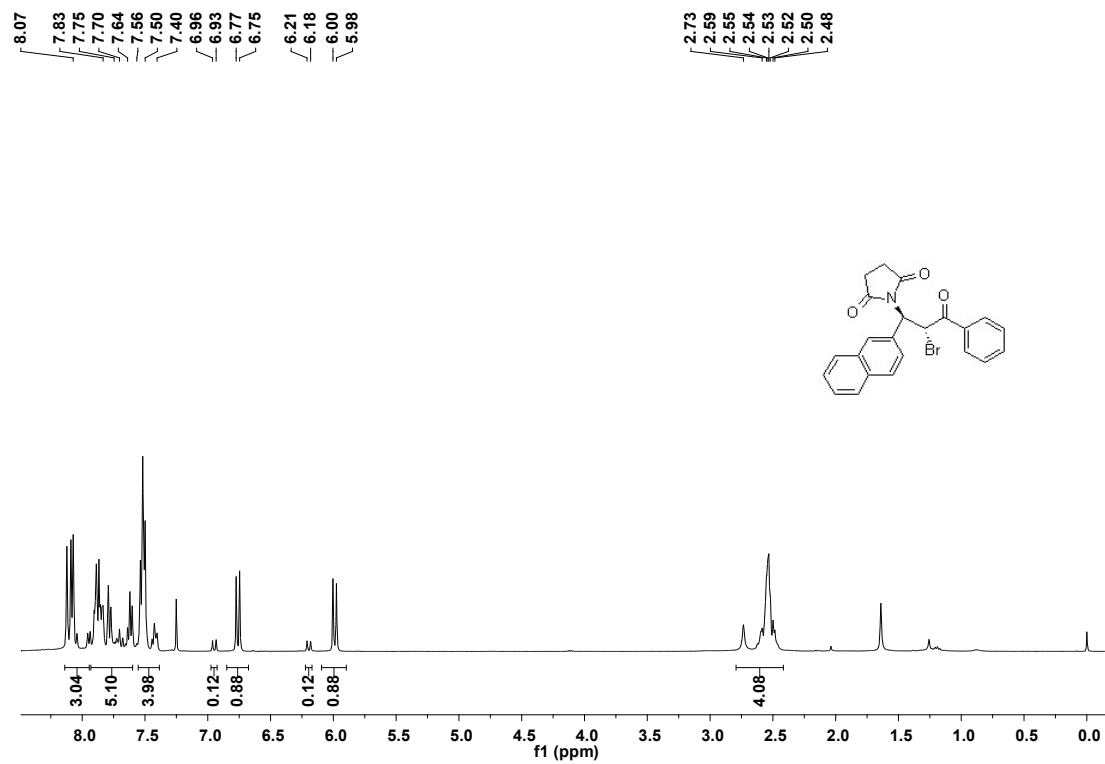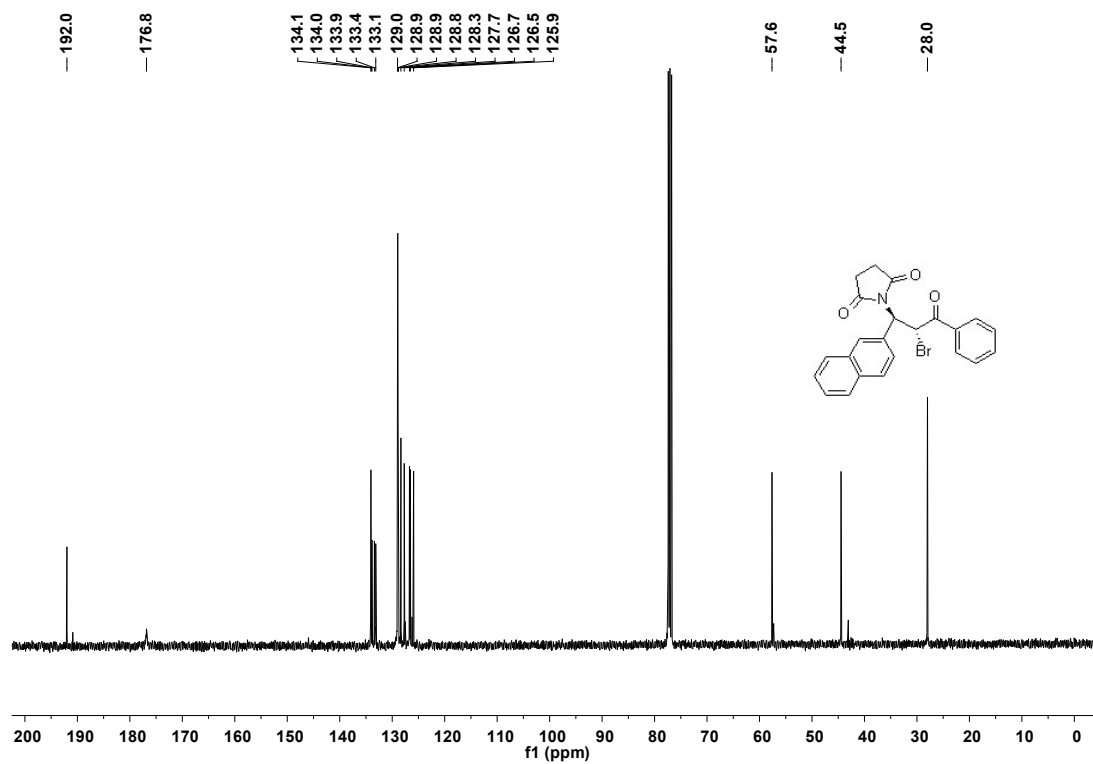

31

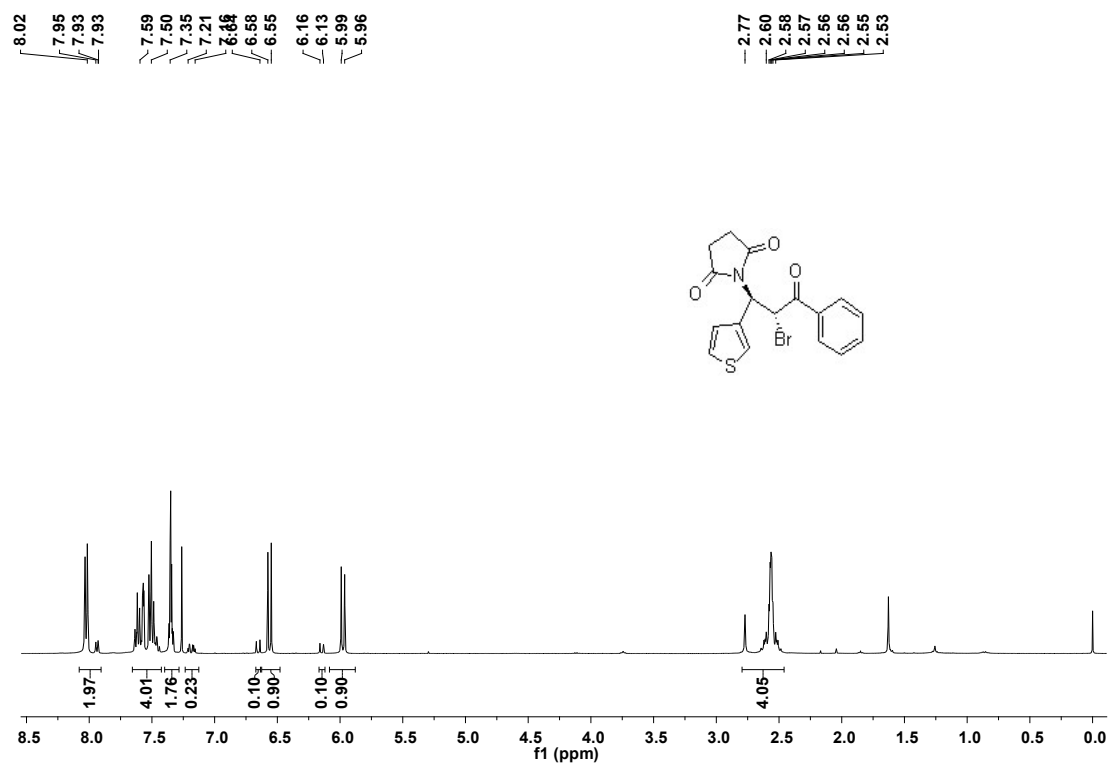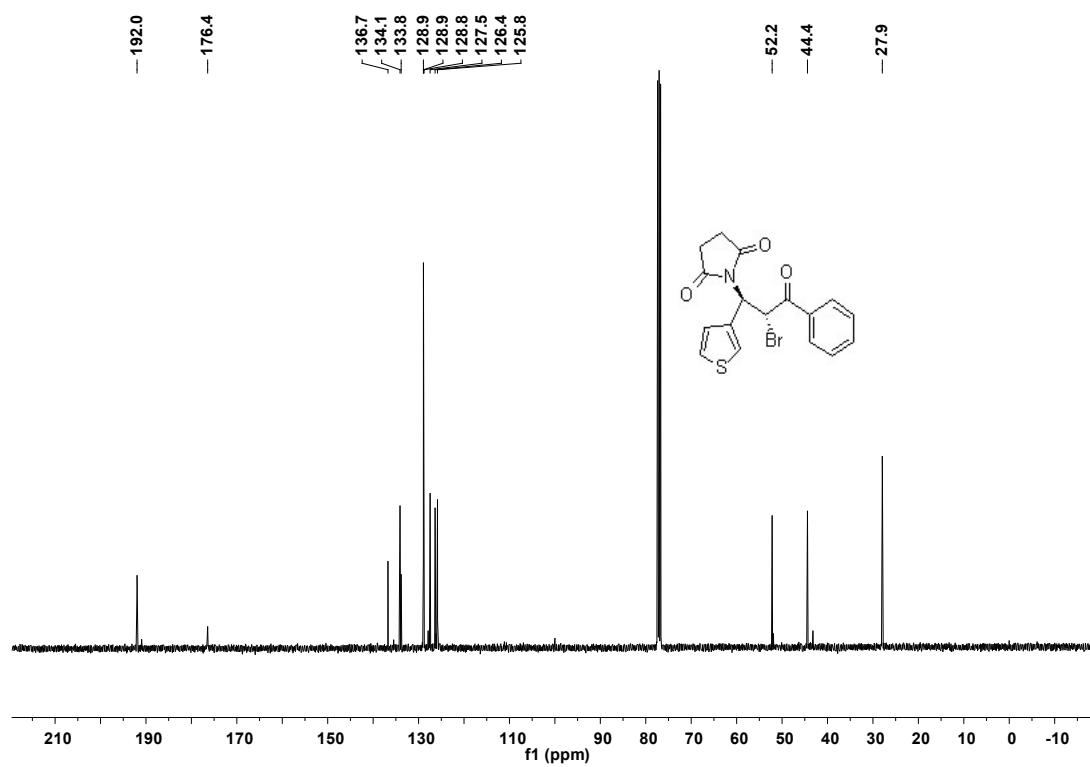

3m

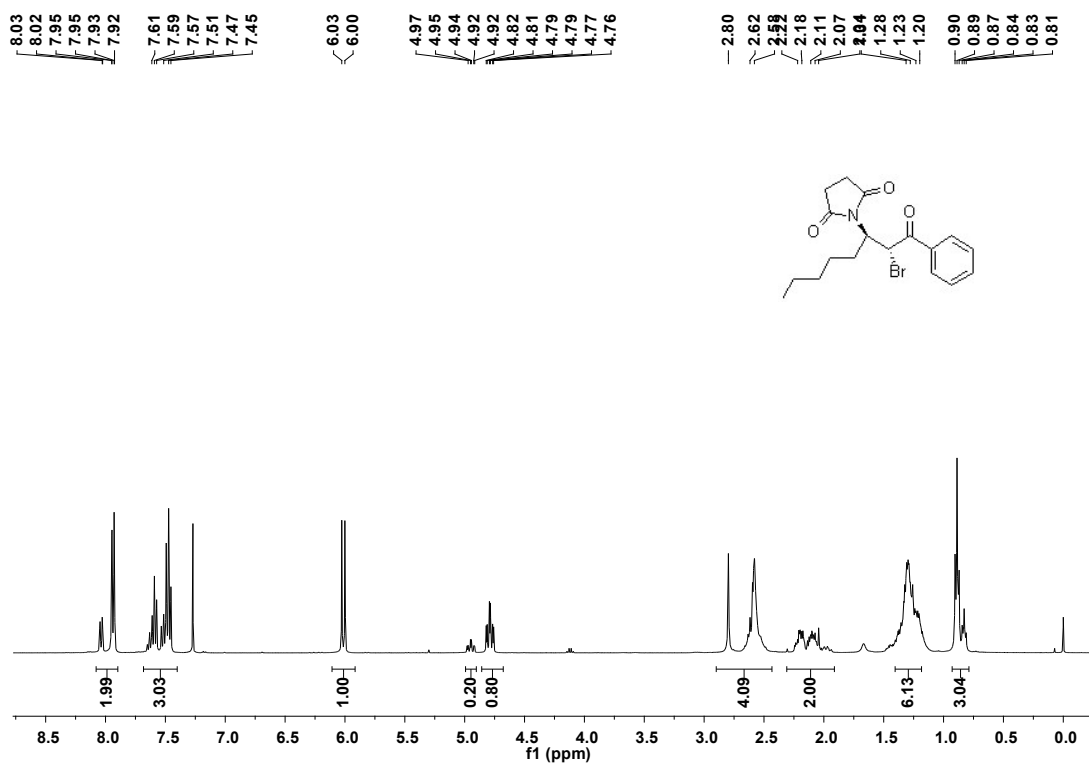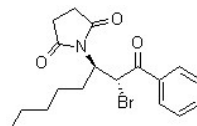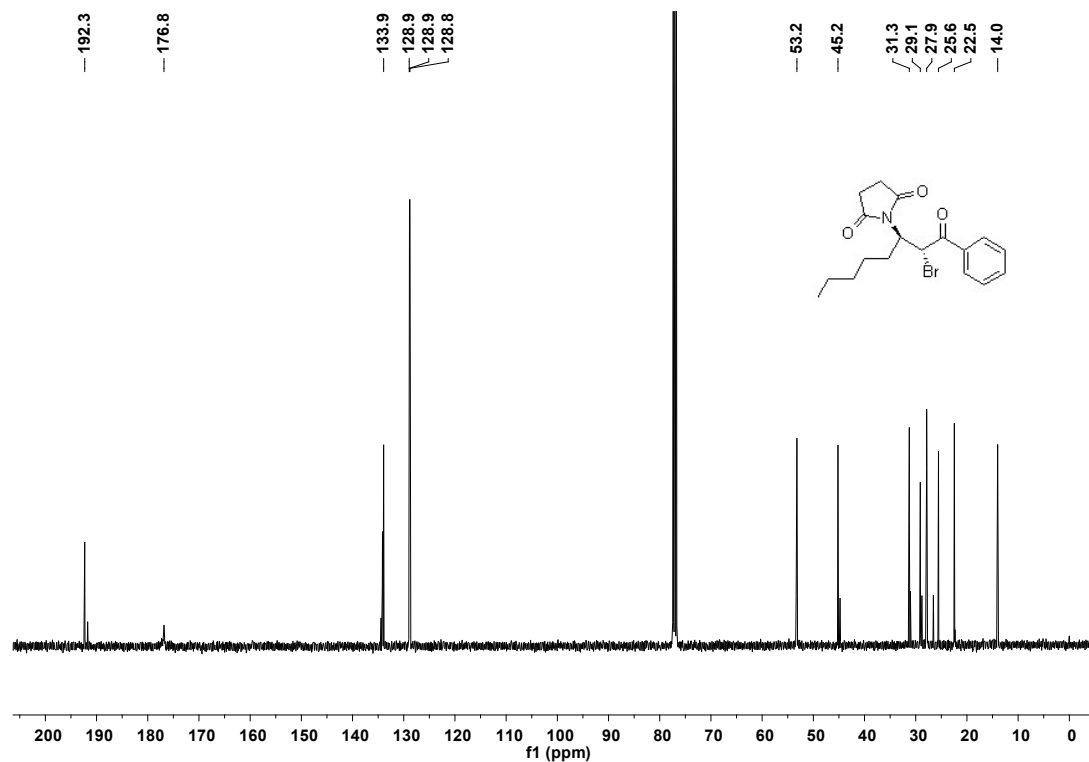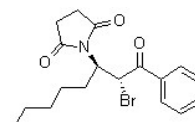



3n

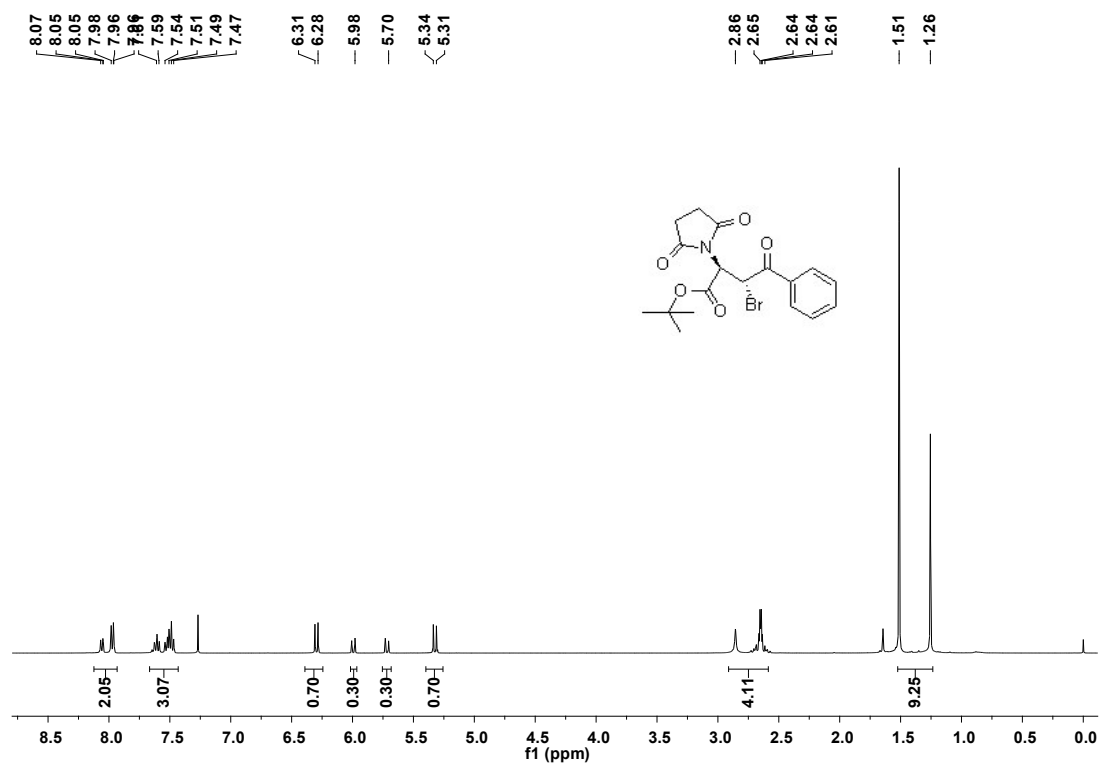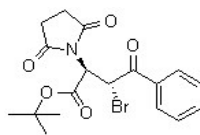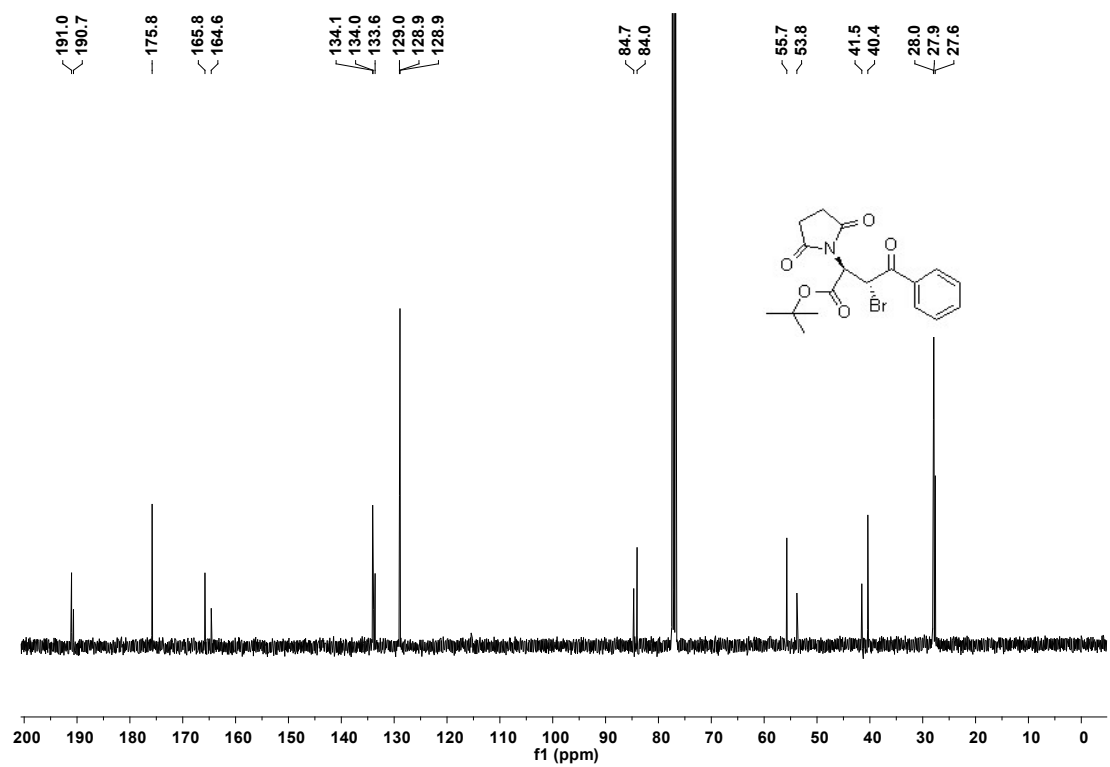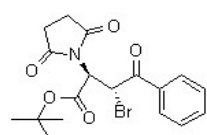

30

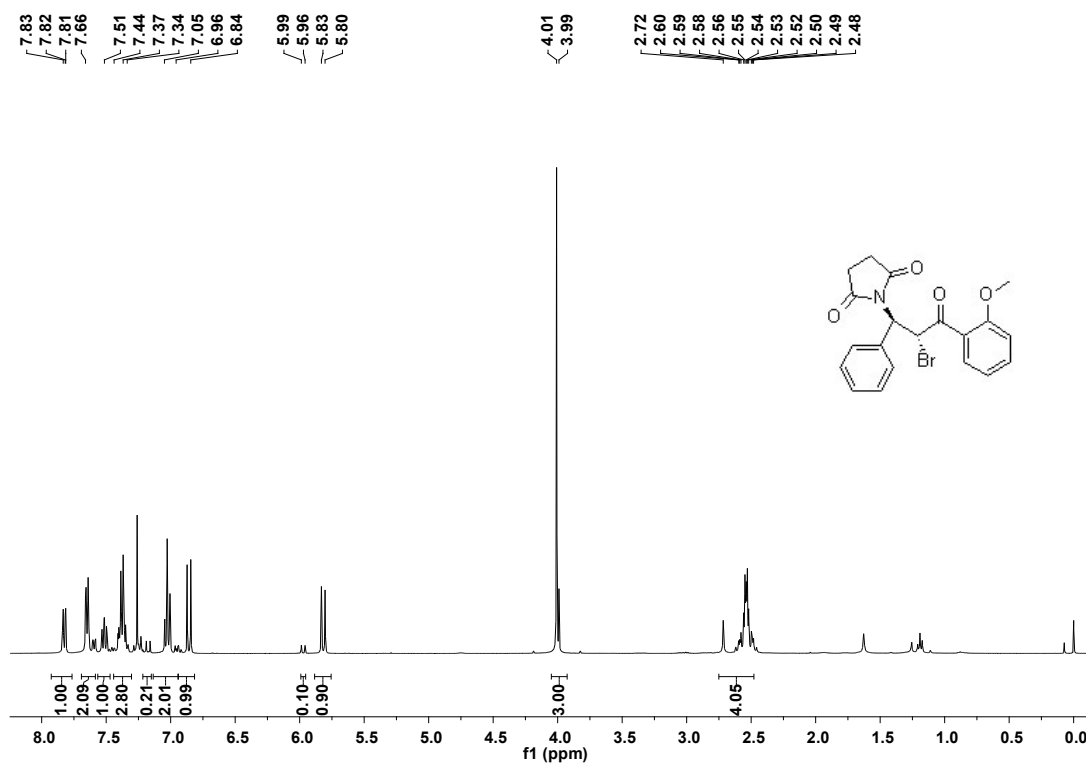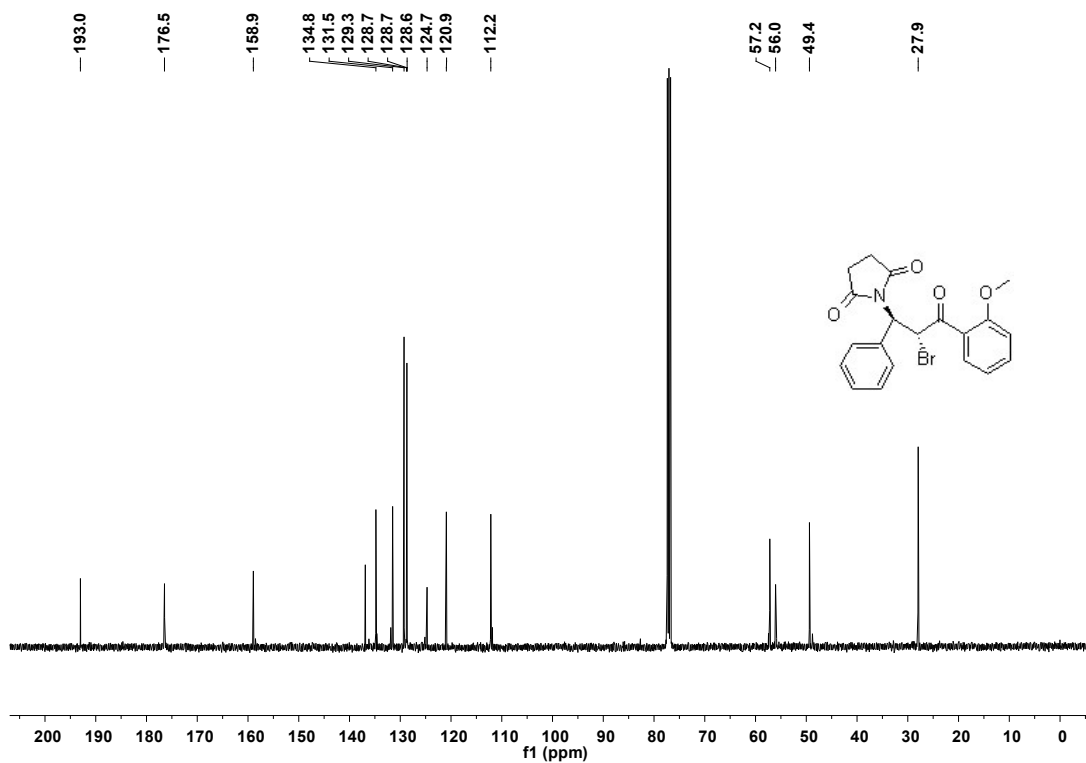

3p

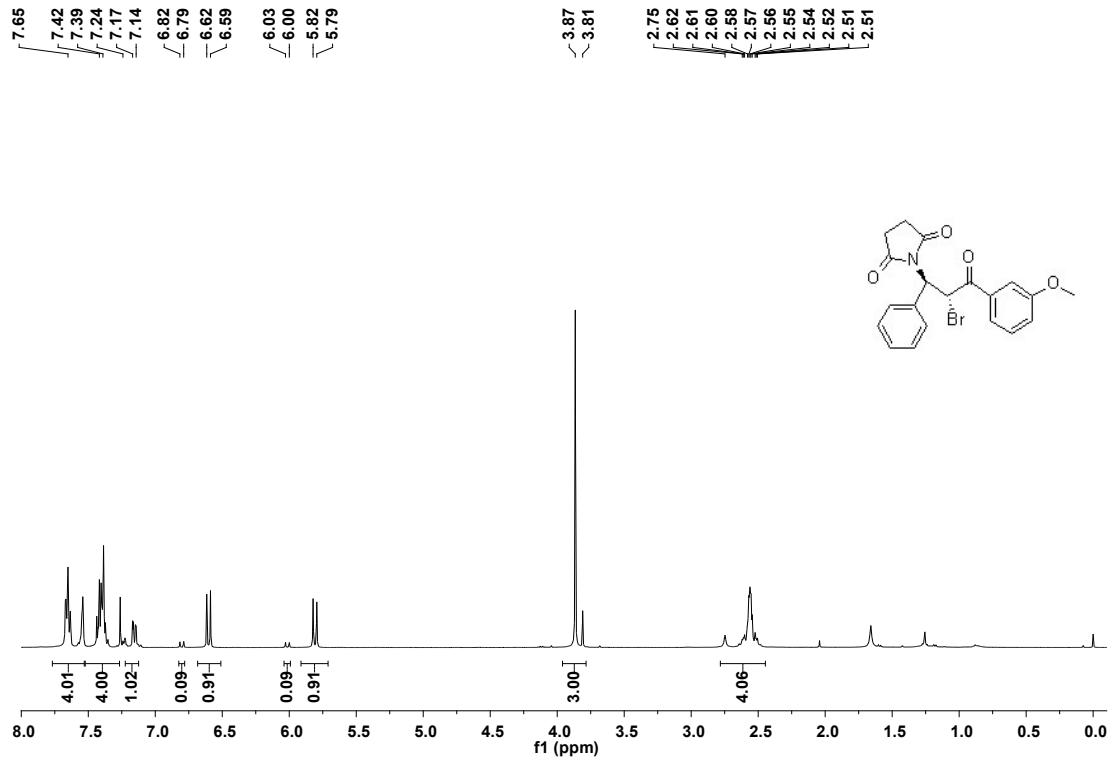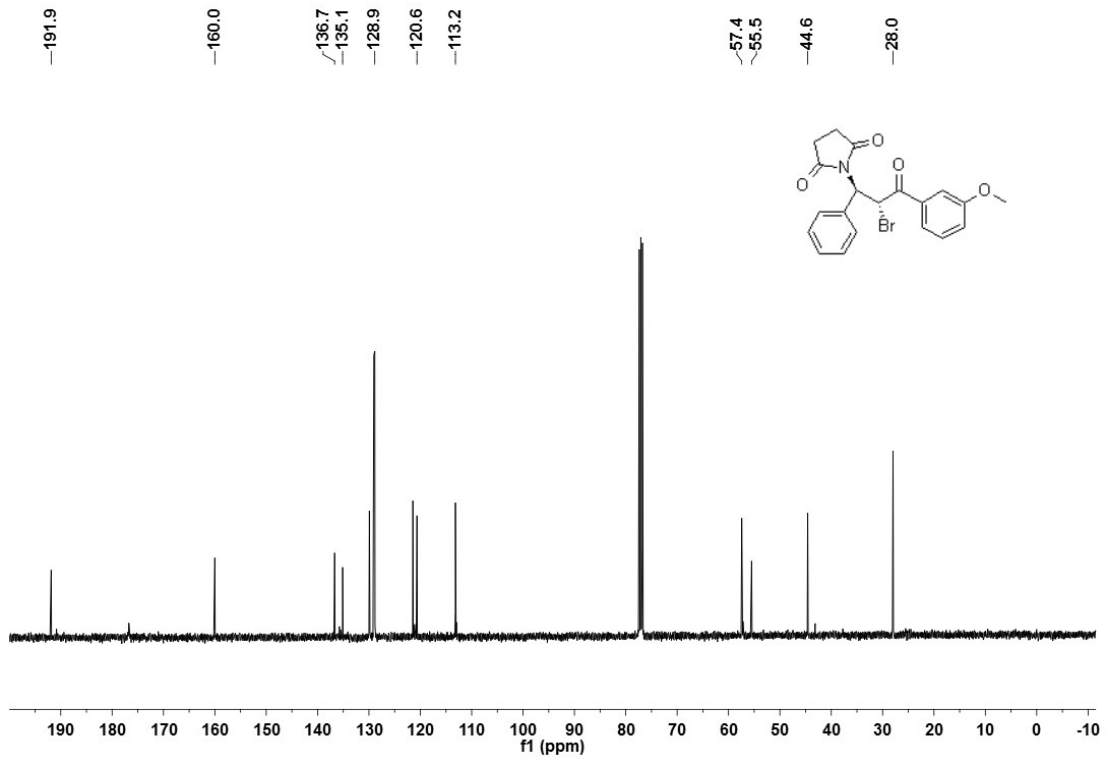

3q

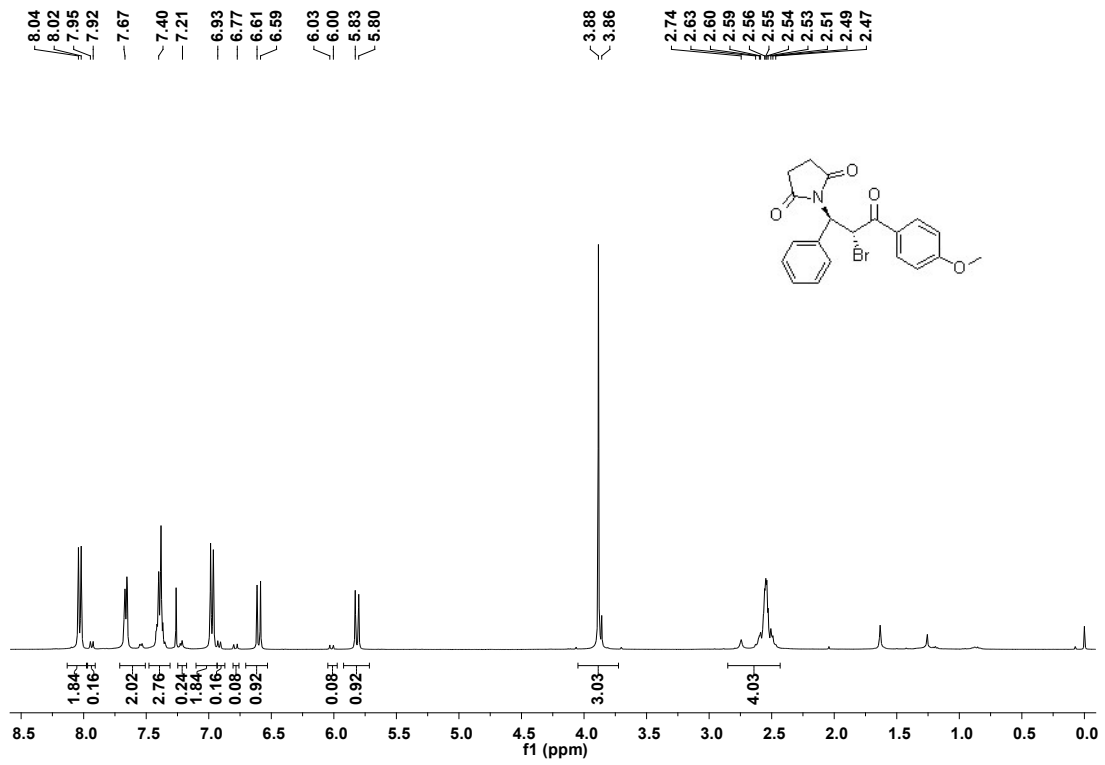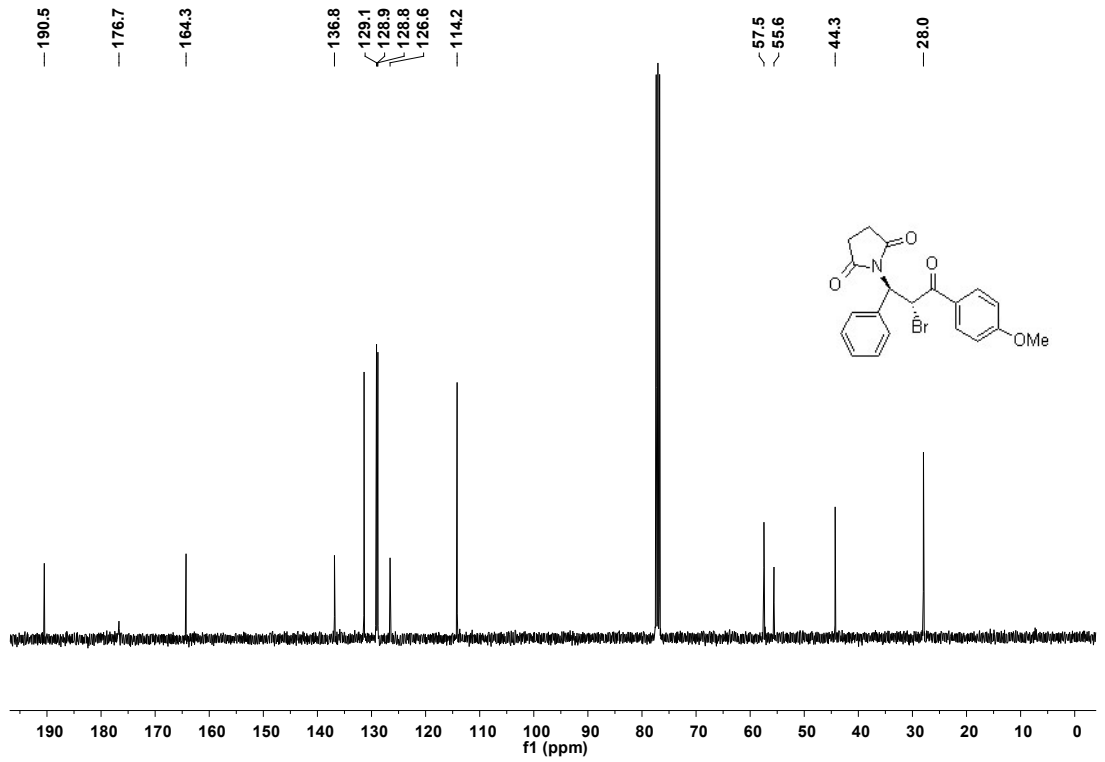

3r

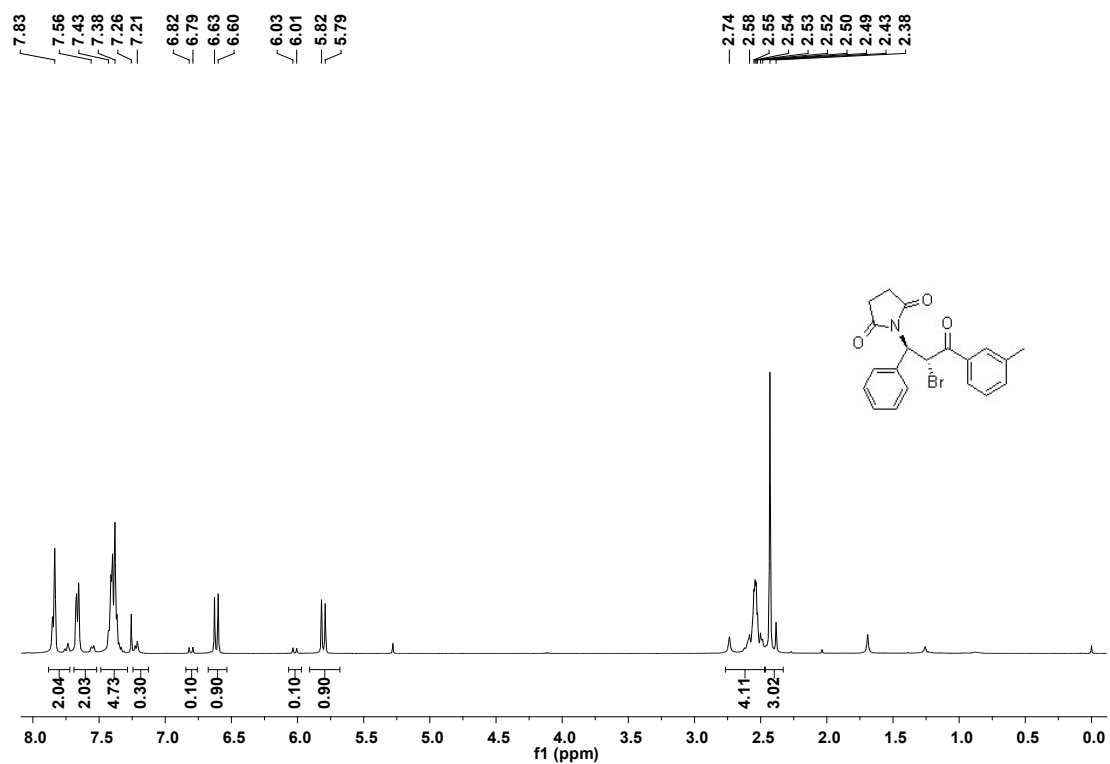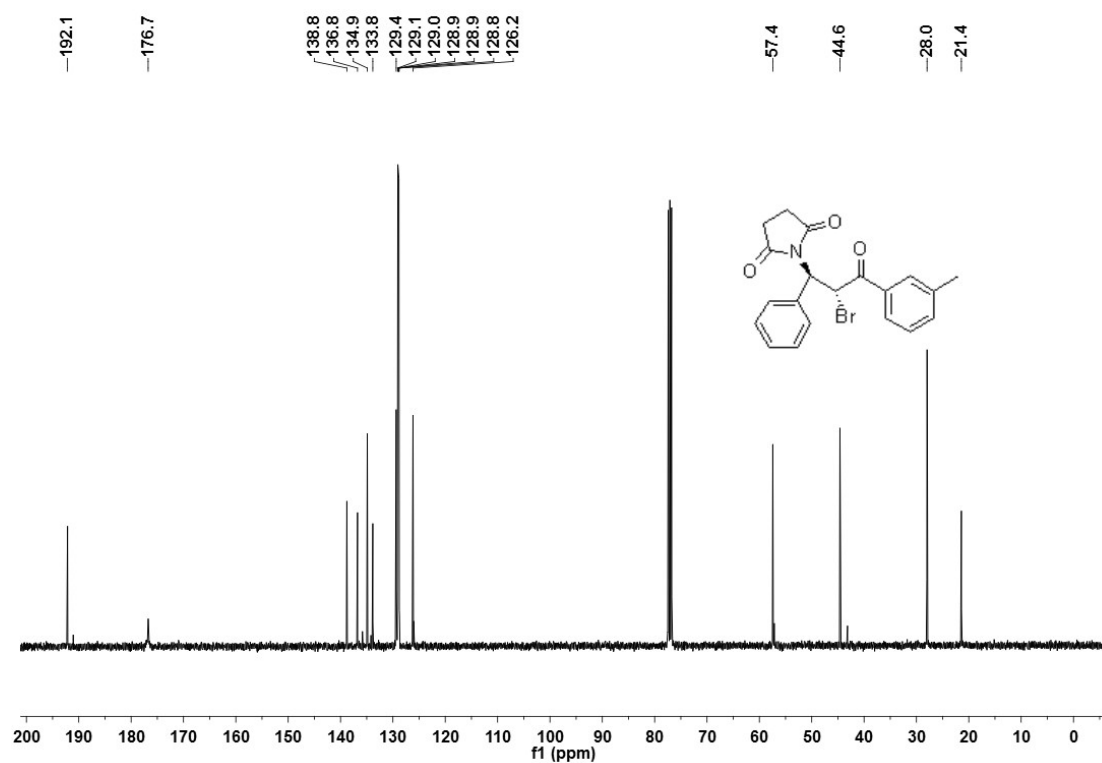

3s

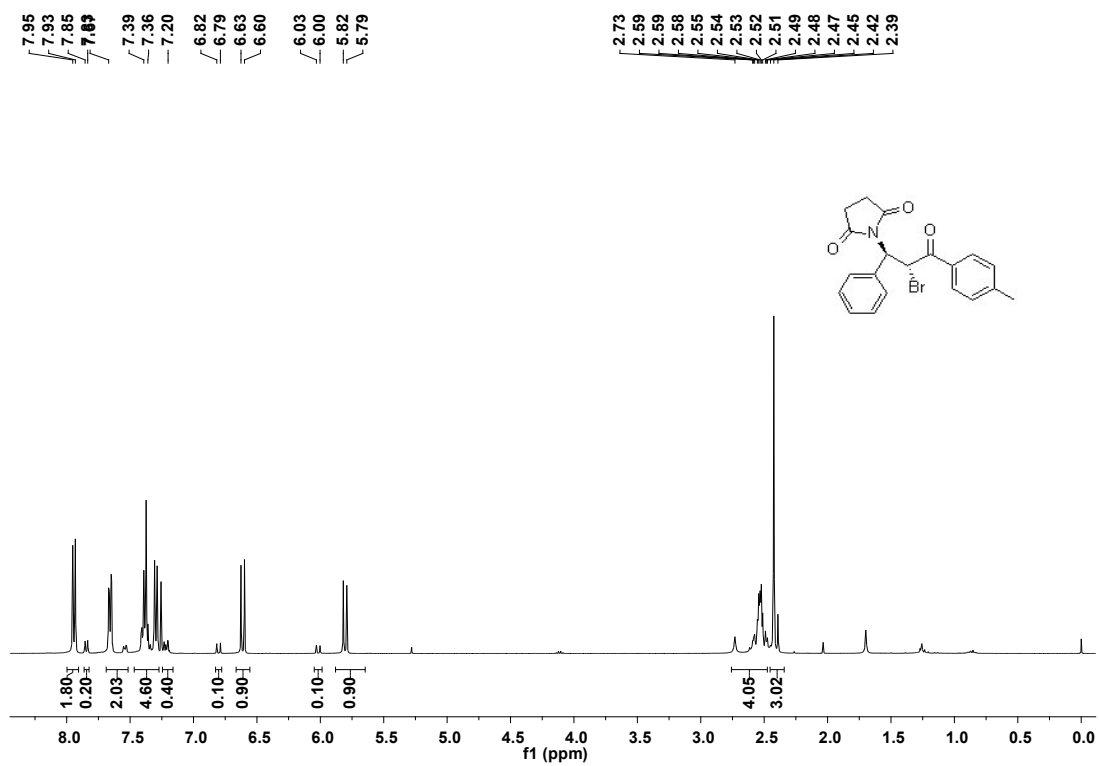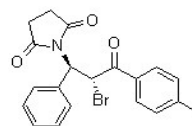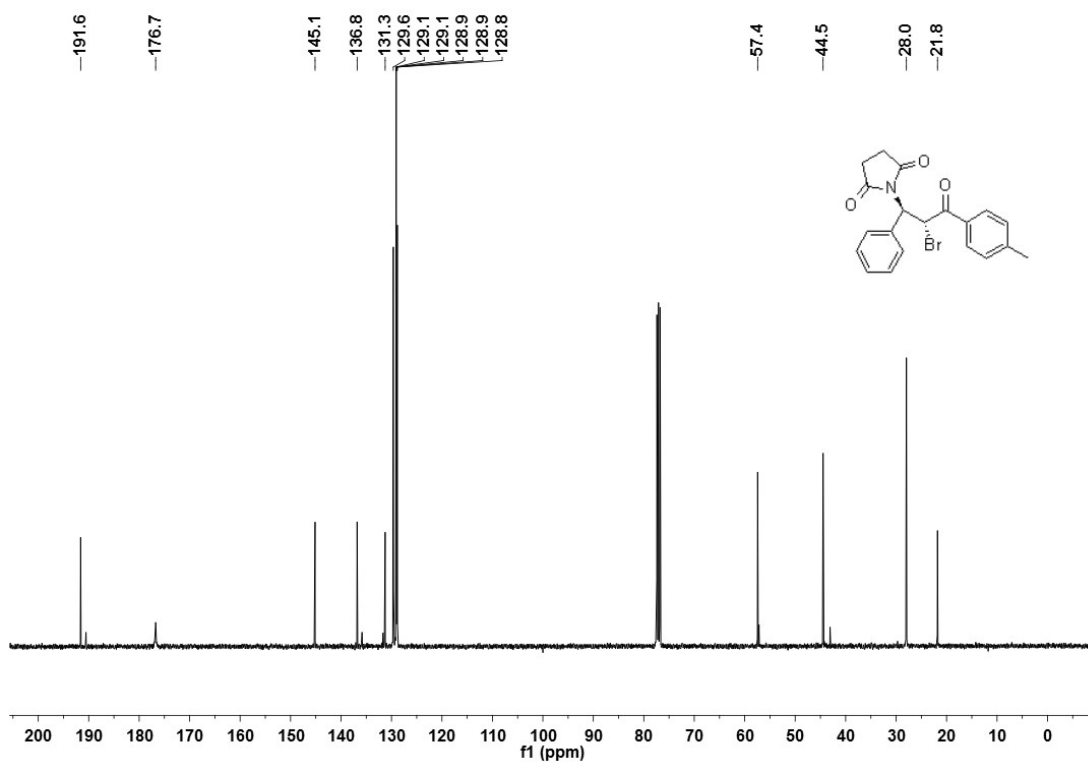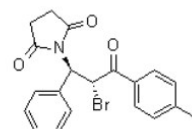

3t

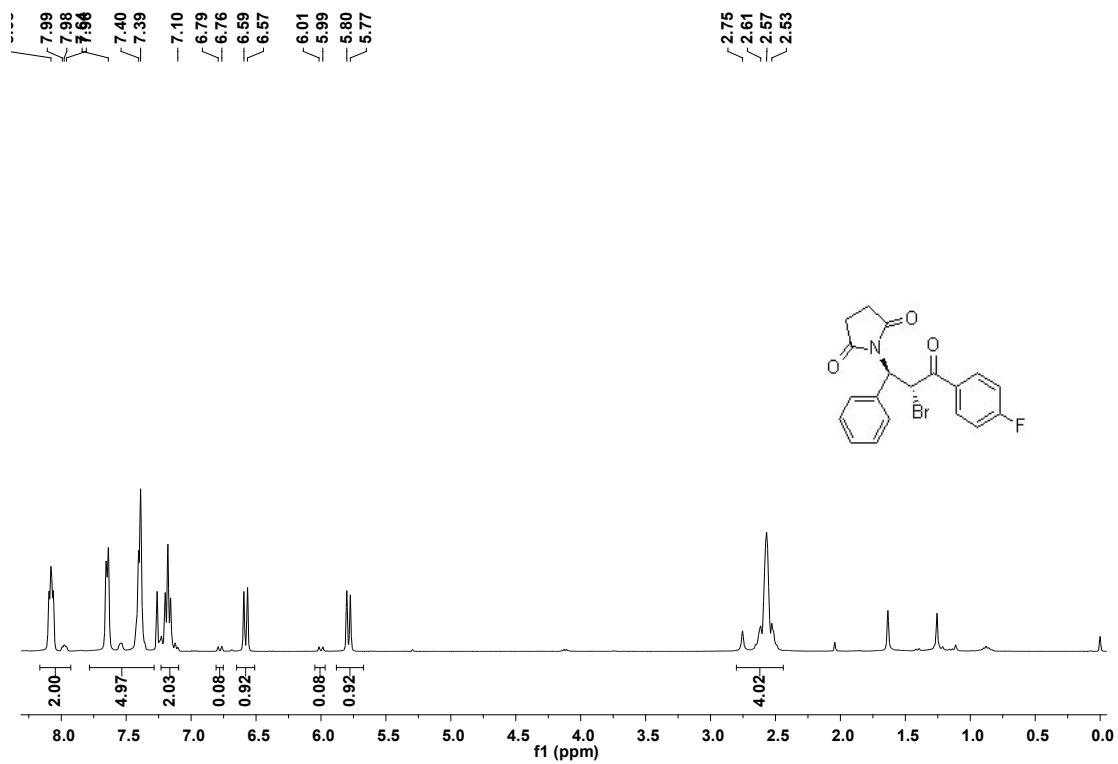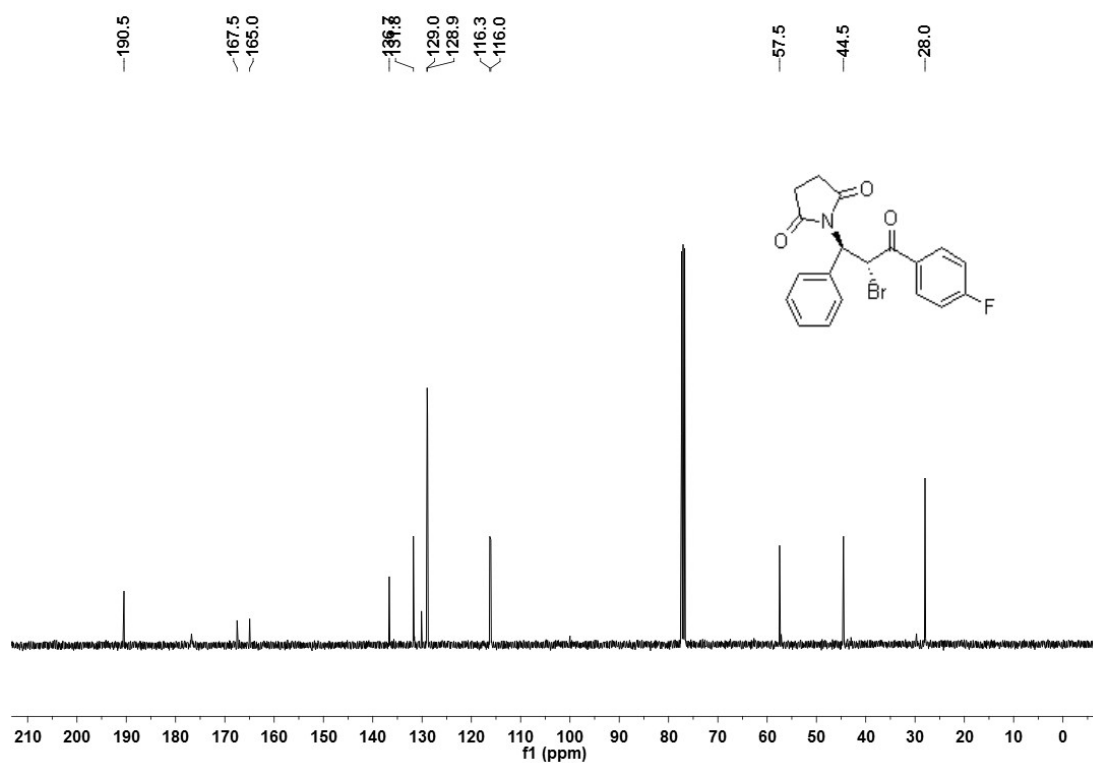

3u

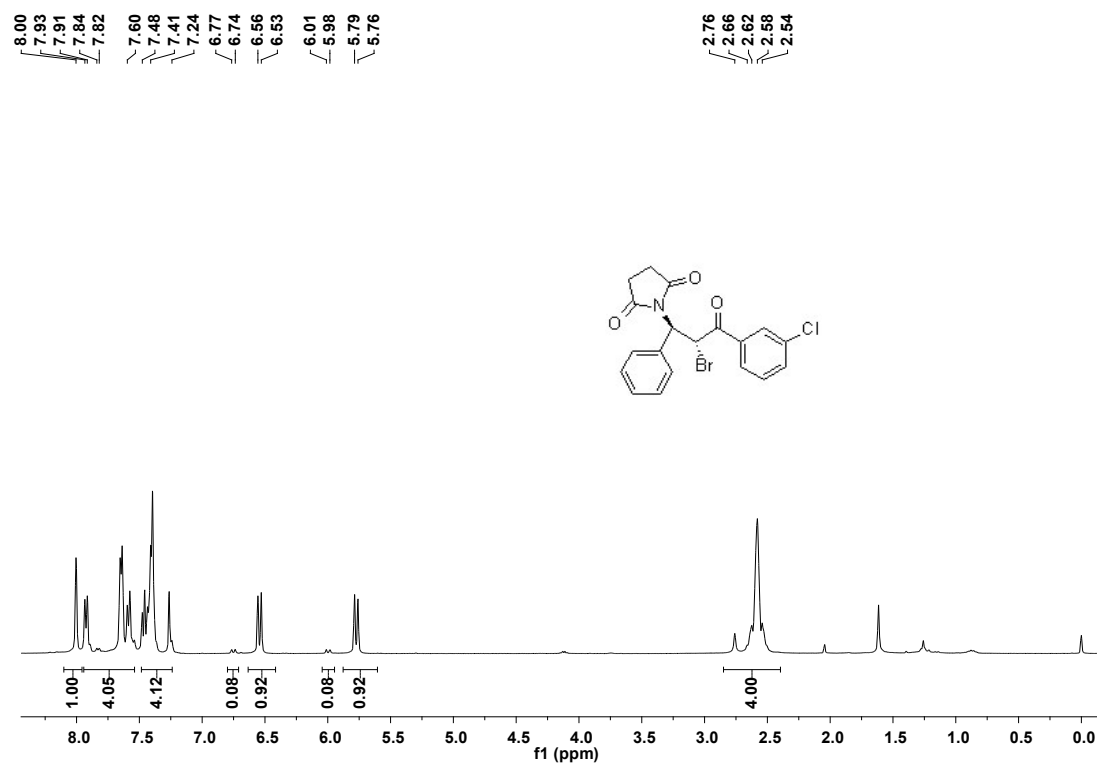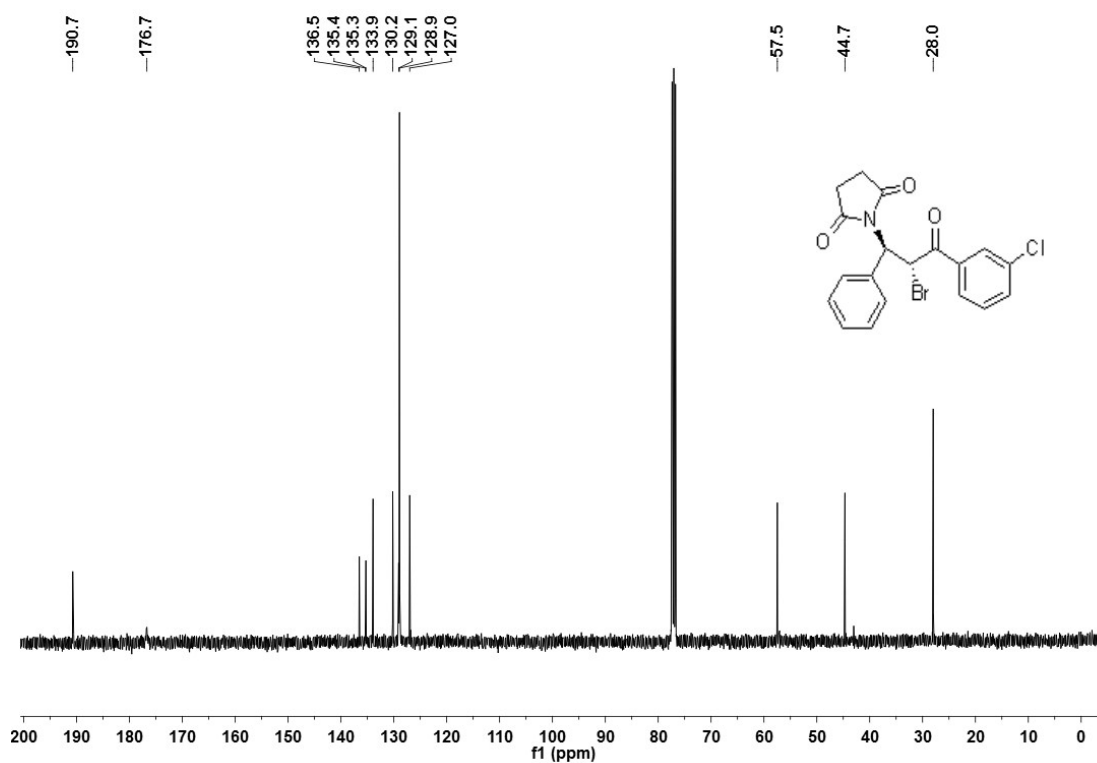



3v

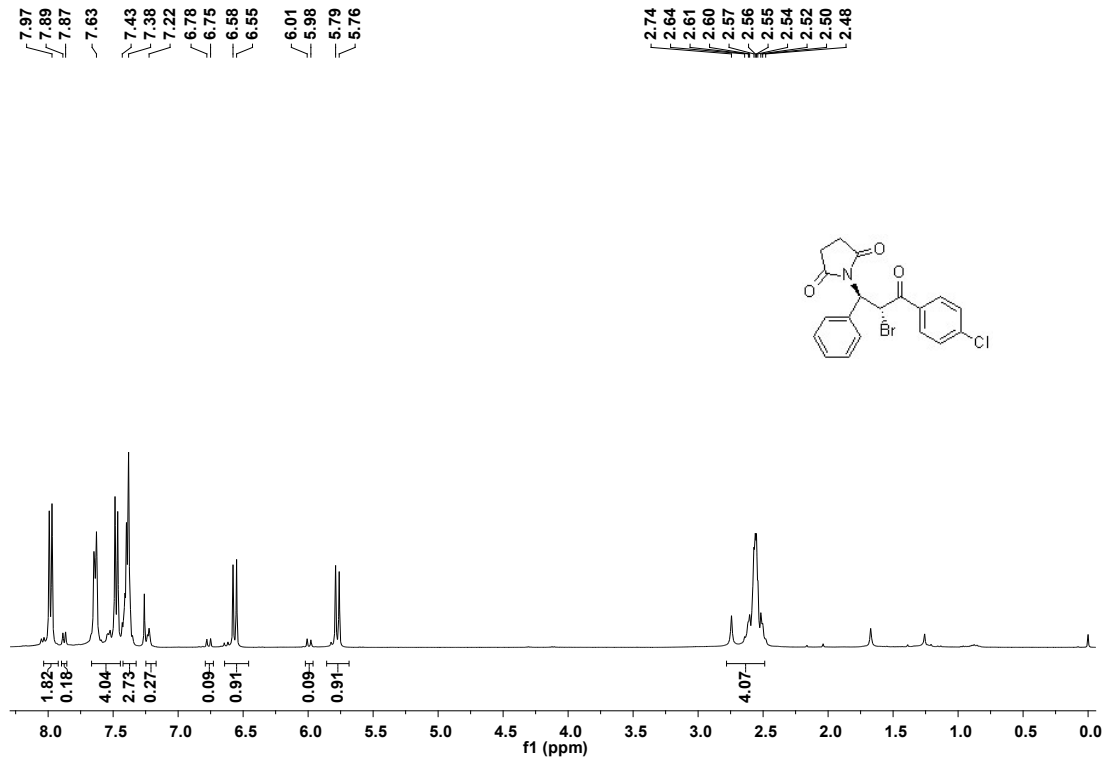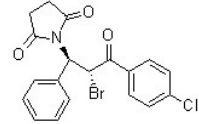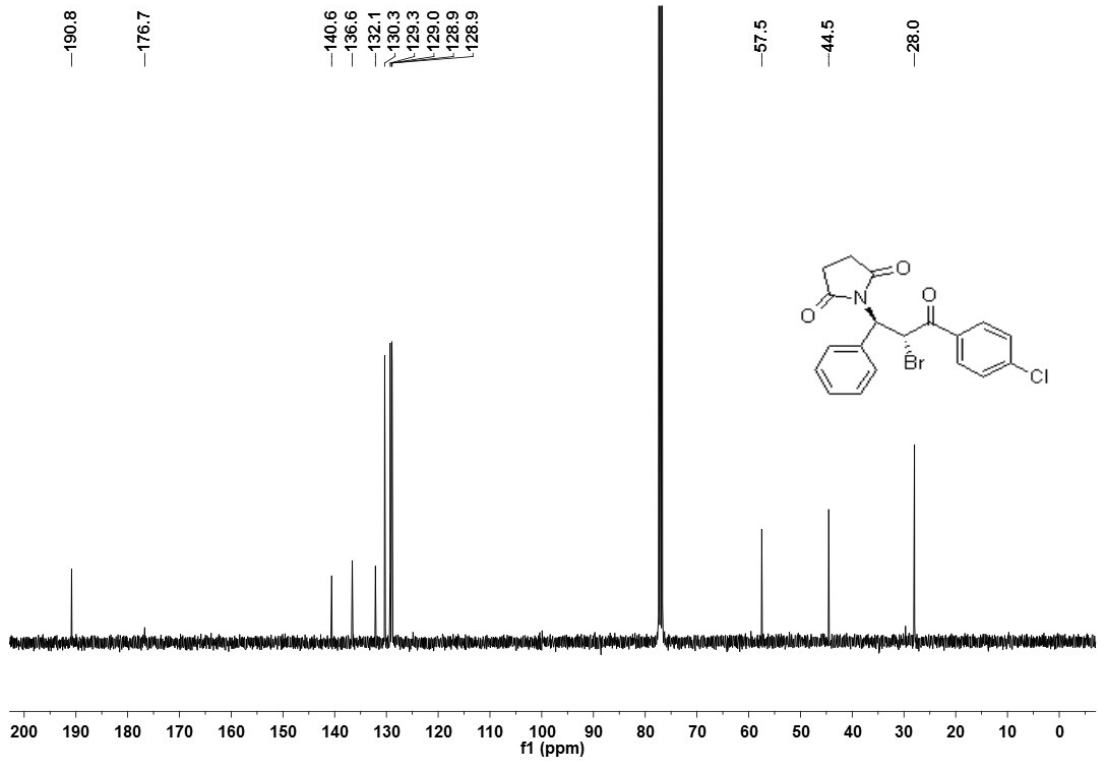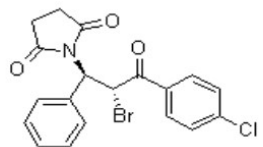

3w

7.91  
7.65  
7.89  
7.54  
7.52  
7.39  
7.35  
7.22  
6.77  
6.74  
6.57  
6.54  
6.00  
5.97  
5.78  
5.75

2.74  
2.63  
2.61  
2.60  
2.56  
2.55  
2.54  
2.53  
2.51  
2.49

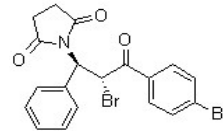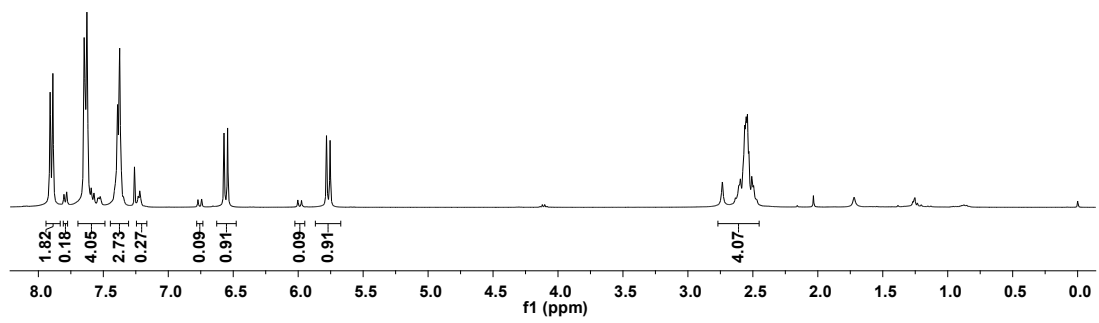

191.0

176.8

136.6

132.5

132.3

130.4

129.4

129.1

129.0

128.9

57.5

44.6

28.0

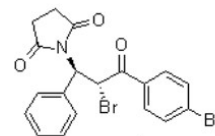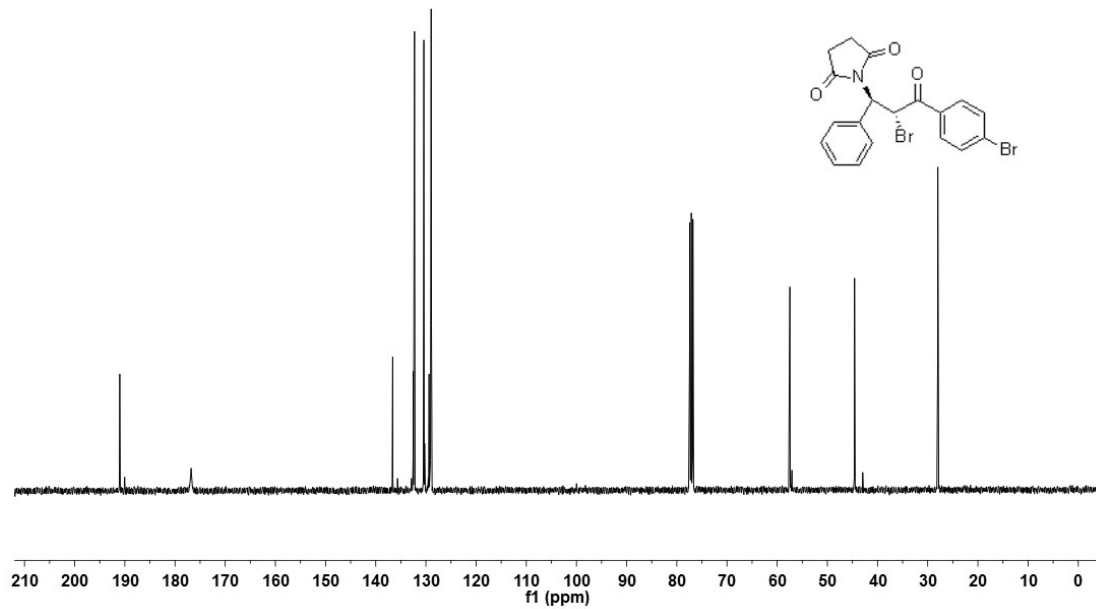

3x

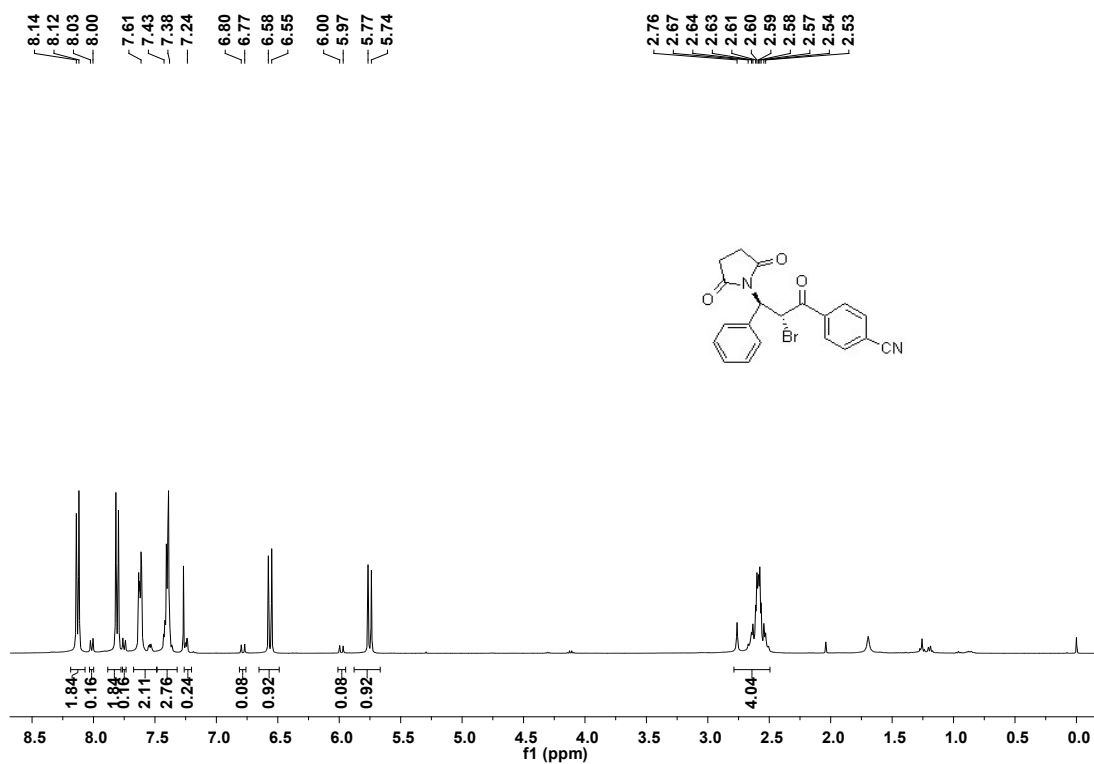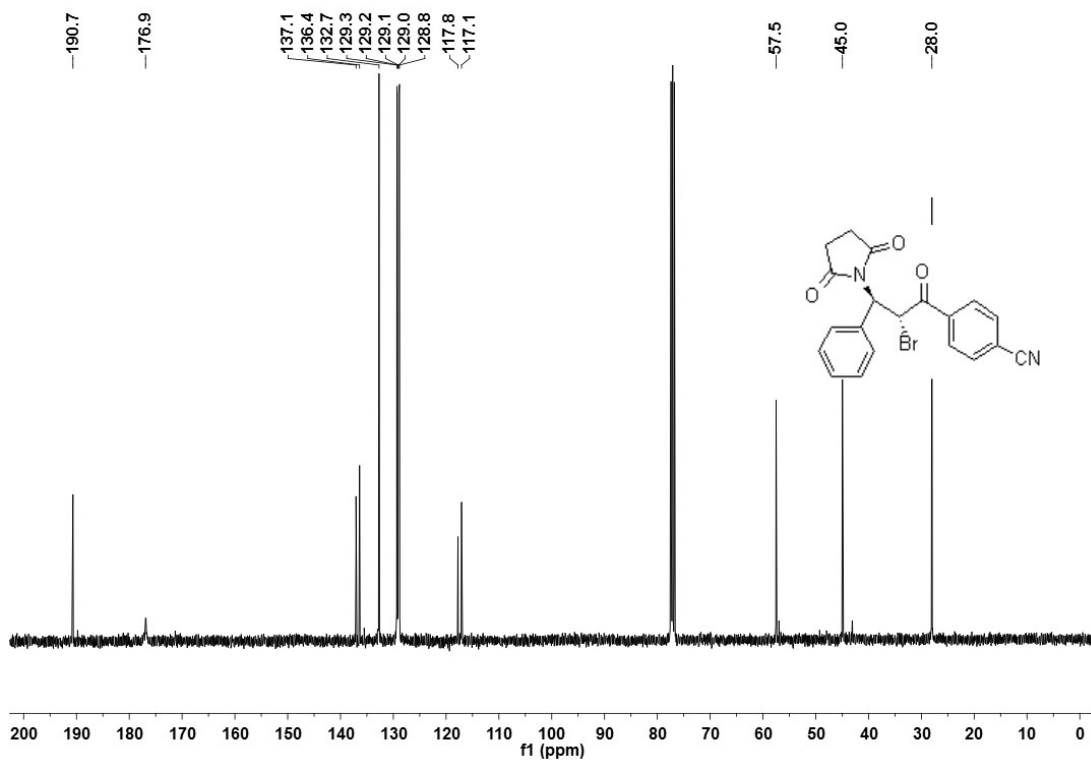

3y

8.34  
8.30  
8.22  
8.19  
8.10  
8.08  
7.64  
7.43  
7.41  
7.25  
6.82  
6.80  
6.60  
6.57  
6.00  
5.98  
5.77  
5.75

2.78  
2.66  
2.65  
2.63  
2.62  
2.60  
2.59  
2.58  
2.56  
2.55

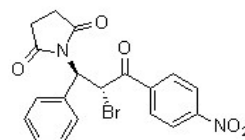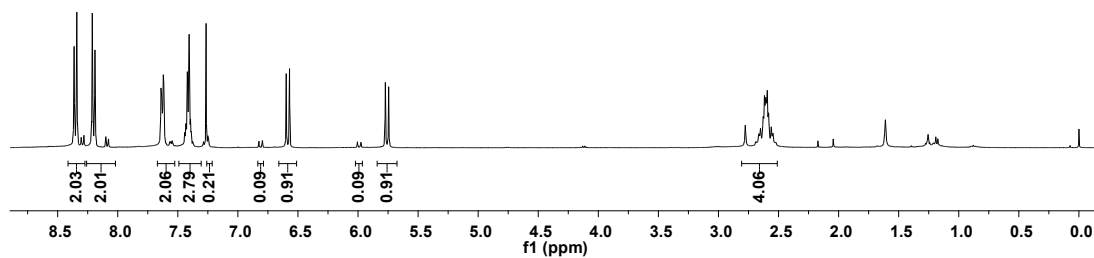

191.3  
176.6  
148.2  
143.4  
133.5  
130.0  
129.0  
124.1

56.6  
43.3  
28.0

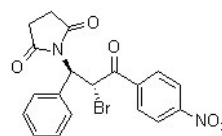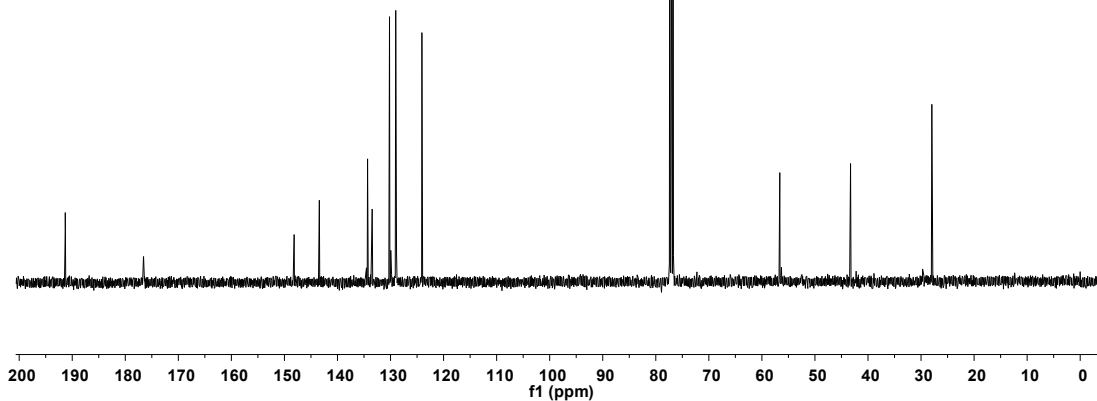

3z

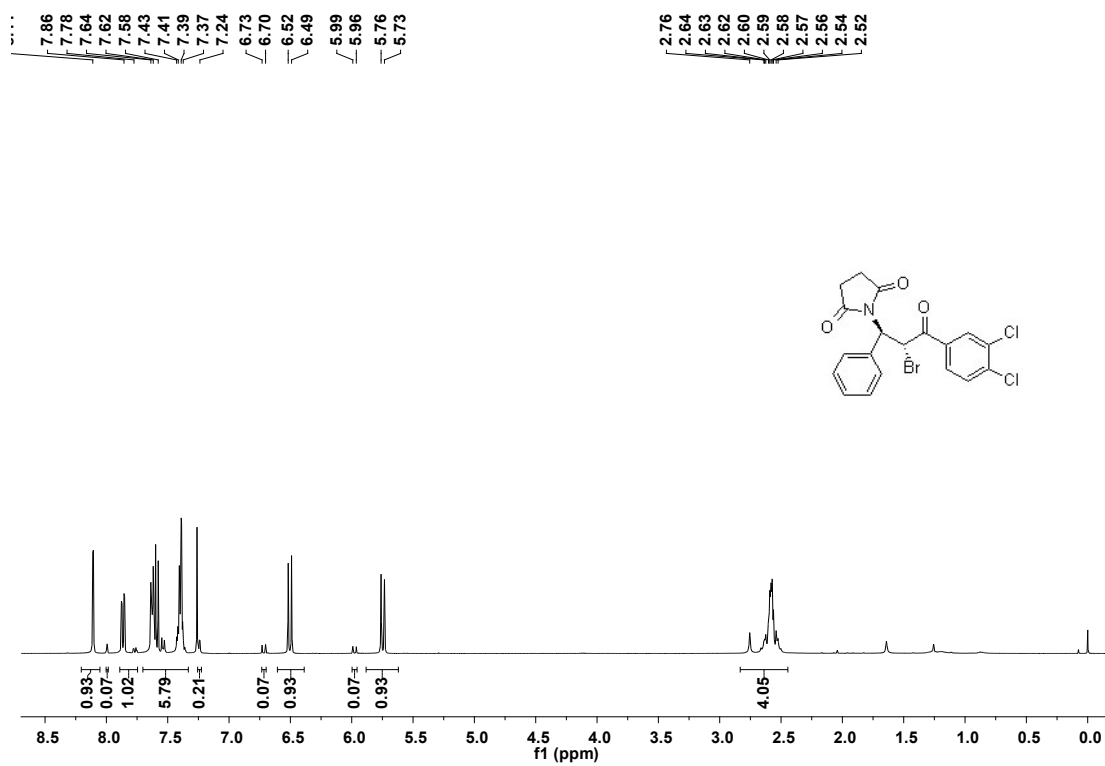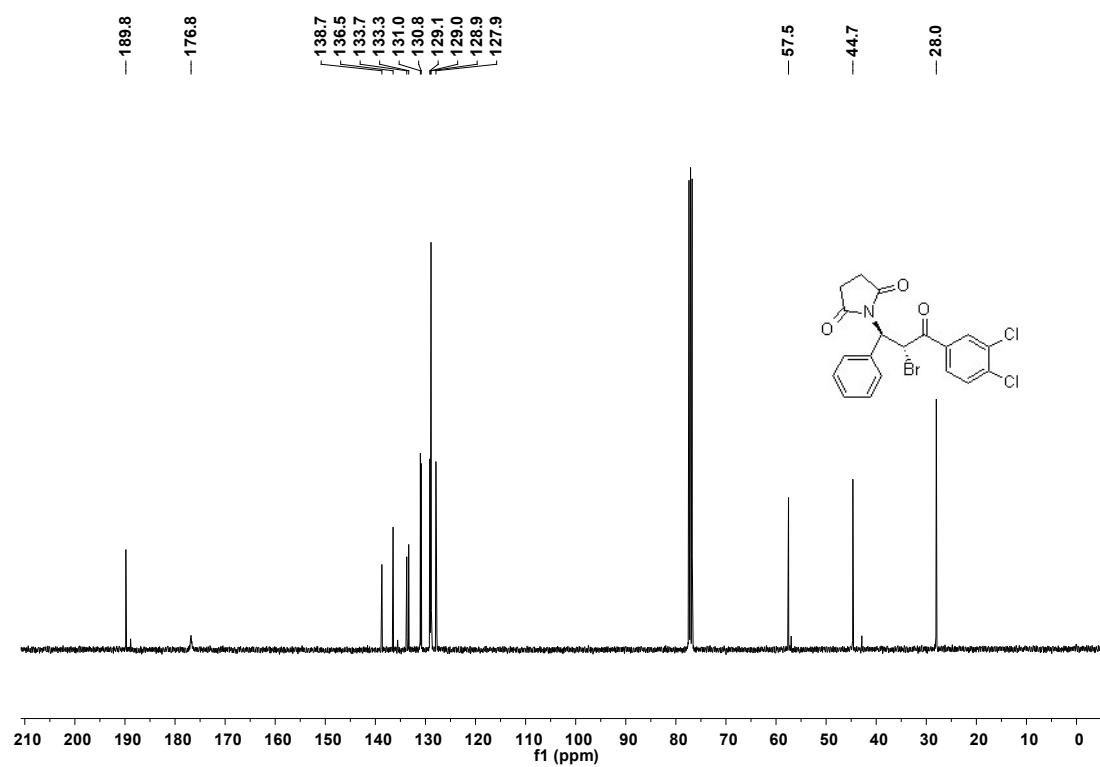

3aa

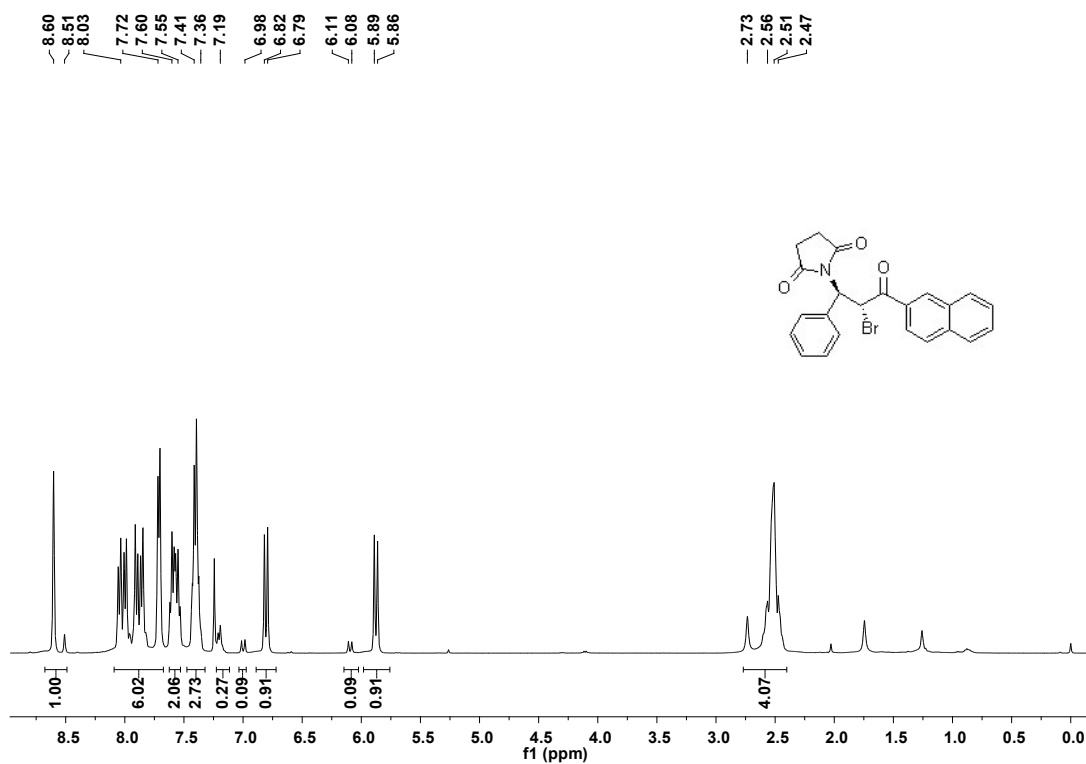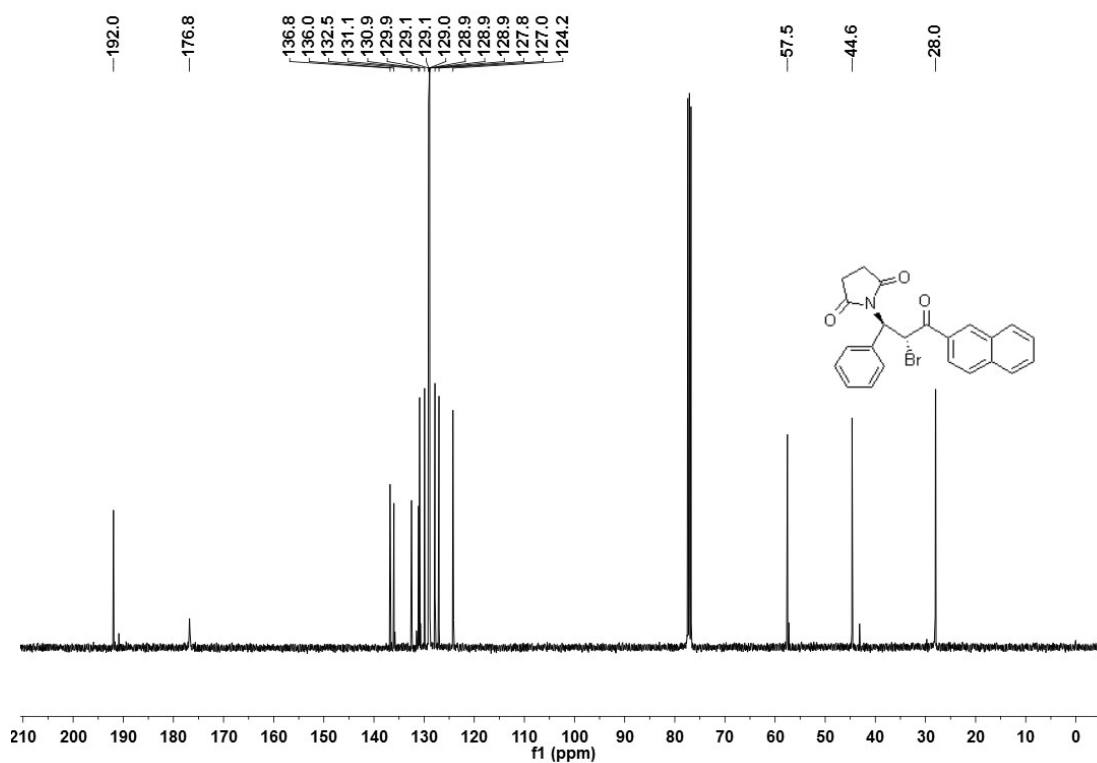

3ab

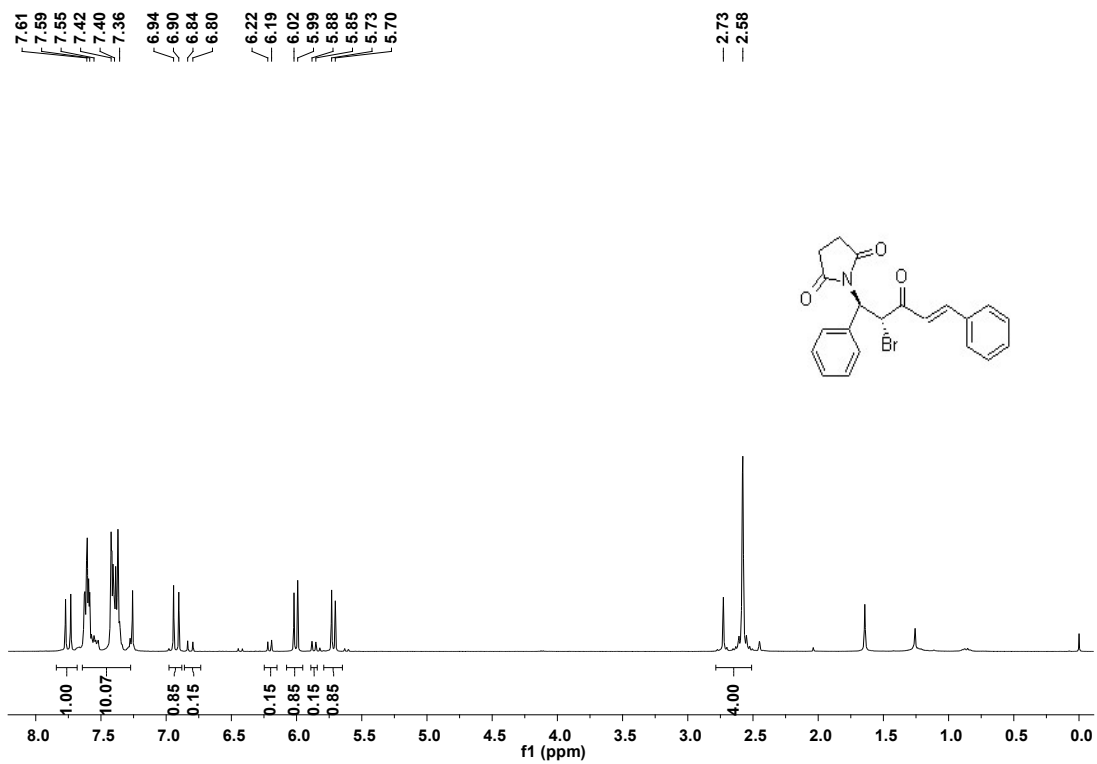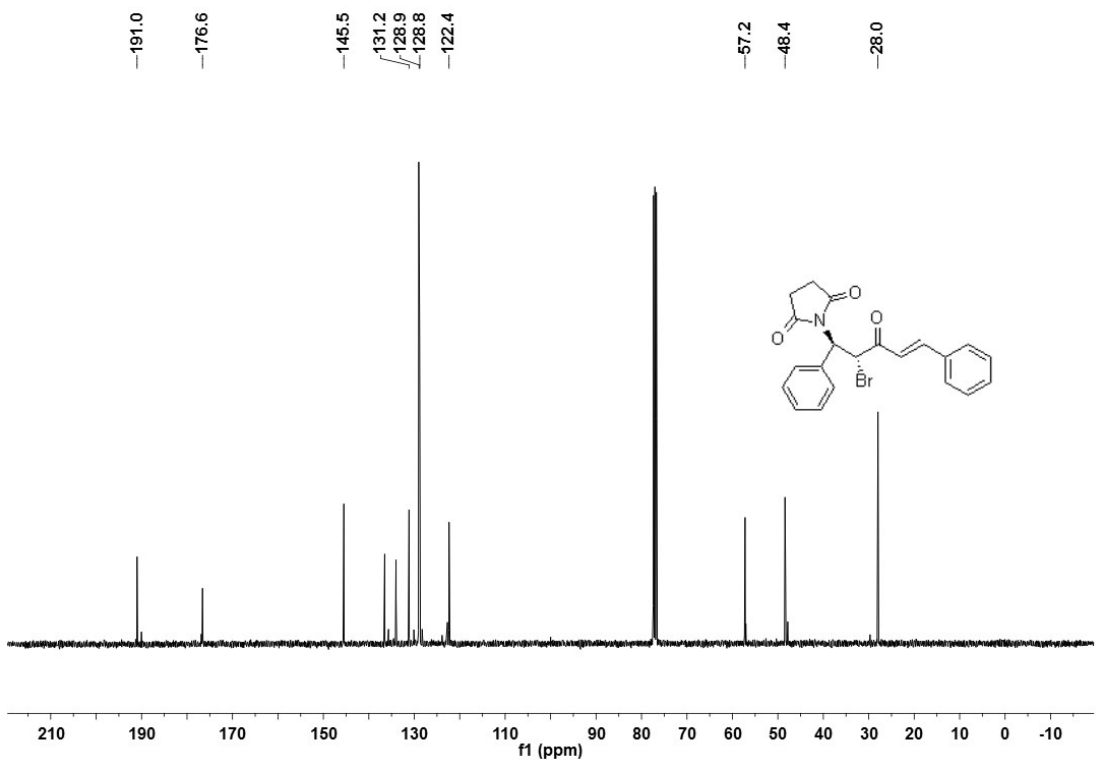

4a

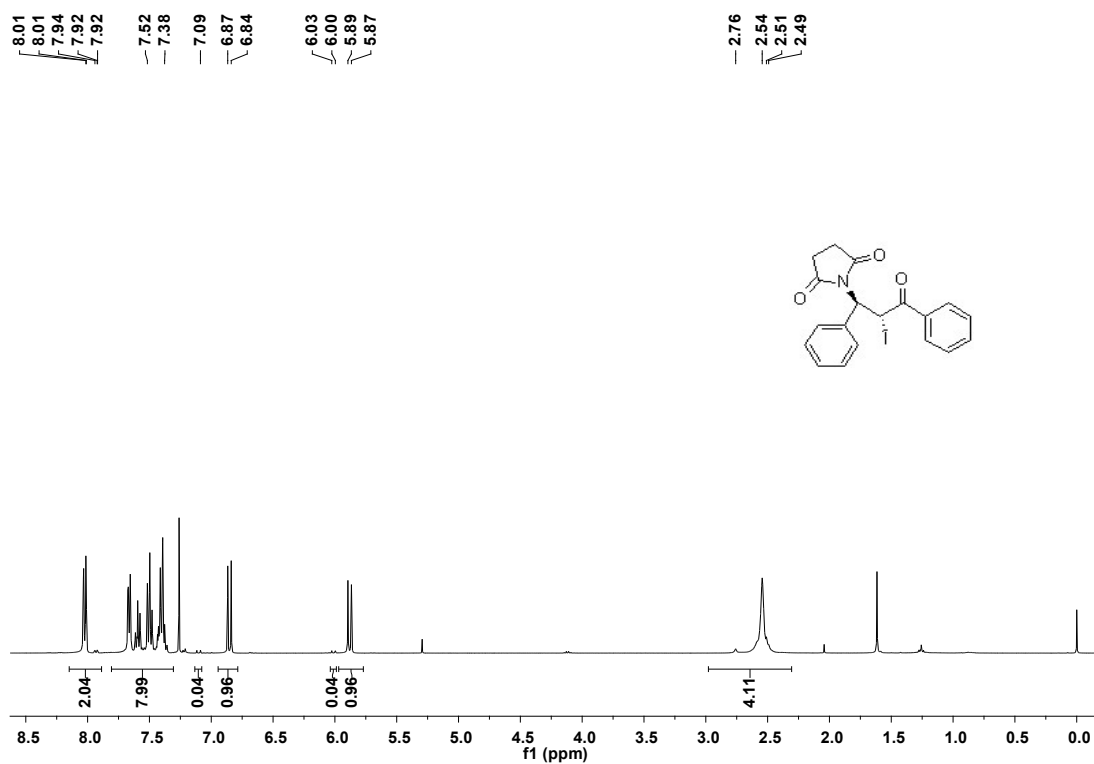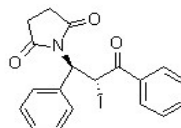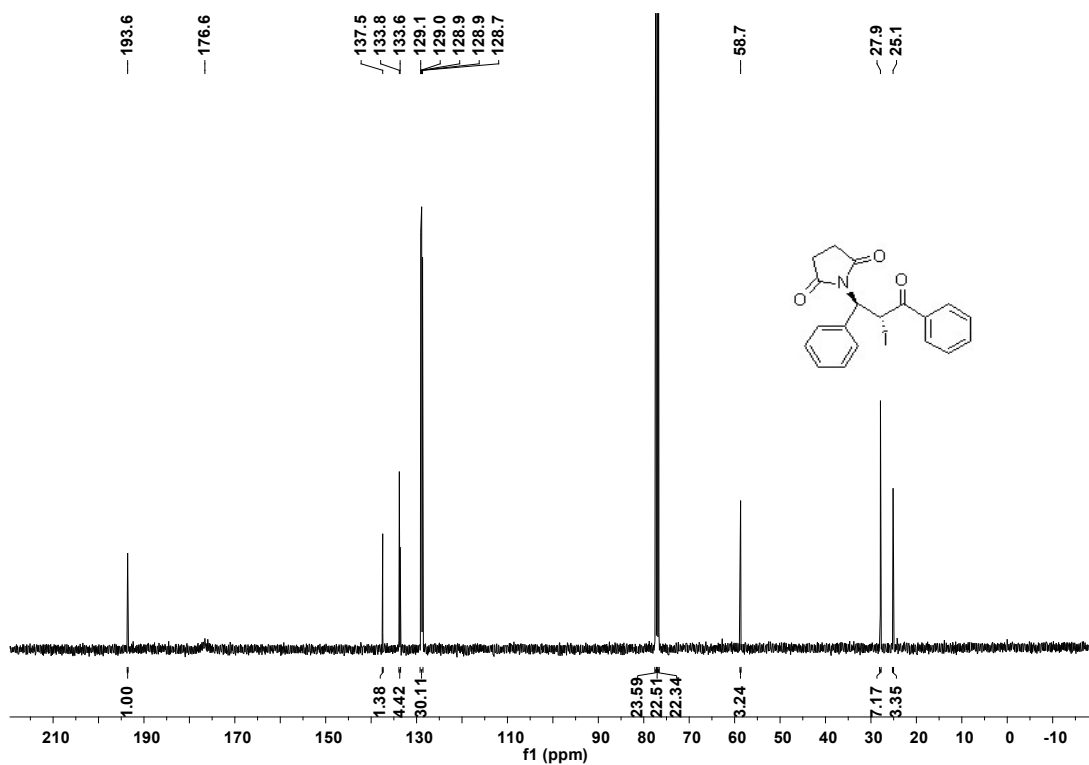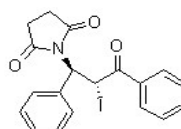



5a

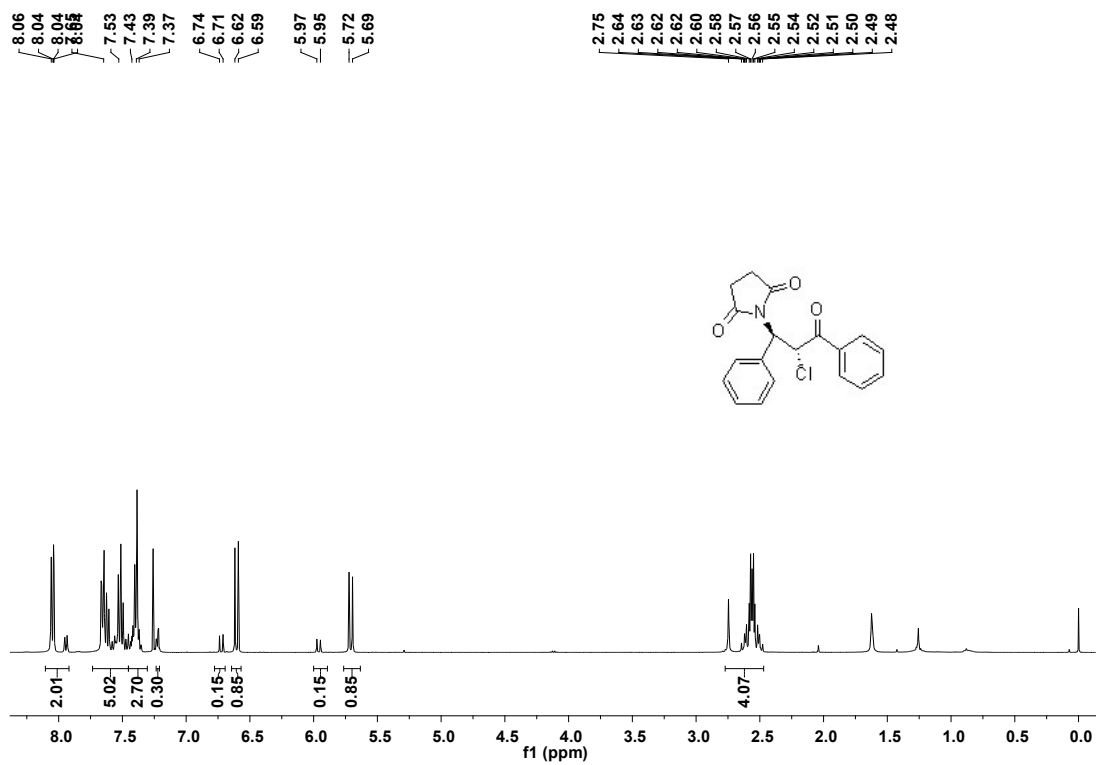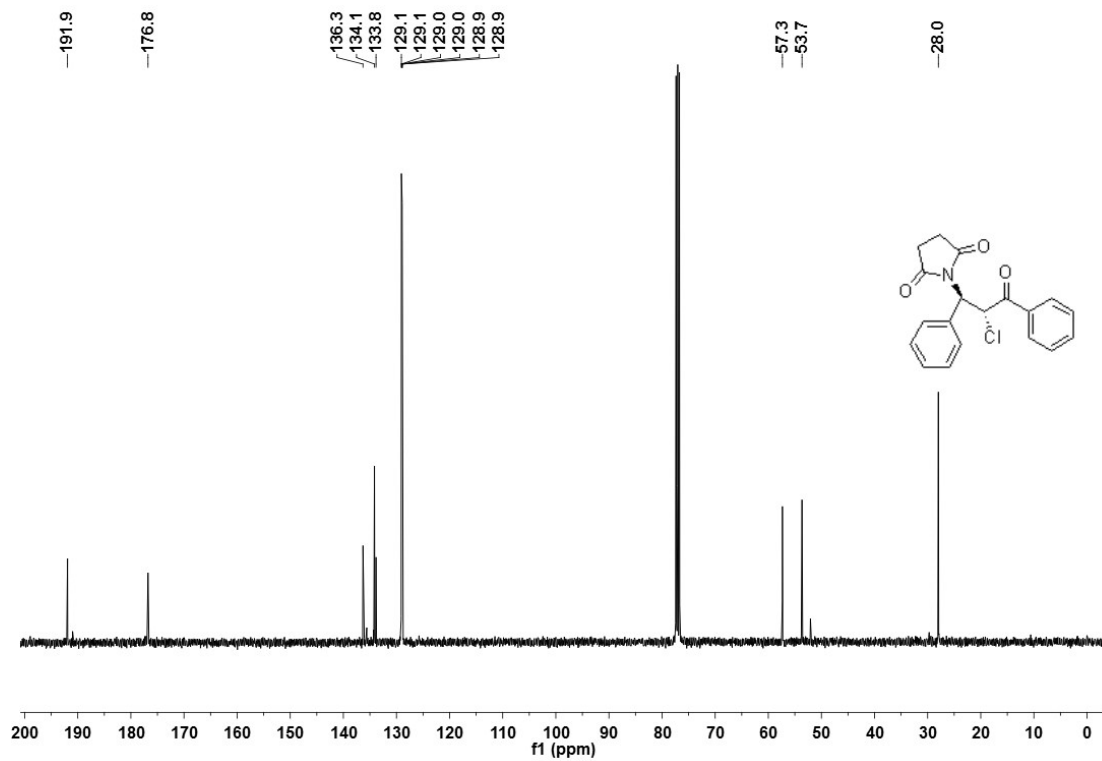

7

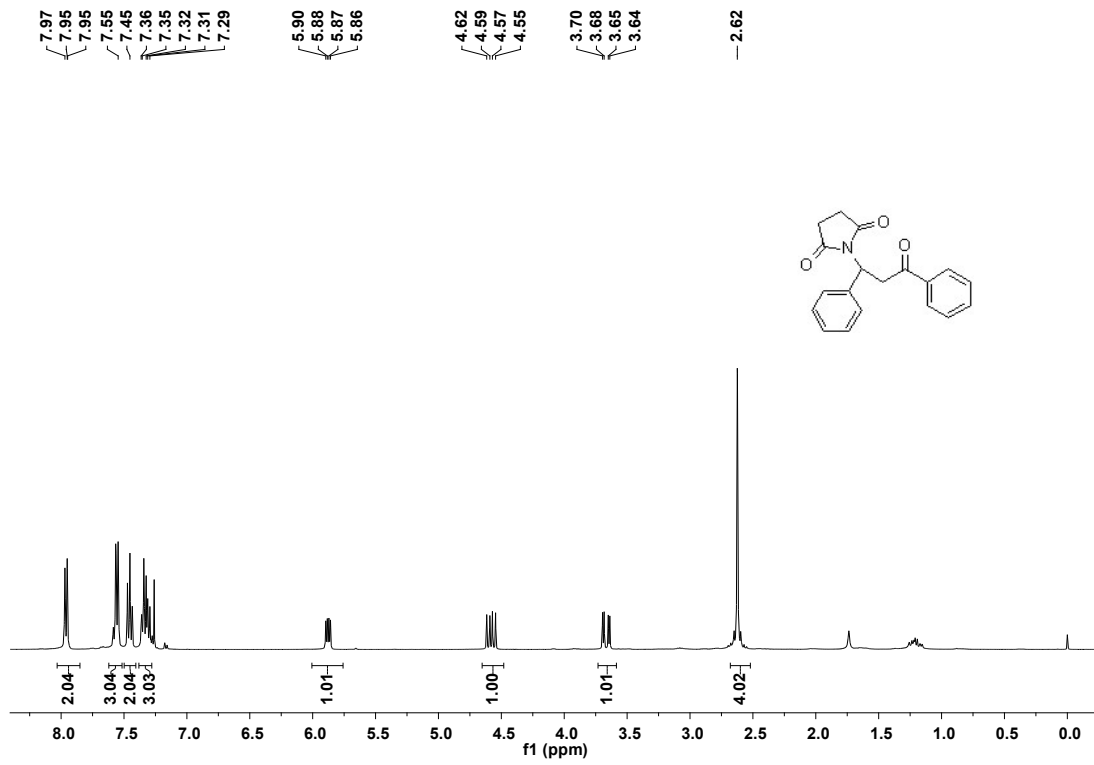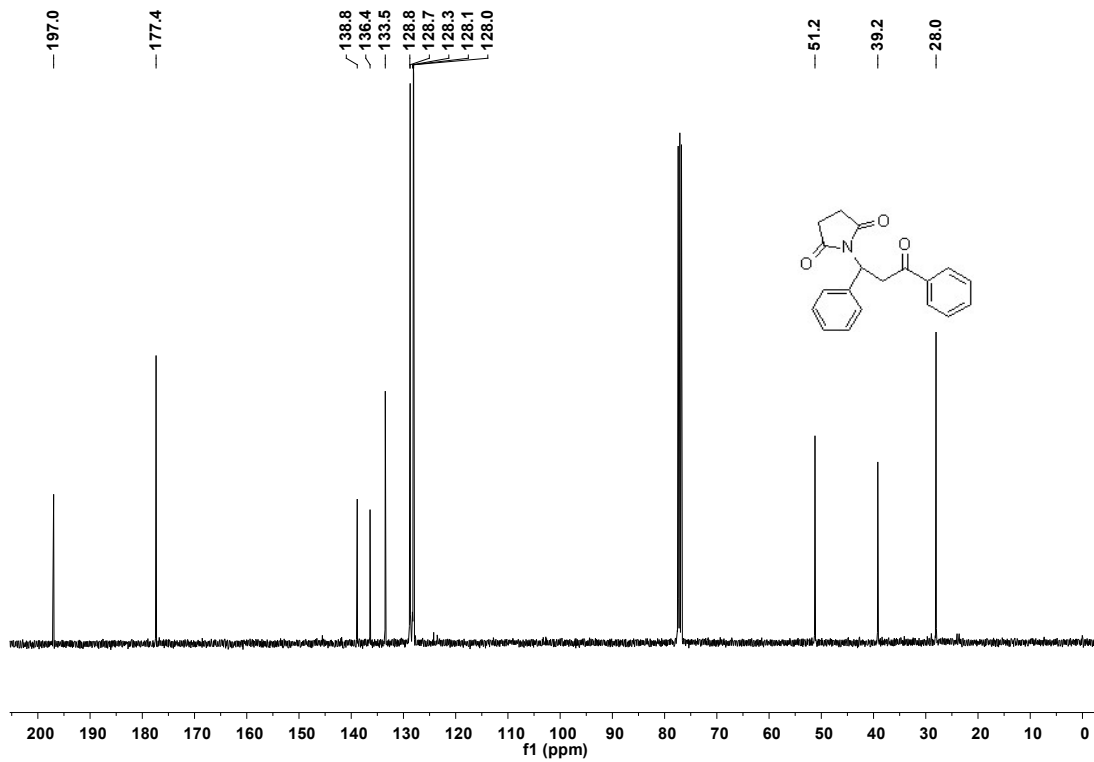

## 8. Copies of CD spectra in methanol

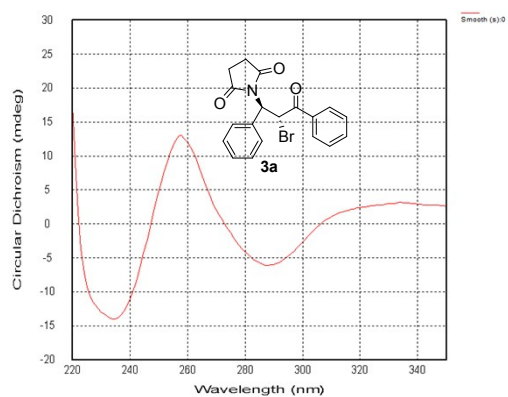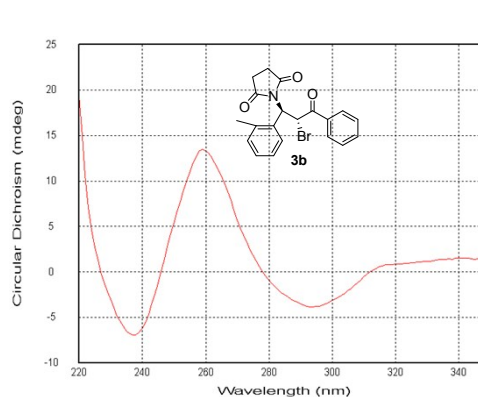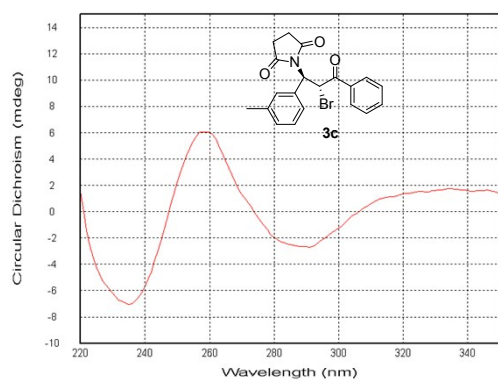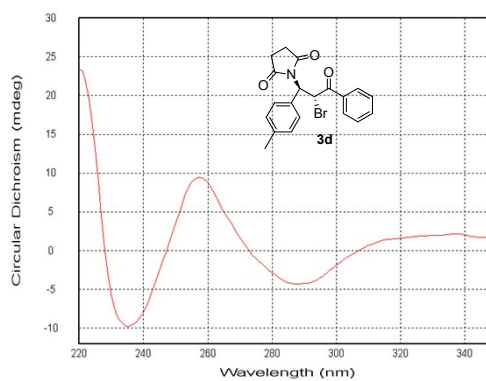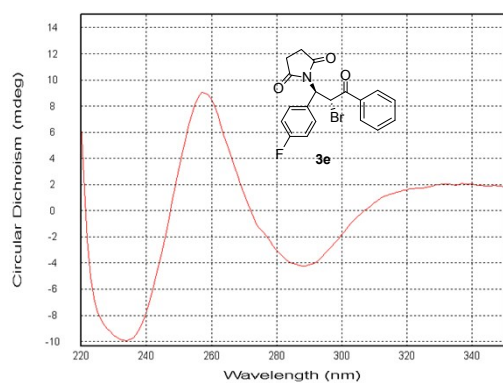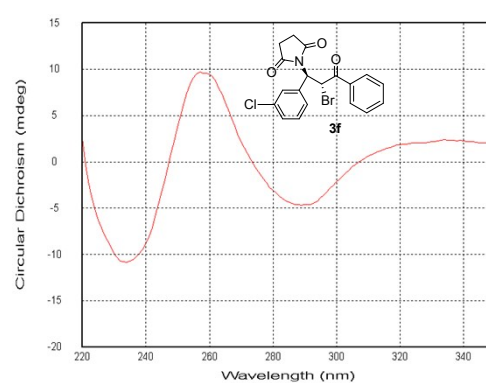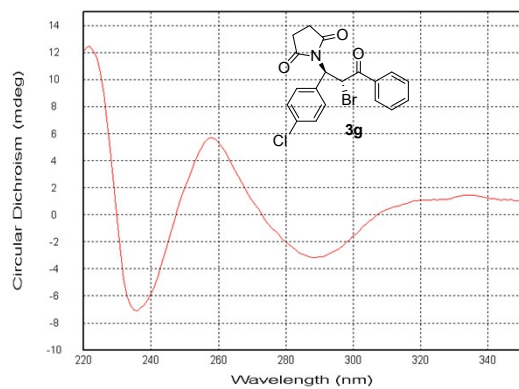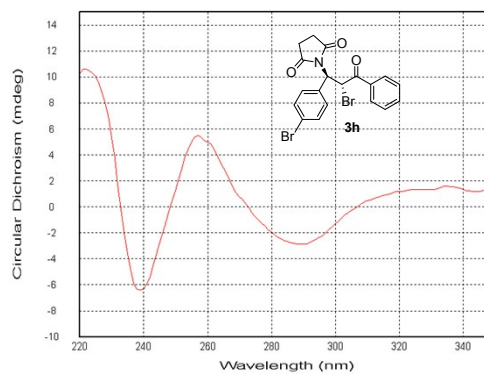

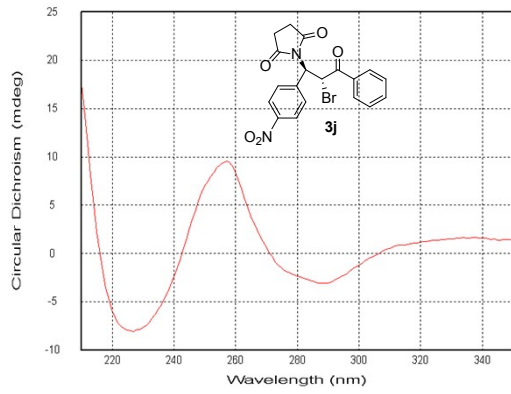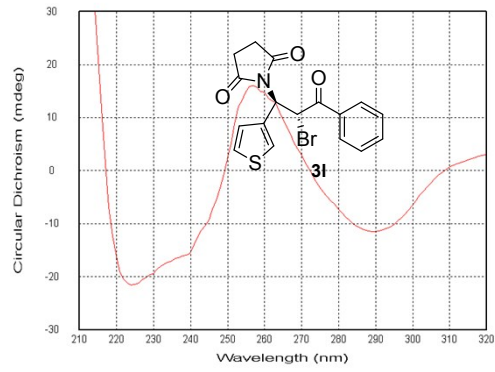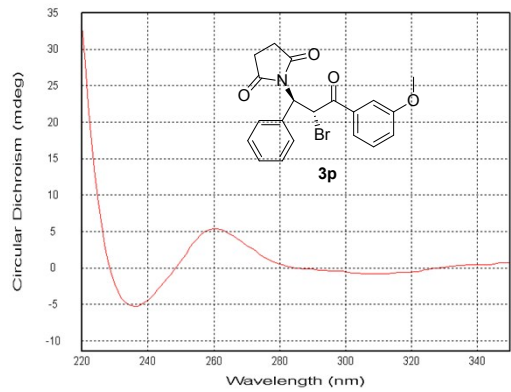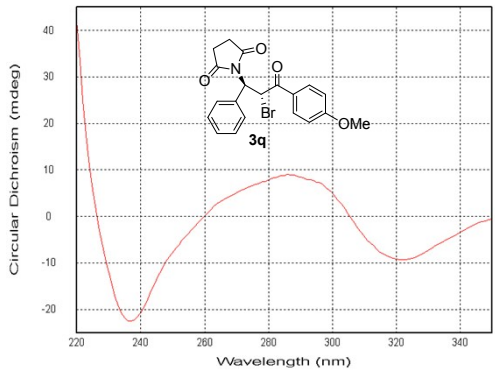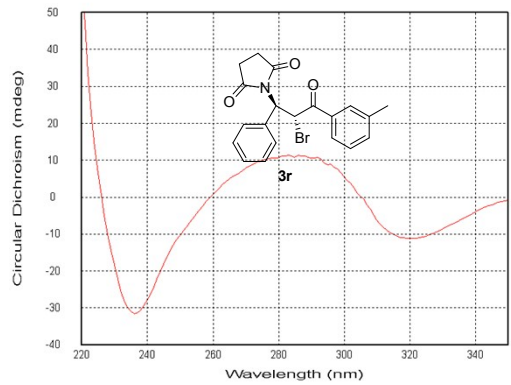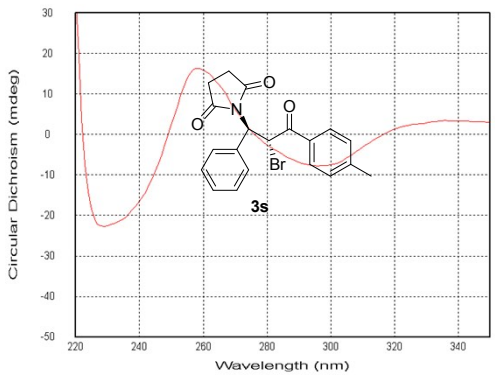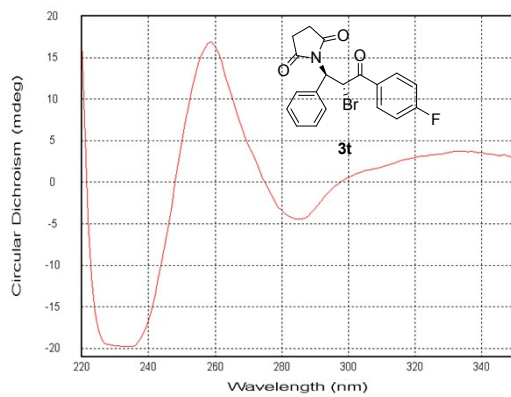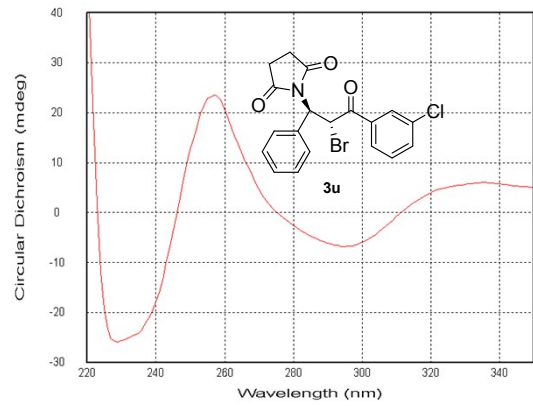

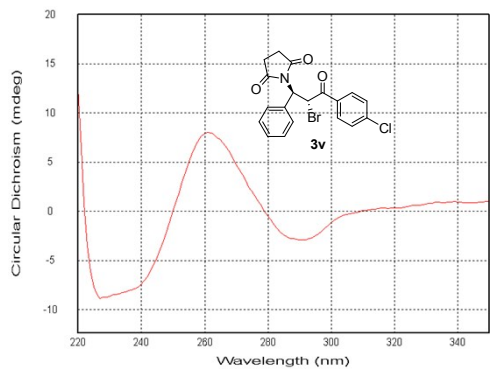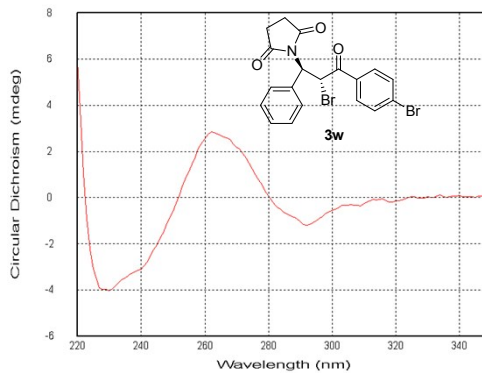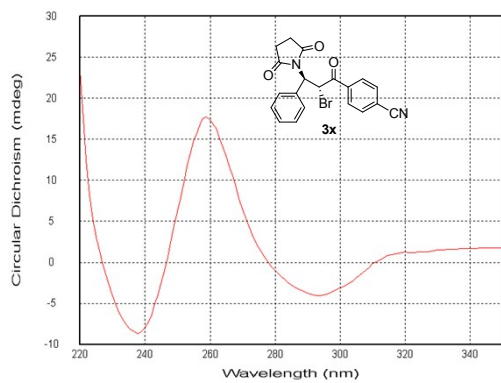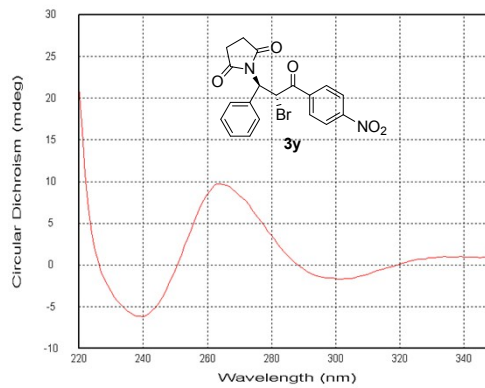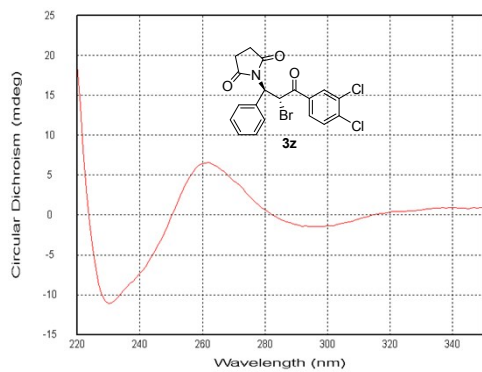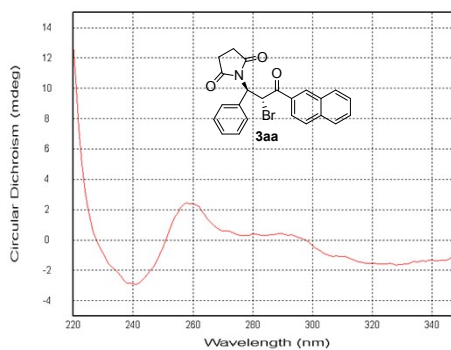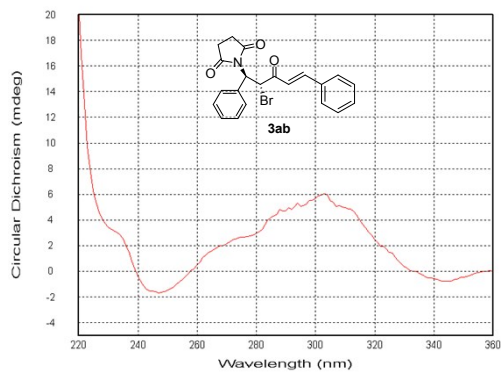

## 9. References

1. (a) Y. H. Wen, X. Huang, J. L. Huang, Y. Xiong, B. Qin and X. M. Feng, *Synlett*, 2005, 2445; (b) Z. P. Yu, X. H. Liu, Z. H. Dong, M. S. Xie and X. M. Feng, *Angew. Chem., Int. Ed.*, 2008, **47**, 1308; (c) K. Zheng, B. Qin, X. H. Liu and X. M. Feng, *J. Org. Chem.*, 2007, **72**, 8478; (d) X. Zhang, D. H. Chen, X. H. Liu and X. M. Feng, *J. Org. Chem.*, 2007, **72**, 5227; (e) X. Zhou, D. J. Shang, Q. Zhang, L. L. Lin, X. H. Liu and X. M. Feng, *Org. Lett.*, 2009, **11**, 1401.
